# Supplementary material for: Chemoselective oxidative generation of ortho-quinone methides and tandem transformations
Source: Springer Nature journal article supplement (doi:10.1038/s41557-020-0433-4), 2020-03-23
Supplement: 41557_2020_433_MOESM95_ESM.cif [file 41557_2020_433_MOESM95_ESM.cif]

data_global
_audit_creation_date                               2018-02-07
_audit_creation_method                            'by CrystalStructure 4.2.2'
_audit_update_record                               ?

#==============================================================================
# PROCESSING SUMMARY (IUCr Office Use Only)

_journal_date_recd_electronic                      ?
_journal_date_from_coeditor                        ?
_journal_date_accepted                             ?
_journal_coeditor_code                             ?

#==============================================================================
# SUBMISSION DETAILS

_publ_contact_author_name                         'ENTER NAME'
_publ_contact_author_email                        'ENTER EMAIL ADDRESS'
_publ_contact_author_fax                          'ENTER FAX NUMBER'
_publ_contact_author_phone                        'ENTER PHONE NUMBER'
_publ_contact_letter
;
    ENTER TEXT OF LETTER
;
_publ_requested_journal                           'ENTER JOURNAL NAME HERE'
_publ_requested_category
                                               'CHOOSE FI FM FO CI CM CO or AD'
_publ_requested_coeditor_name                      ?

#==============================================================================
# TITLE AND AUTHOR LIST

_publ_section_title
;
    ENTER SECTION TITLE
;
_publ_section_title_footnote
;
    ENTER FOOTNOTE TO TITLE OF PAPER
;
loop_
_publ_author_name
_publ_author_footnote
_publ_author_address
' FIRST AUTHORS NAME '
;
  FIRST AUTHORS FOOTNOTES
;
;
  FIRST AUTHORS ADDRESS
;
_publ_section_synopsis
;
    ENTER SYNOPSIS
;

#==============================================================================
# TEXT

_publ_section_abstract
;
    ENTER ABSTRACT
;
_publ_section_comment
;
    ENTER TEXT
;
_publ_section_references
;
    ENTER OTHER REFERENCES

    Rigaku (2016). CrystalStructure. Version 4.2.2. 
    Rigaku Corporation, Tokyo, Japan.

    Sheldrick, G. M. (2014). Acta Cryst. (2014). A70, C1437.
    SHELXT Version 2014/5

    Sheldrick, G.M. (2008) SHELXL Version 2016/4, Acta Cryst. A64, 112-122.

;
_publ_section_figure_captions
;
    ENTER FIGURE CAPTIONS
;
_publ_section_exptl_prep
;
    ENTER COMPOUND PREPARATION DETAILS
;
_publ_section_exptl_refinement
;
    ENTER SPECIAL DETAILS OF THE REFINEMENT
;

#==============================================================================
data_20170804

#==============================================================================
# CHEMICAL DATA

_chemical_formula_sum                             'C30 H36 O6'
_chemical_formula_moiety                          'C30 H36 O6'
_chemical_formula_weight                           492.61
_chemical_melting_point                            ?

#==============================================================================
# CRYSTAL DATA
_space_group_crystal_system                        monoclinic
_space_group_name_H-M_alt                         'P 1 21/c 1'
_space_group_name_Hall                            '-P 2ybc'
_space_group_IT_number                             14
loop_
_space_group_symop_id
_space_group_symop_operation_xyz
1   '+X,+Y,+Z'
2   '-X,1/2+Y,1/2-Z'
3   '-X,-Y,-Z'
4   '+X,-1/2-Y,-1/2+Z'
#------------------------------------------------------------------------------
_cell_length_a                                     15.427(8)
_cell_length_b                                     13.679(6)
_cell_length_c                                     12.902(6)
_cell_angle_alpha                                  90.0000
_cell_angle_beta                                   110.440(9)
_cell_angle_gamma                                  90.0000
_cell_volume                                       2551(2)
_cell_formula_units_Z                              4
_cell_measurement_reflns_used                      5511
_cell_measurement_theta_min                        3.20
_cell_measurement_theta_max                        27.40
_cell_measurement_temperature                      123
#------------------------------------------------------------------------------
_exptl_crystal_description                         prism
_exptl_crystal_colour                              colorless
_exptl_crystal_size_max                            0.400
_exptl_crystal_size_mid                            0.300
_exptl_crystal_size_min                            0.200
_exptl_crystal_density_diffrn                      1.282
_exptl_crystal_density_meas                        ?
_exptl_crystal_density_method                     'not measured'
_exptl_crystal_F_000                               1056.00
_exptl_absorpt_coefficient_mu                      0.088
_exptl_absorpt_correction_type                     multi-scan
_exptl_absorpt_process_details
                                                  'CrystalClear (Rigaku, ????)'
_exptl_absorpt_correction_T_min                    0.636
_exptl_absorpt_correction_T_max                    0.983

#==============================================================================
# EXPERIMENTAL DATA

_diffrn_ambient_temperature                        123
_diffrn_radiation_type                            'Mo K\a'
_diffrn_radiation_wavelength                       0.71075
_diffrn_measurement_device_type                   'Rigaku XtaLAB P200'
_diffrn_measurement_method                         \w
_diffrn_detector_area_resol_mean                   5.814
_diffrn_reflns_number                              20986
_diffrn_reflns_av_R_equivalents                    0.0724
_diffrn_reflns_theta_max                           27.378
_diffrn_reflns_theta_full                          25.242
_diffrn_measured_fraction_theta_max                0.974
_diffrn_measured_fraction_theta_full               0.975
_diffrn_reflns_Laue_measured_fraction_max          0.974
_diffrn_reflns_Laue_measured_fraction_full         0.975
_diffrn_reflns_point_group_measured_fraction_max   0.974
_diffrn_reflns_point_group_measured_fraction_full  0.975
_diffrn_reflns_limit_h_min                        -19
_diffrn_reflns_limit_h_max                         19
_diffrn_reflns_limit_k_min                        -11
_diffrn_reflns_limit_k_max                         17
_diffrn_reflns_limit_l_min                        -16
_diffrn_reflns_limit_l_max                         16
_diffrn_standards_number                           0
_diffrn_standards_interval_count                   .
_diffrn_standards_decay_%                          ?
_reflns_number_total                               5754
_reflns_number_gt                                  4186
_reflns_threshold_expression                       F^2^>2.0\s(F^2^)
_reflns_Friedel_coverage          0.000
_reflns_Friedel_fraction_max      .
_reflns_Friedel_fraction_full     .

#==============================================================================
# REFINEMENT DATA

_refine_special_details
;
    Refinement was performed using all reflections. The weighted 
    R-factor (wR) and goodness of fit (S) are based on F^2^.
    R-factor (gt) are based on F. The threshold expression of
    F^2^ > 2.0 sigma(F^2^) is used only for calculating R-factor (gt).
;
_refine_ls_structure_factor_coef                   Fsqd
_refine_ls_R_factor_all                            0.0807
_refine_ls_R_factor_gt                             0.0571
_refine_ls_wR_factor_ref                           0.1651
_refine_ls_wR_factor_gt                            0.1501
_refine_ls_number_restraints                       0
_refine_ls_hydrogen_treatment                      constr
_refine_ls_number_reflns                           5634
_refine_ls_number_parameters                       325
_refine_ls_goodness_of_fit_ref                     1.028
_refine_ls_weighting_scheme                        calc
_refine_ls_weighting_details
           'w = 1/[\s^2^(Fo^2^)+(0.0869P)^2^+1.3766P] where P=(Fo^2^+2Fc^2^)/3'
_atom_sites_solution_hydrogens                     geom
_atom_sites_solution_primary                       direct
_atom_sites_solution_secondary                     difmap
_refine_ls_shift/su_max                            0.000
_refine_diff_density_max                           0.45
_refine_diff_density_min                          -0.45
_refine_ls_extinction_method                       none
_refine_ls_extinction_coef                         ?

loop_
_atom_type_symbol
_atom_type_description
_atom_type_scat_dispersion_real
_atom_type_scat_dispersion_imag
_atom_type_scat_source
  'C' 'C'  0.0033 0.0016 
;
International Tables for Crystallography
(Vol. C, Tables 4.2.6.8 and 6.1.1.4)
;
  'H' 'H'  0.0000 0.0000 
;
International Tables for Crystallography
(Vol. C, Table 6.1.1.4)
;
  'O' 'O'  0.0106 0.0060 
;
International Tables for Crystallography
(Vol. C, Tables 4.2.6.8 and 6.1.1.4)
;

#==============================================================================
# ATOMIC COORDINATES AND THERMAL PARAMETERS

loop_
 _atom_site_label
 _atom_site_type_symbol
 _atom_site_fract_x
 _atom_site_fract_y
 _atom_site_fract_z
 _atom_site_U_iso_or_equiv
 _atom_site_adp_type
 _atom_site_occupancy
 _atom_site_site_symmetry_order  
 _atom_site_calc_flag
 _atom_site_refinement_flags_posn
 _atom_site_refinement_flags_adp
 _atom_site_refinement_flags_occupancy
 _atom_site_disorder_assembly
 _atom_site_disorder_group
O1 O 0.47030(9) 0.50914(9) 0.71651(12) 0.0190(3) Uani 1 1 d . . . . .
O2 O 0.73360(9) 0.39499(9) 0.94690(11) 0.0198(3) Uani 1 1 d . . . . .
O3 O 0.80062(9) 0.48428(10) 0.84986(12) 0.0204(3) Uani 1 1 d . . . . .
O4 O 0.82901(10) 0.73009(10) 0.52425(13) 0.0255(3) Uani 1 1 d . . . . .
O5 O 0.10171(9) 0.43363(10) 0.64495(14) 0.0277(4) Uani 1 1 d . . . . .
O6 O 0.46807(10) 0.33174(11) 0.62144(14) 0.0307(4) Uani 1 1 d . . . . .
C7 C 0.37966(12) 0.48594(13) 0.70365(16) 0.0174(4) Uani 1 1 d . . . . .
C8 C 0.35691(13) 0.41538(13) 0.76660(16) 0.0181(4) Uani 1 1 d . . . . .
C9 C 0.73016(13) 0.63962(13) 0.60175(17) 0.0187(4) Uani 1 1 d . . . . .
H9 H 0.675809 0.663815 0.546565 0.022 Uiso 1 1 calc R U . . .
C10 C 0.89828(13) 0.62960(13) 0.67972(17) 0.0197(4) Uani 1 1 d . . . . .
C11 C 0.80311(12) 0.54220(13) 0.76274(16) 0.0172(4) Uani 1 1 d . . . . .
C12 C 0.72325(12) 0.57712(12) 0.68421(16) 0.0169(4) Uani 1 1 d . . . . .
C13 C 0.81690(13) 0.66628(13) 0.60075(17) 0.0194(4) Uani 1 1 d . . . . .
C14 C 0.31137(13) 0.54010(13) 0.62323(16) 0.0177(4) Uani 1 1 d . . . . .
C15 C 0.71032(13) 0.34031(13) 0.77008(17) 0.0193(4) Uani 1 1 d . . . . .
C16 C 0.54192(12) 0.44052(13) 0.77197(16) 0.0168(4) Uani 1 1 d . . . . .
C17 C 0.19508(12) 0.44905(14) 0.66805(17) 0.0200(4) Uani 1 1 d . . . . .
C18 C 0.63231(12) 0.49834(13) 0.79393(16) 0.0167(4) Uani 1 1 d . . . . .
H18 H 0.636108 0.550032 0.850162 0.020 Uiso 1 1 calc R U . . .
C19 C 0.21796(13) 0.52087(13) 0.60422(16) 0.0183(4) Uani 1 1 d . . . . .
C20 C 0.89153(13) 0.56685(14) 0.76162(17) 0.0197(4) Uani 1 1 d . . . . .
C21 C 0.52703(13) 0.40213(14) 0.87582(17) 0.0207(4) Uani 1 1 d . . . . .
H21A H 0.575656 0.353654 0.912785 0.025 Uiso 1 1 calc R U . . .
H21B H 0.532520 0.456888 0.927913 0.025 Uiso 1 1 calc R U . . .
C22 C 0.62940(12) 0.54861(13) 0.68595(17) 0.0187(4) Uani 1 1 d . . . . .
H22A H 0.599592 0.503905 0.623240 0.022 Uiso 1 1 calc R U . . .
H22B H 0.590517 0.607989 0.674844 0.022 Uiso 1 1 calc R U . . .
C23 C 0.62809(13) 0.30378(13) 0.70641(16) 0.0192(4) Uani 1 1 d . . . . .
C24 C 0.26351(13) 0.39777(14) 0.74840(17) 0.0200(4) Uani 1 1 d . . . . .
H24 H 0.246807 0.350112 0.791608 0.024 Uiso 1 1 calc R U . . .
C25 C 0.54004(13) 0.35613(13) 0.69256(17) 0.0192(4) Uani 1 1 d . . . . .
C26 C 0.71759(12) 0.43169(13) 0.83945(16) 0.0173(4) Uani 1 1 d . . . . .
C27 C 0.43203(13) 0.35451(15) 0.84767(18) 0.0224(4) Uani 1 1 d . . . . .
H27A H 0.433146 0.289003 0.815547 0.027 Uiso 1 1 calc R U . . .
H27B H 0.417957 0.345895 0.916330 0.027 Uiso 1 1 calc R U . . .
C28 C 0.14321(13) 0.57209(14) 0.51210(18) 0.0229(4) Uani 1 1 d . . . . .
H28A H 0.082427 0.549954 0.510836 0.027 Uiso 1 1 calc R U . . .
H28B H 0.148524 0.642872 0.524432 0.027 Uiso 1 1 calc R U . . .
H28C H 0.150106 0.556714 0.441200 0.027 Uiso 1 1 calc R U . . .
C29 C 0.33889(14) 0.61649(14) 0.55604(18) 0.0235(4) Uani 1 1 d . . . . .
H29A H 0.406501 0.620181 0.580325 0.028 Uiso 1 1 calc R U . . .
H29B H 0.313941 0.598675 0.477562 0.028 Uiso 1 1 calc R U . . .
H29C H 0.314088 0.680171 0.566616 0.028 Uiso 1 1 calc R U . . .
C30 C 0.74763(15) 0.77341(15) 0.44826(19) 0.0258(4) Uani 1 1 d . . . . .
H30A H 0.764587 0.817098 0.398215 0.031 Uiso 1 1 calc R U . . .
H30B H 0.706413 0.722029 0.405189 0.031 Uiso 1 1 calc R U . . .
H30C H 0.715907 0.810916 0.489097 0.031 Uiso 1 1 calc R U . . .
C31 C 0.75396(14) 0.46435(15) 1.03515(17) 0.0253(4) Uani 1 1 d . . . . .
H31A H 0.763582 0.429940 1.104917 0.030 Uiso 1 1 calc R U . . .
H31B H 0.810118 0.500602 1.040360 0.030 Uiso 1 1 calc R U . . .
H31C H 0.702124 0.510031 1.020660 0.030 Uiso 1 1 calc R U . . .
C32 C 0.99125(14) 0.65861(16) 0.6750(2) 0.0277(5) Uani 1 1 d . . . . .
H32A H 0.982279 0.702775 0.612261 0.033 Uiso 1 1 calc R U . . .
H32B H 1.027406 0.691853 0.743776 0.033 Uiso 1 1 calc R U . . .
H32C H 1.024393 0.600015 0.665750 0.033 Uiso 1 1 calc R U . . .
C33 C 0.80094(14) 0.29107(16) 0.7832(2) 0.0289(5) Uani 1 1 d . . . . .
H33A H 0.851987 0.329821 0.832936 0.035 Uiso 1 1 calc R U . . .
H33B H 0.801771 0.225580 0.814285 0.035 Uiso 1 1 calc R U . . .
H33C H 0.807971 0.285796 0.710755 0.035 Uiso 1 1 calc R U . . .
C34 C 0.97682(14) 0.52641(17) 0.84874(19) 0.0290(5) Uani 1 1 d . . . . .
H34A H 0.958643 0.483995 0.898880 0.035 Uiso 1 1 calc R U . . .
H34B H 1.012607 0.488507 0.813216 0.035 Uiso 1 1 calc R U . . .
H34C H 1.014716 0.580404 0.890823 0.035 Uiso 1 1 calc R U . . .
C35 C 0.61829(16) 0.21214(15) 0.63897(19) 0.0282(5) Uani 1 1 d . . . . .
H35A H 0.552581 0.198996 0.599095 0.034 Uiso 1 1 calc R U . . .
H35B H 0.650114 0.220584 0.585788 0.034 Uiso 1 1 calc R U . . .
H35C H 0.645797 0.157096 0.688057 0.034 Uiso 1 1 calc R U . . .
C36 C 0.07653(14) 0.34768(17) 0.6893(2) 0.0334(5) Uani 1 1 d . . . . .
H36A H 0.009045 0.344611 0.667597 0.040 Uiso 1 1 calc R U . . .
H36B H 0.098675 0.290124 0.660715 0.040 Uiso 1 1 calc R U . . .
H36C H 0.104478 0.348976 0.770142 0.040 Uiso 1 1 calc R U . . .

loop_
 _atom_site_aniso_label
 _atom_site_aniso_U_11
 _atom_site_aniso_U_22
 _atom_site_aniso_U_33
 _atom_site_aniso_U_23
 _atom_site_aniso_U_13
 _atom_site_aniso_U_12
O1 0.0158(6) 0.0174(6) 0.0226(8) 0.0059(5) 0.0054(5) 0.0024(5)
O2 0.0214(6) 0.0208(7) 0.0141(7) 0.0031(5) 0.0023(5) -0.0006(5)
O3 0.0166(6) 0.0238(7) 0.0179(7) 0.0057(5) 0.0025(5) -0.0021(5)
O4 0.0248(7) 0.0251(7) 0.0270(8) 0.0084(6) 0.0096(6) -0.0022(5)
O5 0.0162(7) 0.0281(8) 0.0370(9) 0.0112(6) 0.0069(6) 0.0009(5)
O6 0.0224(7) 0.0323(8) 0.0301(9) -0.0112(6) -0.0002(6) -0.0019(6)
C7 0.0167(8) 0.0163(9) 0.0184(10) -0.0016(7) 0.0052(7) 0.0001(6)
C8 0.0184(9) 0.0175(9) 0.0172(10) 0.0000(7) 0.0048(7) 0.0010(6)
C9 0.0198(8) 0.0156(9) 0.0190(10) -0.0006(7) 0.0047(7) -0.0003(6)
C10 0.0192(9) 0.0176(9) 0.0227(11) -0.0043(7) 0.0080(8) -0.0026(7)
C11 0.0198(9) 0.0149(8) 0.0159(10) -0.0003(7) 0.0049(7) -0.0002(6)
C12 0.0183(8) 0.0136(8) 0.0182(10) -0.0016(7) 0.0057(7) -0.0005(6)
C13 0.0252(9) 0.0145(9) 0.0199(10) -0.0012(7) 0.0096(8) -0.0025(7)
C14 0.0226(9) 0.0139(8) 0.0163(10) -0.0009(7) 0.0065(7) 0.0016(7)
C15 0.0218(9) 0.0185(9) 0.0171(10) 0.0047(7) 0.0062(8) 0.0038(7)
C16 0.0148(8) 0.0161(9) 0.0176(10) 0.0031(7) 0.0033(7) 0.0014(6)
C17 0.0164(8) 0.0209(9) 0.0221(11) -0.0017(8) 0.0058(8) 0.0001(7)
C18 0.0171(8) 0.0133(8) 0.0186(10) -0.0010(7) 0.0046(7) -0.0003(6)
C19 0.0209(9) 0.0165(9) 0.0162(10) -0.0010(7) 0.0048(7) 0.0027(7)
C20 0.0195(9) 0.0190(9) 0.0190(10) -0.0031(7) 0.0049(8) 0.0002(7)
C21 0.0187(9) 0.0230(10) 0.0182(10) 0.0041(8) 0.0038(7) -0.0001(7)
C22 0.0167(8) 0.0168(9) 0.0206(10) 0.0031(7) 0.0041(7) 0.0006(6)
C23 0.0251(9) 0.0161(9) 0.0158(10) 0.0012(7) 0.0065(8) 0.0017(7)
C24 0.0216(9) 0.0183(9) 0.0206(10) 0.0017(7) 0.0079(8) -0.0003(7)
C25 0.0211(9) 0.0173(9) 0.0182(10) 0.0028(7) 0.0057(8) -0.0018(7)
C26 0.0163(8) 0.0181(9) 0.0159(10) 0.0028(7) 0.0036(7) -0.0001(6)
C27 0.0198(9) 0.0235(10) 0.0229(11) 0.0086(8) 0.0063(8) 0.0005(7)
C28 0.0209(9) 0.0222(10) 0.0238(11) 0.0031(8) 0.0055(8) 0.0042(7)
C29 0.0240(9) 0.0210(10) 0.0250(11) 0.0058(8) 0.0080(8) 0.0021(7)
C30 0.0318(10) 0.0222(10) 0.0243(11) 0.0065(8) 0.0111(9) 0.0008(8)
C31 0.0259(10) 0.0284(11) 0.0177(11) -0.0024(8) 0.0029(8) -0.0050(8)
C32 0.0208(9) 0.0300(11) 0.0336(13) 0.0028(9) 0.0110(9) -0.0030(8)
C33 0.0250(10) 0.0275(11) 0.0323(13) 0.0020(9) 0.0079(9) 0.0088(8)
C34 0.0167(9) 0.0382(12) 0.0287(12) 0.0065(9) 0.0037(8) 0.0007(8)
C35 0.0367(11) 0.0199(10) 0.0260(12) -0.0046(8) 0.0082(9) 0.0017(8)
C36 0.0186(9) 0.0346(12) 0.0439(15) 0.0146(10) 0.0069(9) -0.0029(8)

#==============================================================================
_computing_data_collection
                                'CrystalClear-SM Expert 2.1 b29 (Rigaku, 2013)'
_computing_cell_refinement
                                               'CrystalClear-SM Expert 2.1 b29'
_computing_data_reduction
                                               'CrystalClear-SM Expert 2.1 b29'
_computing_structure_solution
                                      'SHELXT Version 2014/5 (Sheldrick, 2014)'
_computing_structure_refinement
                                      'SHELXL Version 2016/4 (Sheldrick, 2008)'
_computing_publication_material
                                        'CrystalStructure 4.2.2 (Rigaku, 2016)'
_computing_molecular_graphics                     'CrystalStructure 4.2.2'

#==============================================================================
# MOLECULAR GEOMETRY

_geom_special_details
;
 All esds (except the esd in the dihedral angle between two l.s. planes)
 are estimated using the full covariance matrix.  The cell esds are taken
 into account individually in the estimation of esds in distances, angles
 and torsion angles; correlations between esds in cell parameters are only
 used when they are defined by crystal symmetry.  An approximate (isotropic)
 treatment of cell esds is used for estimating esds involving l.s. planes.
;

loop_
 _geom_bond_atom_site_label_1
 _geom_bond_atom_site_label_2
 _geom_bond_distance
 _geom_bond_site_symmetry_2
 _geom_bond_publ_flag
O1 C7 1.386(2) . ?
O1 C16 1.436(2) . ?
O2 C26 1.413(2) . ?
O2 C31 1.430(2) . ?
O3 C11 1.387(2) . ?
O3 C26 1.434(2) . ?
O4 C13 1.378(2) . ?
O4 C30 1.424(3) . ?
O5 C17 1.381(2) . ?
O5 C36 1.420(3) . ?
O6 C25 1.214(2) . ?
C7 C8 1.383(3) . ?
C7 C14 1.404(3) . ?
C8 C24 1.398(3) . ?
C8 C27 1.511(3) . ?
C9 C13 1.391(3) . ?
C9 C12 1.398(3) . ?
C9 H9 0.9500 . ?
C10 C20 1.393(3) . ?
C10 C13 1.404(3) . ?
C10 C32 1.510(3) . ?
C11 C12 1.379(3) . ?
C11 C20 1.410(3) . ?
C12 C22 1.507(3) . ?
C14 C19 1.400(3) . ?
C14 C29 1.510(3) . ?
C15 C23 1.344(3) . ?
C15 C33 1.507(3) . ?
C15 C26 1.519(3) . ?
C16 C21 1.529(3) . ?
C16 C25 1.537(3) . ?
C16 C18 1.541(2) . ?
C17 C24 1.385(3) . ?
C17 C19 1.404(3) . ?
C18 C26 1.539(2) . ?
C18 C22 1.540(3) . ?
C18 H18 1.0000 . ?
C19 C28 1.509(3) . ?
C20 C34 1.506(3) . ?
C21 C27 1.527(3) . ?
C21 H21A 0.9900 . ?
C21 H21B 0.9900 . ?
C22 H22A 0.9900 . ?
C22 H22B 0.9900 . ?
C23 C25 1.490(3) . ?
C23 C35 1.503(3) . ?
C24 H24 0.9500 . ?
C27 H27A 0.9900 . ?
C27 H27B 0.9900 . ?
C28 H28A 0.9800 . ?
C28 H28B 0.9800 . ?
C28 H28C 0.9800 . ?
C29 H29A 0.9800 . ?
C29 H29B 0.9800 . ?
C29 H29C 0.9800 . ?
C30 H30A 0.9800 . ?
C30 H30B 0.9800 . ?
C30 H30C 0.9800 . ?
C31 H31A 0.9800 . ?
C31 H31B 0.9800 . ?
C31 H31C 0.9800 . ?
C32 H32A 0.9800 . ?
C32 H32B 0.9800 . ?
C32 H32C 0.9800 . ?
C33 H33A 0.9800 . ?
C33 H33B 0.9800 . ?
C33 H33C 0.9800 . ?
C34 H34A 0.9800 . ?
C34 H34B 0.9800 . ?
C34 H34C 0.9800 . ?
C35 H35A 0.9800 . ?
C35 H35B 0.9800 . ?
C35 H35C 0.9800 . ?
C36 H36A 0.9800 . ?
C36 H36B 0.9800 . ?
C36 H36C 0.9800 . ?

loop_
 _geom_angle_atom_site_label_1
 _geom_angle_atom_site_label_2
 _geom_angle_atom_site_label_3
 _geom_angle
 _geom_angle_site_symmetry_1
 _geom_angle_site_symmetry_3
 _geom_angle_publ_flag
C7 O1 C16 118.59(14) . . ?
C26 O2 C31 117.39(15) . . ?
C11 O3 C26 119.17(14) . . ?
C13 O4 C30 116.69(15) . . ?
C17 O5 C36 116.81(15) . . ?
C8 C7 O1 122.79(17) . . ?
C8 C7 C14 121.55(17) . . ?
O1 C7 C14 115.64(16) . . ?
C7 C8 C24 118.67(17) . . ?
C7 C8 C27 120.03(16) . . ?
C24 C8 C27 121.18(17) . . ?
C13 C9 C12 119.78(18) . . ?
C13 C9 H9 120.1 . . ?
C12 C9 H9 120.1 . . ?
C20 C10 C13 119.06(17) . . ?
C20 C10 C32 121.09(18) . . ?
C13 C10 C32 119.85(18) . . ?
C12 C11 O3 121.54(16) . . ?
C12 C11 C20 121.94(18) . . ?
O3 C11 C20 116.46(16) . . ?
C11 C12 C9 119.02(17) . . ?
C11 C12 C22 121.06(17) . . ?
C9 C12 C22 119.91(17) . . ?
O4 C13 C9 122.95(18) . . ?
O4 C13 C10 115.82(16) . . ?
C9 C13 C10 121.23(18) . . ?
C19 C14 C7 119.41(17) . . ?
C19 C14 C29 120.54(17) . . ?
C7 C14 C29 120.03(17) . . ?
C23 C15 C33 122.88(19) . . ?
C23 C15 C26 121.74(16) . . ?
C33 C15 C26 115.29(17) . . ?
O1 C16 C21 109.65(15) . . ?
O1 C16 C25 109.06(15) . . ?
C21 C16 C25 110.65(15) . . ?
O1 C16 C18 104.21(14) . . ?
C21 C16 C18 114.73(16) . . ?
C25 C16 C18 108.26(15) . . ?
O5 C17 C24 123.31(17) . . ?
O5 C17 C19 115.92(17) . . ?
C24 C17 C19 120.77(17) . . ?
C26 C18 C22 111.14(15) . . ?
C26 C18 C16 111.36(15) . . ?
C22 C18 C16 108.92(15) . . ?
C26 C18 H18 108.4 . . ?
C22 C18 H18 108.4 . . ?
C16 C18 H18 108.4 . . ?
C14 C19 C17 118.89(17) . . ?
C14 C19 C28 120.51(17) . . ?
C17 C19 C28 120.49(17) . . ?
C10 C20 C11 118.94(18) . . ?
C10 C20 C34 121.01(17) . . ?
C11 C20 C34 120.05(18) . . ?
C27 C21 C16 111.31(16) . . ?
C27 C21 H21A 109.4 . . ?
C16 C21 H21A 109.4 . . ?
C27 C21 H21B 109.4 . . ?
C16 C21 H21B 109.4 . . ?
H21A C21 H21B 108.0 . . ?
C12 C22 C18 113.85(16) . . ?
C12 C22 H22A 108.8 . . ?
C18 C22 H22A 108.8 . . ?
C12 C22 H22B 108.8 . . ?
C18 C22 H22B 108.8 . . ?
H22A C22 H22B 107.7 . . ?
C15 C23 C25 121.40(17) . . ?
C15 C23 C35 123.13(18) . . ?
C25 C23 C35 115.35(17) . . ?
C17 C24 C8 120.68(18) . . ?
C17 C24 H24 119.7 . . ?
C8 C24 H24 119.7 . . ?
O6 C25 C23 120.88(18) . . ?
O6 C25 C16 120.63(17) . . ?
C23 C25 C16 118.47(16) . . ?
O2 C26 O3 104.01(14) . . ?
O2 C26 C15 103.74(15) . . ?
O3 C26 C15 110.36(15) . . ?
O2 C26 C18 114.72(15) . . ?
O3 C26 C18 110.81(15) . . ?
C15 C26 C18 112.67(16) . . ?
C8 C27 C21 111.71(16) . . ?
C8 C27 H27A 109.3 . . ?
C21 C27 H27A 109.3 . . ?
C8 C27 H27B 109.3 . . ?
C21 C27 H27B 109.3 . . ?
H27A C27 H27B 107.9 . . ?
C19 C28 H28A 109.5 . . ?
C19 C28 H28B 109.5 . . ?
H28A C28 H28B 109.5 . . ?
C19 C28 H28C 109.5 . . ?
H28A C28 H28C 109.5 . . ?
H28B C28 H28C 109.5 . . ?
C14 C29 H29A 109.5 . . ?
C14 C29 H29B 109.5 . . ?
H29A C29 H29B 109.5 . . ?
C14 C29 H29C 109.5 . . ?
H29A C29 H29C 109.5 . . ?
H29B C29 H29C 109.5 . . ?
O4 C30 H30A 109.5 . . ?
O4 C30 H30B 109.5 . . ?
H30A C30 H30B 109.5 . . ?
O4 C30 H30C 109.5 . . ?
H30A C30 H30C 109.5 . . ?
H30B C30 H30C 109.5 . . ?
O2 C31 H31A 109.5 . . ?
O2 C31 H31B 109.5 . . ?
H31A C31 H31B 109.5 . . ?
O2 C31 H31C 109.5 . . ?
H31A C31 H31C 109.5 . . ?
H31B C31 H31C 109.5 . . ?
C10 C32 H32A 109.5 . . ?
C10 C32 H32B 109.5 . . ?
H32A C32 H32B 109.5 . . ?
C10 C32 H32C 109.5 . . ?
H32A C32 H32C 109.5 . . ?
H32B C32 H32C 109.5 . . ?
C15 C33 H33A 109.5 . . ?
C15 C33 H33B 109.5 . . ?
H33A C33 H33B 109.5 . . ?
C15 C33 H33C 109.5 . . ?
H33A C33 H33C 109.5 . . ?
H33B C33 H33C 109.5 . . ?
C20 C34 H34A 109.5 . . ?
C20 C34 H34B 109.5 . . ?
H34A C34 H34B 109.5 . . ?
C20 C34 H34C 109.5 . . ?
H34A C34 H34C 109.5 . . ?
H34B C34 H34C 109.5 . . ?
C23 C35 H35A 109.5 . . ?
C23 C35 H35B 109.5 . . ?
H35A C35 H35B 109.5 . . ?
C23 C35 H35C 109.5 . . ?
H35A C35 H35C 109.5 . . ?
H35B C35 H35C 109.5 . . ?
O5 C36 H36A 109.5 . . ?
O5 C36 H36B 109.5 . . ?
H36A C36 H36B 109.5 . . ?
O5 C36 H36C 109.5 . . ?
H36A C36 H36C 109.5 . . ?
H36B C36 H36C 109.5 . . ?

loop_
 _geom_torsion_atom_site_label_1
 _geom_torsion_atom_site_label_2
 _geom_torsion_atom_site_label_3
 _geom_torsion_atom_site_label_4
 _geom_torsion
 _geom_torsion_site_symmetry_1
 _geom_torsion_site_symmetry_2
 _geom_torsion_site_symmetry_3
 _geom_torsion_site_symmetry_4
 _geom_torsion_publ_flag
C16 O1 C7 C8 18.7(3) . . . . ?
C16 O1 C7 C14 -162.33(16) . . . . ?
O1 C7 C8 C24 179.36(17) . . . . ?
C14 C7 C8 C24 0.5(3) . . . . ?
O1 C7 C8 C27 -4.7(3) . . . . ?
C14 C7 C8 C27 176.45(18) . . . . ?
C26 O3 C11 C12 22.1(2) . . . . ?
C26 O3 C11 C20 -160.65(16) . . . . ?
O3 C11 C12 C9 176.47(16) . . . . ?
C20 C11 C12 C9 -0.7(3) . . . . ?
O3 C11 C12 C22 -3.8(3) . . . . ?
C20 C11 C12 C22 179.06(17) . . . . ?
C13 C9 C12 C11 -0.6(3) . . . . ?
C13 C9 C12 C22 179.61(17) . . . . ?
C30 O4 C13 C9 3.7(3) . . . . ?
C30 O4 C13 C10 -175.75(17) . . . . ?
C12 C9 C13 O4 -177.79(17) . . . . ?
C12 C9 C13 C10 1.6(3) . . . . ?
C20 C10 C13 O4 178.20(17) . . . . ?
C32 C10 C13 O4 -1.7(3) . . . . ?
C20 C10 C13 C9 -1.2(3) . . . . ?
C32 C10 C13 C9 178.88(18) . . . . ?
C8 C7 C14 C19 -1.5(3) . . . . ?
O1 C7 C14 C19 179.49(16) . . . . ?
C8 C7 C14 C29 -179.95(18) . . . . ?
O1 C7 C14 C29 1.1(3) . . . . ?
C7 O1 C16 C21 -44.6(2) . . . . ?
C7 O1 C16 C25 76.67(19) . . . . ?
C7 O1 C16 C18 -167.90(15) . . . . ?
C36 O5 C17 C24 -13.8(3) . . . . ?
C36 O5 C17 C19 166.01(19) . . . . ?
O1 C16 C18 C26 -172.34(15) . . . . ?
C21 C16 C18 C26 67.8(2) . . . . ?
C25 C16 C18 C26 -56.3(2) . . . . ?
O1 C16 C18 C22 -49.42(18) . . . . ?
C21 C16 C18 C22 -169.32(15) . . . . ?
C25 C16 C18 C22 66.58(18) . . . . ?
C7 C14 C19 C17 1.4(3) . . . . ?
C29 C14 C19 C17 179.74(18) . . . . ?
C7 C14 C19 C28 -174.99(17) . . . . ?
C29 C14 C19 C28 3.4(3) . . . . ?
O5 C17 C19 C14 -179.91(17) . . . . ?
C24 C17 C19 C14 -0.1(3) . . . . ?
O5 C17 C19 C28 -3.6(3) . . . . ?
C24 C17 C19 C28 176.21(18) . . . . ?
C13 C10 C20 C11 -0.1(3) . . . . ?
C32 C10 C20 C11 179.80(18) . . . . ?
C13 C10 C20 C34 -179.41(18) . . . . ?
C32 C10 C20 C34 0.5(3) . . . . ?
C12 C11 C20 C10 1.0(3) . . . . ?
O3 C11 C20 C10 -176.24(16) . . . . ?
C12 C11 C20 C34 -179.62(18) . . . . ?
O3 C11 C20 C34 3.1(3) . . . . ?
O1 C16 C21 C27 57.7(2) . . . . ?
C25 C16 C21 C27 -62.7(2) . . . . ?
C18 C16 C21 C27 174.49(15) . . . . ?
C11 C12 C22 C18 12.7(3) . . . . ?
C9 C12 C22 C18 -167.56(16) . . . . ?
C26 C18 C22 C12 -36.6(2) . . . . ?
C16 C18 C22 C12 -159.68(15) . . . . ?
C33 C15 C23 C25 -178.00(18) . . . . ?
C26 C15 C23 C25 5.7(3) . . . . ?
C33 C15 C23 C35 -2.1(3) . . . . ?
C26 C15 C23 C35 -178.42(18) . . . . ?
O5 C17 C24 C8 178.81(18) . . . . ?
C19 C17 C24 C8 -1.0(3) . . . . ?
C7 C8 C24 C17 0.8(3) . . . . ?
C27 C8 C24 C17 -175.14(18) . . . . ?
C15 C23 C25 O6 167.63(19) . . . . ?
C35 C23 C25 O6 -8.6(3) . . . . ?
C15 C23 C25 C16 -13.6(3) . . . . ?
C35 C23 C25 C16 170.18(17) . . . . ?
O1 C16 C25 O6 -29.9(2) . . . . ?
C21 C16 C25 O6 90.7(2) . . . . ?
C18 C16 C25 O6 -142.74(18) . . . . ?
O1 C16 C25 C23 151.31(16) . . . . ?
C21 C16 C25 C23 -88.00(19) . . . . ?
C18 C16 C25 C23 38.5(2) . . . . ?
C31 O2 C26 O3 57.78(18) . . . . ?
C31 O2 C26 C15 173.25(15) . . . . ?
C31 O2 C26 C18 -63.4(2) . . . . ?
C11 O3 C26 O2 -170.54(14) . . . . ?
C11 O3 C26 C15 78.75(19) . . . . ?
C11 O3 C26 C18 -46.8(2) . . . . ?
C23 C15 C26 O2 100.2(2) . . . . ?
C33 C15 C26 O2 -76.33(19) . . . . ?
C23 C15 C26 O3 -148.87(18) . . . . ?
C33 C15 C26 O3 34.6(2) . . . . ?
C23 C15 C26 C18 -24.4(3) . . . . ?
C33 C15 C26 C18 159.00(17) . . . . ?
C22 C18 C26 O2 170.41(14) . . . . ?
C16 C18 C26 O2 -68.0(2) . . . . ?
C22 C18 C26 O3 53.0(2) . . . . ?
C16 C18 C26 O3 174.65(15) . . . . ?
C22 C18 C26 C15 -71.19(19) . . . . ?
C16 C18 C26 C15 50.4(2) . . . . ?
C7 C8 C27 C21 18.6(3) . . . . ?
C24 C8 C27 C21 -165.48(18) . . . . ?
C16 C21 C27 C8 -44.6(2) . . . . ?

#==============================================================================

#==============================================================================
# Additional structures and associated data_? identifiers
# should be added at this point if there is more than one 
# structure analysis in the CIF.

_shelx_res_file
;
TITL 20170804
 shelxl.res created by SHELXL-2016/4 at 22:16:03 on 07-Feb-2018
CELL  0.71075 15.42700 13.67900 12.90200 90.00000 110.44000 90.00000
ZERR  4 0.00800 0.00600 0.00600 0.00000 0.00900 0.00000
LATT 1
SYMM    -X, .50+Y, .50-Z
SFAC C H O
UNIT 120 144 24
L.S. 5
FMAP 2
PLAN 25
WPDB -2
HTAB
BOND $H
CONF
LIST 4
TEMP -150.0
ACTA
SIZE 0.300 0.400 0.200
WGHT    0.086900    1.376600
FVAR       0.36609
O1    3    0.470300    0.509138    0.716505    11.00000    0.01582    0.01741 =
         0.02260    0.00586    0.00540    0.00243
O2    3    0.733595    0.394995    0.946900    11.00000    0.02138    0.02078 =
         0.01407    0.00314    0.00226   -0.00062
O3    3    0.800624    0.484282    0.849862    11.00000    0.01660    0.02383 =
         0.01791    0.00573    0.00249   -0.00208
O4    3    0.829006    0.730095    0.524250    11.00000    0.02480    0.02511 =
         0.02704    0.00841    0.00964   -0.00223
O5    3    0.101713    0.433630    0.644948    11.00000    0.01617    0.02806 =
         0.03695    0.01118    0.00688    0.00093
O6    3    0.468069    0.331737    0.621438    11.00000    0.02235    0.03226 =
         0.03012   -0.01120   -0.00018   -0.00189
C7    1    0.379657    0.485940    0.703647    11.00000    0.01675    0.01625 =
         0.01838   -0.00155    0.00523    0.00006
C8    1    0.356914    0.415385    0.766596    11.00000    0.01838    0.01752 =
         0.01721   -0.00004    0.00479    0.00098
C9    1    0.730157    0.639619    0.601751    11.00000    0.01975    0.01563 =
         0.01903   -0.00062    0.00469   -0.00026
AFIX  43
H9    2    0.675809    0.663815    0.546565    11.00000   -1.20000
AFIX   0
C10   1    0.898277    0.629603    0.679721    11.00000    0.01921    0.01765 =
         0.02275   -0.00434    0.00799   -0.00262
C11   1    0.803112    0.542199    0.762736    11.00000    0.01979    0.01492 =
         0.01589   -0.00035    0.00487   -0.00017
C12   1    0.723247    0.577123    0.684210    11.00000    0.01827    0.01365 =
         0.01816   -0.00165    0.00566   -0.00046
C13   1    0.816904    0.666284    0.600753    11.00000    0.02519    0.01445 =
         0.01992   -0.00118    0.00957   -0.00252
C14   1    0.311366    0.540104    0.623226    11.00000    0.02261    0.01385 =
         0.01631   -0.00094    0.00655    0.00155
C15   1    0.710319    0.340312    0.770081    11.00000    0.02184    0.01851 =
         0.01715    0.00469    0.00620    0.00376
C16   1    0.541921    0.440517    0.771972    11.00000    0.01484    0.01612 =
         0.01762    0.00309    0.00329    0.00144
C17   1    0.195079    0.449049    0.668046    11.00000    0.01635    0.02088 =
         0.02214   -0.00169    0.00584    0.00012
C18   1    0.632308    0.498341    0.793932    11.00000    0.01708    0.01327 =
         0.01857   -0.00097    0.00461   -0.00029
AFIX  13
H18   2    0.636108    0.550032    0.850162    11.00000   -1.20000
AFIX   0
C19   1    0.217961    0.520868    0.604218    11.00000    0.02091    0.01650 =
         0.01622   -0.00104    0.00485    0.00269
C20   1    0.891529    0.566851    0.761621    11.00000    0.01953    0.01901 =
         0.01901   -0.00310    0.00488    0.00017
C21   1    0.527029    0.402134    0.875820    11.00000    0.01874    0.02295 =
         0.01818    0.00409    0.00382   -0.00014
AFIX  23
H21A  2    0.575656    0.353654    0.912785    11.00000   -1.20000
H21B  2    0.532520    0.456888    0.927913    11.00000   -1.20000
AFIX   0
C22   1    0.629396    0.548606    0.685951    11.00000    0.01674    0.01679 =
         0.02058    0.00309    0.00407    0.00059
AFIX  23
H22A  2    0.599592    0.503905    0.623240    11.00000   -1.20000
H22B  2    0.590517    0.607989    0.674844    11.00000   -1.20000
AFIX   0
C23   1    0.628089    0.303784    0.706413    11.00000    0.02515    0.01605 =
         0.01585    0.00120    0.00648    0.00171
C24   1    0.263515    0.397766    0.748399    11.00000    0.02158    0.01825 =
         0.02056    0.00168    0.00788   -0.00034
AFIX  43
H24   2    0.246807    0.350112    0.791608    11.00000   -1.20000
AFIX   0
C25   1    0.540040    0.356134    0.692557    11.00000    0.02107    0.01727 =
         0.01825    0.00282    0.00568   -0.00176
C26   1    0.717589    0.431693    0.839449    11.00000    0.01632    0.01815 =
         0.01593    0.00277    0.00356   -0.00013
C27   1    0.432034    0.354515    0.847672    11.00000    0.01983    0.02349 =
         0.02292    0.00862    0.00634    0.00048
AFIX  23
H27A  2    0.433146    0.289003    0.815547    11.00000   -1.20000
H27B  2    0.417957    0.345895    0.916330    11.00000   -1.20000
AFIX   0
C28   1    0.143206    0.572089    0.512102    11.00000    0.02088    0.02215 =
         0.02379    0.00306    0.00548    0.00424
AFIX  33
H28A  2    0.082427    0.549954    0.510836    11.00000   -1.20000
H28B  2    0.148524    0.642872    0.524432    11.00000   -1.20000
H28C  2    0.150106    0.556714    0.441200    11.00000   -1.20000
AFIX   0
C29   1    0.338890    0.616486    0.556035    11.00000    0.02401    0.02098 =
         0.02504    0.00577    0.00796    0.00208
AFIX  33
H29A  2    0.406501    0.620181    0.580325    11.00000   -1.20000
H29B  2    0.313941    0.598675    0.477562    11.00000   -1.20000
H29C  2    0.314088    0.680171    0.566616    11.00000   -1.20000
AFIX   0
C30   1    0.747633    0.773412    0.448262    11.00000    0.03181    0.02224 =
         0.02427    0.00652    0.01108    0.00085
AFIX  33
H30A  2    0.764587    0.817098    0.398215    11.00000   -1.20000
H30B  2    0.706413    0.722029    0.405189    11.00000   -1.20000
H30C  2    0.715907    0.810916    0.489097    11.00000   -1.20000
AFIX   0
C31   1    0.753957    0.464350    1.035155    11.00000    0.02587    0.02843 =
         0.01771   -0.00237    0.00287   -0.00501
AFIX  33
H31A  2    0.763582    0.429940    1.104917    11.00000   -1.20000
H31B  2    0.810118    0.500602    1.040360    11.00000   -1.20000
H31C  2    0.702124    0.510031    1.020660    11.00000   -1.20000
AFIX   0
C32   1    0.991245    0.658606    0.674959    11.00000    0.02075    0.02998 =
         0.03360    0.00275    0.01096   -0.00300
AFIX  33
H32A  2    0.982279    0.702775    0.612261    11.00000   -1.20000
H32B  2    1.027406    0.691853    0.743776    11.00000   -1.20000
H32C  2    1.024393    0.600015    0.665750    11.00000   -1.20000
AFIX   0
C33   1    0.800936    0.291071    0.783158    11.00000    0.02502    0.02753 =
         0.03234    0.00199    0.00787    0.00882
AFIX  33
H33A  2    0.851987    0.329821    0.832936    11.00000   -1.20000
H33B  2    0.801771    0.225580    0.814285    11.00000   -1.20000
H33C  2    0.807971    0.285796    0.710755    11.00000   -1.20000
AFIX   0
C34   1    0.976820    0.526408    0.848741    11.00000    0.01670    0.03822 =
         0.02870    0.00645    0.00367    0.00069
AFIX  33
H34A  2    0.958643    0.483995    0.898880    11.00000   -1.20000
H34B  2    1.012607    0.488507    0.813216    11.00000   -1.20000
H34C  2    1.014716    0.580404    0.890823    11.00000   -1.20000
AFIX   0
C35   1    0.618293    0.212141    0.638970    11.00000    0.03672    0.01989 =
         0.02598   -0.00462    0.00825    0.00166
AFIX  33
H35A  2    0.552581    0.198996    0.599095    11.00000   -1.20000
H35B  2    0.650114    0.220584    0.585788    11.00000   -1.20000
H35C  2    0.645797    0.157096    0.688057    11.00000   -1.20000
AFIX   0
C36   1    0.076527    0.347680    0.689284    11.00000    0.01862    0.03464 =
         0.04387    0.01462    0.00693   -0.00287
AFIX  33
H36A  2    0.009045    0.344611    0.667597    11.00000   -1.20000
H36B  2    0.098675    0.290124    0.660715    11.00000   -1.20000
H36C  2    0.104478    0.348976    0.770142    11.00000   -1.20000
AFIX   0
HKLF 4


REM  20170804
REM R1 =  0.0571 for    4179 Fo > 4sig(Fo)  and  0.0807 for all    5634 data
REM    325 parameters refined using      0 restraints

END

WGHT      0.0869      1.3766

REM Instructions for potential hydrogen bonds
EQIV $1 -x+1, -y+1, -z+
HTAB C9 O6_$1
HTAB C21 O2

REM Highest difference peak  0.447,  deepest hole -0.452,  1-sigma level  0.069
Q1    1   0.8277  0.3344  0.7366  11.00000  0.05    0.45
Q2    1   0.7896  0.2223  0.7550  11.00000  0.05    0.41
Q3    1   0.8341  0.2943  0.8578  11.00000  0.05    0.41
Q4    1   0.9413  0.6406  0.6711  11.00000  0.05    0.40
Q5    1   0.6798  0.5620  0.6887  11.00000  0.05    0.40
Q6    1   0.7708  0.6496  0.6029  11.00000  0.05    0.40
Q7    1   1.0281  0.5308  0.8269  11.00000  0.05    0.39
Q8    1   0.5863  0.4685  0.7851  11.00000  0.05    0.39
Q9    1   0.8478  0.5510  0.7601  11.00000  0.05    0.39
Q10   1   0.7593  0.5542  0.7193  11.00000  0.05    0.36
Q11   1   0.7147  0.3881  0.7967  11.00000  0.05    0.35
Q12   1   0.2087  0.4844  0.6357  11.00000  0.05    0.34
Q13   1   0.3716  0.4483  0.7347  11.00000  0.05    0.34
Q14   1   0.6995  0.4755  1.0552  11.00000  0.05    0.34
Q15   1   0.1520  0.4395  0.6564  11.00000  0.05    0.33
Q16   1   0.6689  0.4705  0.8061  11.00000  0.05    0.33
Q17   1   0.3487  0.5132  0.6654  11.00000  0.05    0.33
Q18   1   0.7990  0.4232  1.1060  11.00000  0.05    0.33
Q19   1   0.9691  0.4529  0.8665  11.00000  0.05    0.32
Q20   1   0.3128  0.4079  0.7547  11.00000  0.05    0.32
Q21   1   0.5384  0.4089  0.8234  11.00000  0.05    0.31
Q22   1   0.5427  0.3983  0.7349  11.00000  0.05    0.30
Q23   1   0.2671  0.5292  0.6202  11.00000  0.05    0.29
Q24   1   0.7252  0.6089  0.6482  11.00000  0.05    0.28
Q25   1   0.7507  0.3277  0.7651  11.00000  0.05    0.28
;

_shelx_res_checksum   73165

_shelx_hkl_file
;
   4   0   0  417.55    9.42
   6   0   0    1.42    0.82
   8   0   0  123.95    4.87
  10   0   0   44.53    2.68
  12   0   0  271.25    9.82
  14   0   0   55.55    1.83
  16   0   0    3.82    1.17
  18   0   0   56.86    1.69
   2  -1   0 1485.61   52.23
   3  -1   0   56.17    2.91
   4  -1   0    2.20    0.95
   5  -1   0  167.20   10.58
   6  -1   0   30.06    1.52
   7  -1   0   40.16    1.75
   8  -1   0   -0.77    0.65
   9  -1   0   21.34    0.81
  10  -1   0    9.30    0.74
  11  -1   0   46.81    1.33
  12  -1   0  140.71    3.89
  13  -1   0  128.32    5.44
  14  -1   0    0.31    0.88
  15  -1   0   -0.25    0.71
  16  -1   0   17.13    0.99
  17  -1   0    7.16    0.76
  18  -1   0    0.30    0.80
   1  -2   0   42.71    4.51
   2  -2   0  100.73    4.14
   3  -2   0    1.52    0.85
   4  -2   0   34.86    2.00
   5  -2   0   23.94    1.28
   6  -2   0   -0.09    2.11
   7  -2   0  243.28    6.27
   8  -2   0   65.97    3.05
   9  -2   0   94.81    2.18
  10  -2   0   41.89    1.47
  11  -2   0   14.76    0.77
  12  -2   0  258.78    6.68
  13  -2   0    8.69    0.78
  14  -2   0    1.04    0.71
  15  -2   0    6.09    0.73
  16  -2   0    9.46    0.91
  17  -2   0   16.87    1.20
  18  -2   0   32.39    0.99
   1  -3   0    3.49    0.77
   2  -3   0   15.68    1.92
   3  -3   0  760.03   18.18
   4  -3   0  182.71    4.90
   5  -3   0  284.62    4.59
   6  -3   0  728.33   22.15
   7  -3   0  732.46   17.91
   8  -3   0   71.62    2.21
   9  -3   0  120.02    2.95
  10  -3   0   -0.16    0.68
  11  -3   0  146.64    7.07
  12  -3   0  302.15   10.38
  13  -3   0   21.93    0.84
  14  -3   0    0.48    0.70
  15  -3   0    2.03    0.70
  16  -3   0    3.69    0.72
  17  -3   0    9.59    0.80
  18  -3   0   55.22    1.11
   0  -4   0    2.02    0.57
   1  -4   0    8.95    0.74
   2  -4   0  230.94   14.43
   3  -4   0  219.85    7.12
   4  -4   0   77.46    2.91
   5  -4   0 1868.56   29.58
   6  -4   0  348.63    6.52
   7  -4   0  671.67   15.23
   8  -4   0    3.18    0.49
   9  -4   0    8.65    0.62
  10  -4   0   60.76    2.23
  11  -4   0   52.14    1.82
  12  -4   0  124.87    5.53
  13  -4   0   53.42    1.42
  14  -4   0   13.35    0.92
  15  -4   0   33.51    0.94
  16  -4   0   65.42    1.17
  17  -4   0    6.52    0.78
  18  -4   0   40.19    1.01
   1  -5   0    0.88    0.38
   2  -5   0    0.14    0.36
   3  -5   0    1.34    0.61
   4  -5   0   59.83    2.20
   5  -5   0  583.20   11.54
   6  -5   0  162.35    4.22
   7  -5   0   50.39    1.02
   8  -5   0   12.63    0.66
   9  -5   0    0.27    0.51
  10  -5   0    8.94    0.64
  11  -5   0   17.79    0.85
  12  -5   0  110.59    4.91
  13  -5   0    0.94    0.62
  14  -5   0    0.23    0.87
  15  -5   0    9.10    0.88
  16  -5   0   26.50    1.13
  17  -5   0    5.15    0.92
   0  -6   0  225.74   15.92
   1  -6   0  168.42    6.70
   2  -6   0  503.19   21.04
   3  -6   0    0.46    0.57
   4  -6   0  106.49    1.54
   5  -6   0  442.21   10.56
   6  -6   0   70.27    1.68
   7  -6   0  117.13    2.30
   8  -6   0   91.97    3.35
   9  -6   0   24.68    0.88
  10  -6   0   47.26    1.45
  11  -6   0    0.15    0.67
  12  -6   0   47.10    1.13
  13  -6   0   95.57    3.64
  14  -6   0    1.99    0.66
  15  -6   0    0.67    0.80
  16  -6   0   22.06    1.07
  17  -6   0    1.82    0.97
   1  -7   0   56.93    2.22
   2  -7   0    0.27    0.55
   3  -7   0  166.60    6.79
   4  -7   0    6.50    0.78
   5  -7   0    0.11    0.37
   6  -7   0   34.39    1.04
   7  -7   0   39.61    1.00
   8  -7   0    7.39    0.67
   9  -7   0    9.42    0.65
  10  -7   0    6.21    0.78
  11  -7   0   27.54    1.16
  12  -7   0   19.01    1.11
  13  -7   0    9.46    0.80
  14  -7   0   15.71    0.79
  15  -7   0    3.59    0.91
  16  -7   0   20.22    1.12
  17  -7   0    7.34    1.07
   0  -8   0   25.94    0.92
   1  -8   0   57.52    0.97
   2  -8   0    4.43    0.61
   3  -8   0    2.68    0.56
   4  -8   0   85.85    2.79
   5  -8   0   25.50    1.01
   6  -8   0    7.58    0.50
   7  -8   0    7.68    0.58
   8  -8   0    0.84    0.57
   9  -8   0    2.10    0.57
  10  -8   0   37.76    1.77
  11  -8   0    3.38    0.62
  12  -8   0   39.45    1.17
  13  -8   0    0.10    1.07
  14  -8   0    1.17    0.81
  15  -8   0    7.26    1.08
  16  -8   0    2.39    0.90
   1  -9   0    5.63    0.43
   2  -9   0    1.74    0.46
   3  -9   0   75.33    3.64
   4  -9   0    8.90    0.69
   5  -9   0   11.47    1.12
   6  -9   0   51.60    1.28
   7  -9   0    2.10    0.57
   8  -9   0  119.75    4.38
   9  -9   0    0.97    0.59
  10  -9   0   32.35    1.10
  11  -9   0    0.08    0.70
  12  -9   0    9.32    0.89
  13  -9   0    1.75    0.81
  14  -9   0    6.49    0.88
  15  -9   0   -1.11    0.95
  16  -9   0   17.66    1.26
   0 -10   0   50.16    2.14
   1 -10   0  130.84    5.52
   2 -10   0   11.20    0.73
   3 -10   0   42.78    1.35
   4 -10   0    3.02    0.79
   5 -10   0   27.59    1.39
   6 -10   0    3.07    0.89
   7 -10   0   87.81    4.33
   8 -10   0  140.11    7.15
   9 -10   0   51.44    1.37
  10 -10   0   25.92    1.18
  11 -10   0    1.95    0.83
  12 -10   0    7.14    0.88
  13 -10   0    2.11    1.97
  14 -10   0    0.87    0.90
  15 -10   0    7.79    1.02
   1 -11   0  287.25    8.65
   2 -11   0    7.55    0.82
   3 -11   0    1.92    0.69
   4 -11   0   21.61    0.95
   5 -11   0   -0.23    0.85
   6 -11   0   54.06    3.18
   7 -11   0   -0.62    1.02
   8 -11   0  171.83    7.22
   9 -11   0    8.65    0.85
  10 -11   0    9.41    0.92
  11 -11   0    7.62    0.93
  12 -11   0   25.84    1.05
  13 -11   0   16.98    2.26
  14 -11   0   21.51    1.11
   0 -12   0   11.84    1.59
   1 -12   0    6.74    0.84
   2 -12   0   41.61    2.16
   3 -12   0    4.50    0.89
   4 -12   0   11.31    0.88
   5 -12   0   36.83    1.54
   6 -12   0   11.29    1.05
   7 -12   0   25.30    1.34
   8 -12   0    5.60    0.95
   9 -12   0   16.50    1.02
  10 -12   0    4.36    0.93
  11 -12   0   24.02    1.31
  12 -12   0    4.13    1.01
  13 -12   0    2.72    1.04
   1 -13   0   22.77    1.37
   2 -13   0   65.03    3.03
   3 -13   0   16.38    1.37
   4 -13   0    2.75    0.85
   5 -13   0   11.96    0.99
   6 -13   0   10.52    1.54
   7 -13   0   27.18    1.54
   8 -13   0   24.79    1.49
   9 -13   0   30.41    1.92
  10 -13   0    6.05    0.95
  11 -13   0    0.23    1.18
  12 -13   0    8.64    1.06
   0 -14   0   99.58    3.41
   1 -14   0    2.86    2.19
   2 -14   0   26.89    1.73
   3 -14   0    5.54    1.57
   4 -14   0   60.22    2.33
   5 -14   0    8.94    1.95
   6 -14   0   24.07    1.76
   7 -14   0    7.93    1.34
   8 -14   0   10.03    1.93
   9 -14   0   -0.83    0.97
  10 -14   0   -0.65    1.13
  11 -14   0   39.67    1.41
   1 -15   0   -0.27    1.42
   2 -15   0   35.62    2.00
   3 -15   0    5.27    1.52
   4 -15   0  100.15    3.05
   5 -15   0    1.28    1.52
   6 -15   0   14.50    1.69
   7 -15   0   11.28    3.45
   8 -15   0   22.82    6.00
   9 -15   0    8.07    4.80
   0 -16   0   10.86    2.23
   1 -16   0    0.20    2.41
   2 -16   0   14.88    1.62
   3 -16   0    3.82    1.62
   4 -16   0   91.38    2.73
   5 -16   0   21.43    1.86
   6 -16   0    1.29    2.71
   7 -16   0    5.07    1.86
   8 -16   0    5.84    4.62
   1 -17   0    4.74    1.92
   2 -17   0   12.24    1.68
   3 -17   0    6.04    2.04
   4 -17   0  113.29    3.36
   5 -17   0    2.66    1.96
 -18   0   1   -0.09    0.97
 -16   0   1    0.87    0.97
 -14   0   1    0.02    0.94
 -12   0   1   -0.72    0.94
 -10   0   1   -0.44    0.65
  -8   0   1   -0.32    0.70
  -6   0   1    0.44    0.59
  -4   0   1   -0.15    0.91
   2   0   1   -0.80    1.52
   4   0   1    2.84    2.60
   6   0   1    0.07    0.79
   8   0   1    1.91    0.96
  10   0   1   -0.81    1.25
  12   0   1    0.57    1.15
  14   0   1   -0.33    2.23
  16   0   1   -0.81    1.07
  18   0   1    1.34    1.13
 -19  -1   1    3.26    0.79
 -18  -1   1    1.18    0.76
 -17  -1   1    2.88    0.69
 -16  -1   1   23.22    0.84
 -15  -1   1    1.37    0.67
 -14  -1   1   -0.31    0.78
 -13  -1   1  145.80    5.14
 -12  -1   1  182.22    4.81
 -11  -1   1  140.50    3.78
 -10  -1   1  111.17    3.81
  -9  -1   1   27.82    0.79
  -8  -1   1  246.06    6.18
  -7  -1   1   47.09    1.84
  -6  -1   1  123.38    4.56
  -5  -1   1  163.16   10.66
  -4  -1   1  659.36   20.39
  -3  -1   1   13.54    1.11
  -2  -1   1    7.78    4.12
   2  -1   1   69.17   10.98
   3  -1   1  443.09   26.42
   4  -1   1 1022.72   65.43
   5  -1   1   85.65    3.69
   6  -1   1  129.72    5.23
   7  -1   1   -0.23    0.78
   8  -1   1   63.84    1.69
   9  -1   1   19.85    1.05
  10  -1   1    1.44    0.87
  11  -1   1   76.47    3.35
  12  -1   1  138.88    4.98
  13  -1   1    1.73    1.16
  14  -1   1    1.57    0.77
  15  -1   1    1.83    0.77
  16  -1   1    0.55    0.94
  17  -1   1    5.95    0.83
  18  -1   1   22.03    0.92
 -18  -2   1   28.09    1.04
 -17  -2   1    6.27    0.76
 -16  -2   1   12.06    0.73
 -15  -2   1   19.42    1.16
 -14  -2   1   35.83    0.97
 -13  -2   1    4.49    0.69
 -12  -2   1  219.48    5.71
 -11  -2   1    0.81    0.62
 -10  -2   1  109.40    4.15
  -9  -2   1   16.29    0.74
  -8  -2   1  106.47    2.07
  -7  -2   1   11.34    1.12
  -6  -2   1    4.50    0.65
  -5  -2   1 1316.85   18.26
  -4  -2   1  132.67    4.60
  -3  -2   1   51.21    2.31
  -2  -2   1    3.23    0.41
  -1  -2   1 3563.93  239.42
   0  -2   1  877.53   18.10
   1  -2   1  166.64    9.29
   2  -2   1  335.80   28.72
   3  -2   1  785.97   39.05
   4  -2   1   72.83    4.15
   5  -2   1   68.18    2.96
   6  -2   1  283.78    7.04
   7  -2   1   51.75    2.82
   8  -2   1   61.28    1.58
   9  -2   1    0.57    0.62
  10  -2   1  633.18   16.15
  11  -2   1  260.56    6.93
  12  -2   1    1.48    0.97
  13  -2   1   63.62    1.36
  14  -2   1    1.75    0.70
  15  -2   1    6.47    0.78
  16  -2   1    3.42    0.81
  17  -2   1    2.02    0.78
  18  -2   1   34.71    2.03
 -18  -3   1    4.93    0.80
 -17  -3   1   51.87    1.05
 -16  -3   1   -0.23    0.68
 -15  -3   1   24.76    0.83
 -14  -3   1   24.95    0.87
 -13  -3   1   30.40    1.52
 -12  -3   1   41.33    1.25
 -11  -3   1    0.18    0.70
 -10  -3   1   12.96    0.82
  -9  -3   1    3.54    0.55
  -8  -3   1    7.42    0.67
  -7  -3   1   16.23    0.73
  -6  -3   1  845.18   16.62
  -5  -3   1    4.32    0.41
  -4  -3   1  109.75    3.57
  -3  -3   1  208.36    7.08
  -2  -3   1    2.80    0.65
  -1  -3   1   24.72    1.04
   0  -3   1  448.91   14.14
   1  -3   1  539.75   31.72
   2  -3   1   58.99    2.91
   3  -3   1  353.34   15.53
   4  -3   1   65.50    2.76
   5  -3   1    6.66    1.04
   6  -3   1    2.40    0.60
   7  -3   1    0.66    0.88
   8  -3   1    6.25    0.70
   9  -3   1    1.24    0.81
  10  -3   1   22.66    1.19
  11  -3   1  218.69    7.31
  12  -3   1    1.70    0.71
  13  -3   1    5.82    0.74
  14  -3   1    8.06    0.79
  15  -3   1    1.07    0.76
  16  -3   1   12.46    0.83
  17  -3   1    0.56    0.82
 -18  -4   1   24.52    0.88
 -17  -4   1    3.86    0.71
 -16  -4   1    0.11    0.68
 -15  -4   1   21.77    0.84
 -14  -4   1    0.00    0.77
 -13  -4   1    1.97    0.88
 -12  -4   1    3.12    0.95
 -11  -4   1   26.28    1.01
 -10  -4   1    1.56    0.72
  -9  -4   1    1.17    0.54
  -8  -4   1   51.94    1.01
  -7  -4   1  388.48   10.47
  -6  -4   1   15.56    1.03
  -5  -4   1  213.04    6.49
  -4  -4   1    8.91    0.47
  -3  -4   1  137.50    4.28
  -2  -4   1   60.93    3.33
  -1  -4   1   11.75    0.83
   0  -4   1  117.09    3.76
   1  -4   1   32.37    1.58
   2  -4   1   85.41    7.94
   3  -4   1  143.11   16.43
   4  -4   1   48.34    2.42
   5  -4   1  408.11    9.16
   6  -4   1    2.14    0.67
   7  -4   1  230.14    5.02
   8  -4   1    0.74    0.56
   9  -4   1   -0.19    0.70
  10  -4   1   15.02    1.01
  11  -4   1   17.20    1.15
  12  -4   1  109.17    5.76
  13  -4   1   11.49    1.14
  14  -4   1   22.20    1.06
  15  -4   1    1.13    0.83
  16  -4   1    7.24    0.82
  17  -4   1   -0.41    0.82
 -18  -5   1    5.14    0.80
 -17  -5   1   24.76    1.20
 -16  -5   1    3.70    0.88
 -15  -5   1    0.73    0.81
 -14  -5   1    1.62    0.80
 -13  -5   1   58.53    1.80
 -12  -5   1  172.76    6.28
 -11  -5   1  106.49    2.84
 -10  -5   1   37.98    1.04
  -9  -5   1    0.83    0.55
  -8  -5   1   33.42    1.00
  -7  -5   1    4.34    0.46
  -6  -5   1  702.83   15.34
  -5  -5   1  313.74   11.81
  -4  -5   1  100.49    3.32
  -3  -5   1    3.41    0.45
  -2  -5   1    6.04    1.26
  -1  -5   1  356.39   16.15
   0  -5   1    6.16    0.59
   1  -5   1    1.12    0.50
   2  -5   1  150.70    4.85
   3  -5   1  347.10    8.79
   4  -5   1  150.77    6.31
   5  -5   1  469.68   13.39
   6  -5   1  915.88    9.32
   7  -5   1    3.42    0.57
   8  -5   1    0.97    0.53
   9  -5   1  109.21    3.29
  10  -5   1   29.64    1.15
  11  -5   1    3.70    0.74
  12  -5   1   88.63    2.06
  13  -5   1   -0.32    0.69
  14  -5   1    1.63    0.85
  15  -5   1    0.45    0.84
  16  -5   1   -0.12    1.26
  17  -5   1  142.50    3.32
 -17  -6   1    0.20    1.73
 -16  -6   1    3.68    0.70
 -15  -6   1   15.41    0.80
 -14  -6   1    0.31    0.66
 -13  -6   1   15.95    0.77
 -12  -6   1   10.78    0.71
 -11  -6   1   23.38    0.84
 -10  -6   1   66.06    1.26
  -9  -6   1   39.06    0.97
  -8  -6   1    3.29    0.41
  -7  -6   1   92.77    1.67
  -6  -6   1   45.24    1.25
  -5  -6   1  189.73    5.59
  -4  -6   1    1.88    0.39
  -3  -6   1  275.64   12.54
  -2  -6   1   -0.32    0.53
  -1  -6   1   30.85    1.27
   0  -6   1   73.27    3.19
   1  -6   1  131.50    4.23
   2  -6   1   16.72    1.14
   3  -6   1    8.79    0.94
   4  -6   1  475.17   13.77
   5  -6   1   64.64    2.04
   6  -6   1   90.83    2.68
   7  -6   1    2.97    0.64
   8  -6   1   40.18    1.22
   9  -6   1    1.01    0.64
  10  -6   1   19.15    0.89
  11  -6   1    4.49    0.68
  12  -6   1    0.12    0.69
  13  -6   1   16.12    0.80
  14  -6   1   -0.24    0.72
  15  -6   1    4.37    1.18
  16  -6   1   12.04    0.87
  17  -6   1    2.44    1.10
 -17  -7   1    0.92    0.84
 -16  -7   1    0.04    1.06
 -15  -7   1   36.14    1.16
 -14  -7   1   23.03    0.78
 -13  -7   1   -0.20    0.59
 -12  -7   1   52.93    1.04
 -11  -7   1    7.91    0.66
 -10  -7   1   55.02    1.49
  -9  -7   1   11.47    0.64
  -8  -7   1   12.30    0.57
  -7  -7   1    0.20    0.43
  -6  -7   1  190.59    3.08
  -5  -7   1   59.11    1.60
  -4  -7   1   37.22    1.68
  -3  -7   1  103.07    2.79
  -2  -7   1   14.00    1.24
  -1  -7   1   96.90    3.77
   0  -7   1   19.28    0.71
   1  -7   1  140.34    3.60
   2  -7   1   47.43    1.90
   3  -7   1   18.02    0.61
   4  -7   1  412.71    8.86
   5  -7   1  209.01    4.45
   6  -7   1    5.70    0.66
   7  -7   1   46.98    1.31
   8  -7   1   56.77    1.39
   9  -7   1    7.48    0.74
  10  -7   1   10.03    0.74
  11  -7   1    9.46    0.73
  12  -7   1   25.09    0.88
  13  -7   1   16.15    0.85
  14  -7   1    1.04    0.71
  15  -7   1   21.68    1.12
  16  -7   1   12.60    1.12
 -17  -8   1   12.09    1.01
 -16  -8   1    4.44    0.89
 -15  -8   1    2.71    0.85
 -14  -8   1    8.16    0.90
 -13  -8   1   10.94    0.90
 -12  -8   1    3.28    0.64
 -11  -8   1    2.38    0.64
 -10  -8   1   -0.44    0.56
  -9  -8   1   27.76    1.07
  -8  -8   1    9.97    0.58
  -7  -8   1   37.37    0.96
  -6  -8   1  153.78    5.55
  -5  -8   1    8.65    0.57
  -4  -8   1   45.68    1.42
  -3  -8   1   11.18    0.68
  -2  -8   1   21.30    0.68
  -1  -8   1   22.81    0.62
   0  -8   1   41.00    1.56
   1  -8   1   32.21    0.96
   2  -8   1   66.13    1.25
   3  -8   1   42.40    1.42
   4  -8   1   29.80    1.02
   5  -8   1   16.80    0.88
   6  -8   1   16.60    0.94
   7  -8   1    0.13    0.56
   8  -8   1  113.87    3.28
   9  -8   1   -0.51    0.61
  10  -8   1    0.48    0.58
  11  -8   1   22.29    0.99
  12  -8   1    1.16    0.79
  13  -8   1   20.24    1.01
  14  -8   1    1.90    2.17
  15  -8   1    7.71    1.60
  16  -8   1   -0.26    1.64
 -16  -9   1    4.84    0.97
 -15  -9   1   24.43    1.13
 -14  -9   1    9.76    0.91
 -13  -9   1    4.37    0.85
 -12  -9   1   14.96    0.97
 -11  -9   1    1.42    0.79
 -10  -9   1   44.62    1.31
  -9  -9   1   74.36    3.23
  -8  -9   1    3.69    0.61
  -7  -9   1    2.95    0.70
  -6  -9   1    6.67    0.64
  -5  -9   1   11.56    0.70
  -4  -9   1   15.87    0.76
  -3  -9   1    2.25    0.53
  -2  -9   1   74.59    2.59
  -1  -9   1   17.12    0.78
   0  -9   1  192.72    2.89
   1  -9   1   21.23    0.72
   2  -9   1  144.14    5.61
   3  -9   1   12.55    0.78
   4  -9   1   32.59    1.20
   5  -9   1    1.30    1.59
   6  -9   1   43.64    1.34
   7  -9   1   -0.35    0.68
   8  -9   1   79.80    3.41
   9  -9   1   22.45    0.88
  10  -9   1    5.15    0.80
  11  -9   1   63.48    1.51
  12  -9   1    3.43    0.74
  13  -9   1    5.63    0.89
  14  -9   1    0.65    0.82
  15  -9   1   12.15    0.97
 -15 -10   1   24.13    1.11
 -14 -10   1    0.37    0.85
 -13 -10   1    2.46    0.87
 -12 -10   1    4.14    0.91
 -11 -10   1    1.70    0.84
 -10 -10   1   24.63    1.06
  -9 -10   1    6.16    0.91
  -8 -10   1   66.73    3.36
  -7 -10   1   40.63    2.29
  -6 -10   1    9.67    0.81
  -5 -10   1  231.49   10.68
  -4 -10   1    8.77    0.81
  -3 -10   1    8.05    1.35
  -2 -10   1   62.56    2.11
  -1 -10   1   18.94    0.92
   0 -10   1  138.37    3.66
   1 -10   1   22.73    0.85
   2 -10   1    3.18    0.79
   3 -10   1    3.77    0.64
   4 -10   1   24.28    0.93
   5 -10   1    0.84    0.92
   6 -10   1    6.29    0.97
   7 -10   1    2.64    1.07
   8 -10   1   19.37    1.00
   9 -10   1    2.77    0.87
  10 -10   1    0.67    1.15
  11 -10   1   27.84    1.15
  12 -10   1   -1.08    0.82
  13 -10   1   19.38    1.06
  14 -10   1    5.31    0.92
 -15 -11   1    2.55    1.04
 -14 -11   1    0.12    0.92
 -13 -11   1   10.72    1.01
 -12 -11   1    4.39    0.88
 -11 -11   1    3.55    0.82
 -10 -11   1   39.07    1.29
  -9 -11   1  111.79    5.01
  -8 -11   1    5.36    1.03
  -7 -11   1    0.23    0.71
  -6 -11   1   67.68    3.13
  -5 -11   1   54.35    3.09
  -4 -11   1    0.73    0.77
  -3 -11   1   11.09    1.00
  -2 -11   1   10.87    0.78
  -1 -11   1    0.94    0.77
   0 -11   1   23.88    1.14
   1 -11   1   16.57    1.16
   2 -11   1   19.63    0.93
   3 -11   1    7.60    0.77
   4 -11   1   22.01    0.94
   5 -11   1    3.64    0.81
   6 -11   1   -1.01    1.00
   7 -11   1    1.13    1.44
   8 -11   1   67.45    4.34
   9 -11   1   27.74    1.11
  10 -11   1    0.94    1.18
  11 -11   1   31.80    1.20
  12 -11   1    1.49    0.85
  13 -11   1   -1.10    0.90
  14 -11   1    0.48    0.96
 -14 -12   1    4.21    1.02
 -13 -12   1   10.68    1.16
 -12 -12   1   12.09    1.74
 -11 -12   1   23.79    1.17
 -10 -12   1   -0.88    0.87
  -9 -12   1  122.68    4.04
  -8 -12   1  105.80    2.00
  -7 -12   1    1.70    1.31
  -6 -12   1    9.99    1.08
  -5 -12   1    0.44    0.88
  -4 -12   1    1.47    0.91
  -3 -12   1   39.85    2.14
  -2 -12   1   40.33    3.10
  -1 -12   1   16.25    1.03
   0 -12   1    0.12    1.07
   1 -12   1    1.18    0.71
   2 -12   1  110.54    5.33
   3 -12   1   15.06    0.91
   4 -12   1   72.60    3.48
   5 -12   1   65.40    1.59
   6 -12   1    8.94    1.14
   7 -12   1   22.14    1.48
   8 -12   1  124.43    2.78
   9 -12   1    5.50    0.94
  10 -12   1    0.42    0.89
  11 -12   1    0.54    0.82
  12 -12   1    0.24    0.92
  13 -12   1   15.33    1.34
 -13 -13   1    4.49    1.12
 -12 -13   1   -0.07    1.00
 -11 -13   1    5.32    0.99
 -10 -13   1    4.86    1.06
  -9 -13   1    5.90    0.96
  -8 -13   1   23.27    1.14
  -7 -13   1   13.17    0.97
  -6 -13   1   49.21    1.71
  -5 -13   1    5.00    1.01
  -4 -13   1    1.46    1.04
  -3 -13   1    9.11    0.88
  -2 -13   1    3.42    0.83
  -1 -13   1    3.05    1.19
   0 -13   1   18.92    1.41
   1 -13   1   79.15    4.75
   2 -13   1   -1.67    1.17
   3 -13   1  331.43   16.60
   4 -13   1   54.75    2.59
   5 -13   1    5.09    0.87
   6 -13   1   43.87    2.06
   7 -13   1   22.66    1.40
   8 -13   1   66.08    2.06
   9 -13   1   24.64    1.49
  10 -13   1    0.68    1.03
  11 -13   1   11.48    1.01
  12 -13   1    8.51    1.06
 -11 -14   1   -1.27    1.06
 -10 -14   1   20.53    1.17
  -9 -14   1   -0.54    0.93
  -8 -14   1    0.41    1.16
  -7 -14   1   79.33    2.21
  -6 -14   1    4.05    2.60
  -5 -14   1    0.47    2.28
  -4 -14   1   23.38    1.69
  -3 -14   1    8.79    1.60
  -2 -14   1    3.07    1.16
  -1 -14   1   19.20    1.94
   0 -14   1    8.60    1.30
   1 -14   1    2.94    1.36
   2 -14   1    7.10    1.37
   3 -14   1   33.25    1.77
   4 -14   1   64.94    5.07
   5 -14   1   54.64    2.96
   6 -14   1   10.71    1.77
   7 -14   1    6.81    1.00
   8 -14   1    7.65    1.18
   9 -14   1    4.84    1.58
  10 -14   1    8.42    1.42
 -10 -15   1    0.55    1.73
  -9 -15   1    2.59    1.86
  -8 -15   1   88.85    2.64
  -7 -15   1   38.66    5.05
  -6 -15   1   12.28    2.85
  -5 -15   1   25.34    1.83
  -4 -15   1    0.93    1.46
  -3 -15   1    0.38    1.35
  -2 -15   1    2.86    1.22
  -1 -15   1   14.42    2.68
   0 -15   1    3.51    1.29
   1 -15   1   32.29    1.75
   2 -15   1   14.54    2.89
   3 -15   1   -0.12    1.45
   4 -15   1   37.74    2.72
   5 -15   1   18.22    2.08
   6 -15   1   89.85    7.25
   7 -15   1    7.58    1.85
   8 -15   1   22.03    1.74
   9 -15   1    3.64    5.44
  -8 -16   1   12.08    4.43
  -7 -16   1    6.00    3.35
  -6 -16   1   12.92    3.30
  -5 -16   1   65.22    2.79
  -4 -16   1  206.95    6.18
  -3 -16   1   14.62    1.62
  -2 -16   1    2.98    1.53
  -1 -16   1    3.52    2.62
   0 -16   1   11.15    3.10
   1 -16   1    5.98    1.63
   2 -16   1   13.44    1.70
   3 -16   1    1.73    2.03
   4 -16   1   -1.30    1.91
   5 -16   1   53.64    2.42
   6 -16   1   11.29    1.85
   7 -16   1   80.76    3.81
  -5 -17   1   20.97    2.25
  -4 -17   1   22.27    2.03
  -3 -17   1   24.53    2.09
  -2 -17   1   19.97    1.94
  -1 -17   1    1.99    1.70
   0 -17   1   10.38    2.57
   1 -17   1    5.67    1.80
   2 -17   1    6.41    2.06
   3 -17   1    0.28    1.75
   4 -17   1   -0.61    1.98
 -18   0   2    9.41    1.07
 -16   0   2   22.10    1.19
 -14   0   2   81.49    4.89
 -12   0   2  412.65   18.80
 -10   0   2  342.57    6.70
  -8   0   2 1007.19    6.54
  -6   0   2   13.77    0.95
  -4   0   2  249.58    9.14
  -2   0   2  182.29   25.71
   0   0   2 8840.75  277.27
   2   0   2 2511.44   65.32
   4   0   2   37.71    3.18
   6   0   2   84.83    4.78
   8   0   2  316.05   12.03
  10   0   2  151.46    8.65
  12   0   2  706.75    7.66
  14   0   2   13.44    1.39
  16   0   2   22.95    2.17
 -19  -1   2    0.59    0.74
 -18  -1   2   50.61    1.83
 -17  -1   2    0.84    0.66
 -16  -1   2    8.39    0.87
 -15  -1   2   14.27    0.77
 -14  -1   2   70.83    2.86
 -13  -1   2  135.06    4.73
 -12  -1   2    4.20    0.59
 -11  -1   2   54.60    1.42
 -10  -1   2   30.57    0.99
  -9  -1   2   23.25    0.67
  -8  -1   2    6.96    0.60
  -7  -1   2 1346.95   28.88
  -6  -1   2  169.33    9.19
  -5  -1   2    4.79    0.56
  -4  -1   2  183.85   10.64
  -3  -1   2  156.31    6.02
  -2  -1   2  513.16   20.51
  -1  -1   2  145.31    8.68
   0  -1   2  449.98   76.29
   1  -1   2   14.50    2.66
   2  -1   2  236.19    8.79
   3  -1   2  244.49   27.55
   4  -1   2  968.80   68.31
   5  -1   2   30.60    2.41
   6  -1   2    2.07    0.96
   7  -1   2    1.02    0.72
   8  -1   2  110.68    2.73
   9  -1   2    0.45    0.76
  10  -1   2   90.30    4.02
  11  -1   2    2.51    0.93
  12  -1   2   47.41    2.19
  13  -1   2   51.11    1.26
  14  -1   2    4.85    0.85
  15  -1   2   16.50    1.20
  16  -1   2    3.68    0.90
  17  -1   2    3.52    0.91
 -19  -2   2    7.48    0.78
 -18  -2   2    4.16    0.99
 -17  -2   2    1.63    0.77
 -16  -2   2    7.22    0.71
 -15  -2   2   -0.27    0.67
 -14  -2   2   89.85    1.82
 -13  -2   2    5.94    0.67
 -12  -2   2  162.08    5.92
 -11  -2   2    1.51    0.55
 -10  -2   2    0.30    0.49
  -9  -2   2    0.89    0.48
  -8  -2   2   50.43    2.28
  -7  -2   2  384.74    7.95
  -6  -2   2   20.54    1.18
  -5  -2   2   82.31    2.78
  -4  -2   2   42.66    1.54
  -3  -2   2  375.33   11.84
  -2  -2   2    1.34    0.32
  -1  -2   2 3070.90   97.07
   0  -2   2 1786.53   70.79
   1  -2   2  522.63   26.64
   2  -2   2    8.83    1.13
   3  -2   2    2.30    1.62
   4  -2   2  252.09    8.99
   5  -2   2    0.32    0.97
   6  -2   2  428.83   13.96
   7  -2   2   14.97    1.39
   8  -2   2    9.60    0.92
   9  -2   2   89.47    3.97
  10  -2   2   -0.49    0.83
  11  -2   2  660.01   16.21
  12  -2   2    0.34    0.84
  13  -2   2    6.56    0.89
  14  -2   2   17.41    1.75
  15  -2   2    1.27    0.78
  16  -2   2    4.70    0.84
  17  -2   2    8.38    1.44
 -19  -3   2   16.62    0.90
 -18  -3   2   66.02    1.25
 -17  -3   2   22.64    0.83
 -16  -3   2    3.56    0.64
 -15  -3   2   29.92    1.17
 -14  -3   2   50.86    1.05
 -13  -3   2    8.37    0.71
 -12  -3   2  263.91    7.33
 -11  -3   2   52.03    1.81
 -10  -3   2    1.53    0.56
  -9  -3   2  227.84    5.16
  -8  -3   2   15.45    0.66
  -7  -3   2  549.20   12.23
  -6  -3   2  277.24   10.29
  -5  -3   2    5.32    0.36
  -4  -3   2   88.00    2.76
  -3  -3   2  844.34   29.15
  -2  -3   2 1046.07   27.55
  -1  -3   2 9999.00  225.68
   0  -3   2 1498.42   56.96
   1  -3   2 1022.69   65.21
   2  -3   2    1.12    0.78
   3  -3   2   96.20   10.40
   4  -3   2  210.60   10.55
   5  -3   2  517.86   11.60
   6  -3   2   21.11    1.59
   7  -3   2   48.62    1.72
   8  -3   2   66.79    2.32
   9  -3   2   11.82    1.00
  10  -3   2  102.73    5.25
  11  -3   2    0.74    1.02
  12  -3   2   40.07    1.94
  13  -3   2    7.33    0.83
  14  -3   2   -0.62    0.80
  15  -3   2    6.45    0.84
  16  -3   2    1.27    0.84
  17  -3   2   10.54    0.89
 -18  -4   2    0.14    0.74
 -17  -4   2   49.42    1.75
 -16  -4   2    1.58    0.64
 -15  -4   2   37.09    0.95
 -14  -4   2   -0.49    0.77
 -13  -4   2    2.78    0.81
 -12  -4   2  338.57    8.88
 -11  -4   2   80.85    3.25
 -10  -4   2   19.78    0.78
  -9  -4   2   27.86    0.87
  -8  -4   2   35.55    0.74
  -7  -4   2  282.92    6.49
  -6  -4   2   16.19    1.00
  -5  -4   2   17.59    1.04
  -4  -4   2   13.09    1.73
  -3  -4   2   98.70    3.74
  -2  -4   2    7.16    0.39
  -1  -4   2 1638.06   53.63
   0  -4   2    0.55    0.59
   1  -4   2    8.27    0.68
   2  -4   2  137.22    5.29
   3  -4   2   16.38    1.61
   4  -4   2  296.84   12.77
   5  -4   2  272.96    9.08
   6  -4   2  326.90    7.54
   7  -4   2   41.99    1.88
   8  -4   2   -0.94    0.66
   9  -4   2   36.93    1.50
  10  -4   2   50.32    2.67
  11  -4   2   42.80    2.59
  12  -4   2    3.23    0.95
  13  -4   2   14.65    1.05
  14  -4   2    0.88    1.25
  15  -4   2   18.60    0.92
  16  -4   2   11.49    0.84
  17  -4   2    3.92    1.00
 -18  -5   2   -0.93    0.80
 -17  -5   2    2.27    0.93
 -16  -5   2    6.36    1.19
 -15  -5   2   30.17    1.08
 -14  -5   2   15.41    0.89
 -13  -5   2  335.79   13.91
 -12  -5   2  144.80    4.46
 -11  -5   2  131.87    3.21
 -10  -5   2   34.53    1.05
  -9  -5   2   54.58    2.09
  -8  -5   2   79.91    1.42
  -7  -5   2   -0.01    0.38
  -6  -5   2   46.15    1.70
  -5  -5   2    3.46    0.45
  -4  -5   2   18.64    0.79
  -3  -5   2    2.48    0.59
  -2  -5   2   27.57    1.17
  -1  -5   2 1286.38   43.39
   0  -5   2   92.90    6.12
   1  -5   2   44.73    1.87
   2  -5   2    1.54    1.49
   3  -5   2   66.36    5.26
   4  -5   2   82.70    5.10
   5  -5   2  237.48    8.51
   6  -5   2  114.96    4.01
   7  -5   2  137.48    4.14
   8  -5   2   43.70    1.46
   9  -5   2    1.93    0.66
  10  -5   2   21.59    0.97
  11  -5   2   19.51    0.93
  12  -5   2   39.11    2.16
  13  -5   2   23.34    0.99
  14  -5   2    3.63    0.94
  15  -5   2    7.31    0.97
  16  -5   2   24.51    1.16
 -18  -6   2   11.49    1.38
 -17  -6   2    2.66    1.17
 -16  -6   2    0.67    0.66
 -15  -6   2    3.77    0.79
 -14  -6   2    0.71    0.60
 -13  -6   2  223.05    3.76
 -12  -6   2   69.00    2.82
 -11  -6   2   12.28    0.68
 -10  -6   2    0.26    0.50
  -9  -6   2   70.11    1.92
  -8  -6   2   46.49    1.67
  -7  -6   2   27.21    0.77
  -6  -6   2   20.71    0.57
  -5  -6   2   68.09    3.65
  -4  -6   2   19.37    1.01
  -3  -6   2   11.44    0.82
  -2  -6   2  147.45    6.12
  -1  -6   2   -0.33    0.44
   0  -6   2  391.79   16.88
   1  -6   2   14.46    1.04
   2  -6   2   11.57    0.88
   3  -6   2    6.20    0.51
   4  -6   2   30.40    1.59
   5  -6   2    8.07    0.68
   6  -6   2  341.25    7.64
   7  -6   2   52.30    3.55
   8  -6   2   14.77    1.16
   9  -6   2    9.14    0.81
  10  -6   2   16.72    0.90
  11  -6   2   25.98    1.04
  12  -6   2   41.94    1.16
  13  -6   2    7.99    0.81
  14  -6   2    7.01    0.78
  15  -6   2    9.65    0.95
  16  -6   2    9.72    1.70
 -17  -7   2   17.88    1.19
 -16  -7   2   42.60    1.33
 -15  -7   2   -0.55    0.67
 -14  -7   2    0.21    0.59
 -13  -7   2    0.23    0.62
 -12  -7   2    3.08    0.80
 -11  -7   2   46.03    1.81
 -10  -7   2    1.15    0.57
  -9  -7   2   41.02    1.10
  -8  -7   2   54.45    1.08
  -7  -7   2    0.87    0.37
  -6  -7   2   65.35    2.09
  -5  -7   2  133.25    5.75
  -4  -7   2   54.40    2.15
  -3  -7   2    1.01    0.47
  -2  -7   2  715.61   27.18
  -1  -7   2   93.50    3.79
   0  -7   2  107.57    1.73
   1  -7   2    1.18    0.43
   2  -7   2    5.67    0.45
   3  -7   2   16.38    0.66
   4  -7   2   99.31    3.91
   5  -7   2   17.51    1.25
   6  -7   2  190.85    7.91
   7  -7   2    0.88    0.85
   8  -7   2   50.61    2.19
   9  -7   2    2.05    0.77
  10  -7   2   78.23    3.74
  11  -7   2   13.62    0.84
  12  -7   2   13.40    0.80
  13  -7   2    9.13    0.81
  14  -7   2   69.07    1.26
  15  -7   2   29.82    1.25
  16  -7   2   16.77    1.14
 -17  -8   2   30.71    1.25
 -16  -8   2    3.30    0.84
 -15  -8   2   -0.10    0.84
 -14  -8   2   -0.43    0.80
 -13  -8   2  122.25    2.75
 -12  -8   2   10.31    0.70
 -11  -8   2   22.93    1.30
 -10  -8   2   -0.35    0.58
  -9  -8   2   54.03    1.31
  -8  -8   2    3.42    0.56
  -7  -8   2   -0.31    0.48
  -6  -8   2  337.51   12.79
  -5  -8   2   21.23    0.83
  -4  -8   2   11.39    0.66
  -3  -8   2    4.08    0.43
  -2  -8   2  589.71   21.50
  -1  -8   2    8.91    0.45
   0  -8   2  121.52    3.46
   1  -8   2    0.49    0.35
   2  -8   2    2.43    0.42
   3  -8   2   75.41    2.51
   4  -8   2    3.36    0.56
   5  -8   2   38.26    1.28
   6  -8   2  250.15    9.42
   7  -8   2    0.37    0.87
   8  -8   2   10.54    1.05
   9  -8   2   35.32    2.20
  10  -8   2   16.98    0.87
  11  -8   2   43.40    1.86
  12  -8   2    3.17    0.76
  13  -8   2    7.53    1.22
  14  -8   2   -0.32    0.99
  15  -8   2    0.02    1.01
 -16  -9   2    1.06    0.96
 -15  -9   2    0.67    0.90
 -14  -9   2   12.10    0.95
 -13  -9   2   -0.35    0.81
 -12  -9   2    0.69    0.81
 -11  -9   2   12.82    0.94
 -10  -9   2    9.89    0.89
  -9  -9   2  134.71    4.84
  -8  -9   2    1.35    0.59
  -7  -9   2    0.11    0.58
  -6  -9   2  250.29    8.54
  -5  -9   2   10.20    0.62
  -4  -9   2   49.46    2.07
  -3  -9   2   24.55    0.73
  -2  -9   2   17.82    1.16
  -1  -9   2    2.76    0.42
   0  -9   2   93.97    4.17
   1  -9   2    1.12    0.43
   2  -9   2   17.58    0.68
   3  -9   2    1.47    0.54
   4  -9   2   66.36    2.77
   5  -9   2    3.93    0.61
   6  -9   2   99.67    3.55
   7  -9   2   30.35    2.20
   8  -9   2   10.63    1.04
   9  -9   2    1.53    0.69
  10  -9   2   55.52    2.75
  11  -9   2    0.76    1.05
  12  -9   2    0.78    0.82
  13  -9   2   -0.25    0.87
  14  -9   2   19.51    0.95
  15  -9   2   41.23    2.63
 -16 -10   2    5.43    1.42
 -15 -10   2   10.23    1.06
 -14 -10   2    2.02    0.92
 -13 -10   2   -0.43    0.88
 -12 -10   2   13.17    1.01
 -11 -10   2    0.61    1.36
 -10 -10   2    5.30    0.92
  -9 -10   2  164.43    3.70
  -8 -10   2   75.65    1.74
  -7 -10   2   42.62    2.32
  -6 -10   2    6.41    0.74
  -5 -10   2    1.64    0.73
  -4 -10   2   19.33    0.74
  -3 -10   2    7.68    0.60
  -2 -10   2   -0.02    0.66
  -1 -10   2  104.94    4.95
   0 -10   2    1.08    0.47
   1 -10   2    0.14    0.51
   2 -10   2   16.97    0.95
   3 -10   2    3.00    0.64
   4 -10   2  124.99    3.52
   5 -10   2   98.33    2.89
   6 -10   2    6.92    0.78
   7 -10   2   10.41    1.50
   8 -10   2   32.67    1.87
   9 -10   2    3.31    1.36
  10 -10   2   34.18    1.18
  11 -10   2    6.13    0.87
  12 -10   2   10.93    1.28
  13 -10   2   -0.23    0.90
  14 -10   2    8.95    1.00
 -15 -11   2   35.86    3.89
 -14 -11   2   10.19    1.03
 -13 -11   2    1.91    0.92
 -12 -11   2    0.61    1.48
 -11 -11   2   -0.23    0.99
 -10 -11   2   16.28    0.99
  -9 -11   2   76.44    3.59
  -8 -11   2   78.54    2.23
  -7 -11   2  126.97    6.41
  -6 -11   2    7.01    0.81
  -5 -11   2  165.40    5.89
  -4 -11   2    2.48    0.79
  -3 -11   2   10.18    1.02
  -2 -11   2   64.38    3.58
  -1 -11   2    1.07    0.72
   0 -11   2   17.75    1.14
   1 -11   2   12.90    1.01
   2 -11   2   51.03    3.07
   3 -11   2  371.93   26.13
   4 -11   2   12.17    0.85
   5 -11   2    0.46    0.84
   6 -11   2   22.76    1.07
   7 -11   2   71.96    3.42
   8 -11   2   -0.19    1.13
   9 -11   2   96.54    4.80
  10 -11   2   -1.34    0.88
  11 -11   2   17.10    2.38
  12 -11   2    1.28    0.94
  13 -11   2    1.58    1.00
 -14 -12   2    1.48    1.04
 -13 -12   2    8.47    1.08
 -12 -12   2   19.16    1.16
 -11 -12   2    1.82    1.47
 -10 -12   2    3.13    0.97
  -9 -12   2   71.02    1.64
  -8 -12   2  120.63    2.17
  -7 -12   2  102.19    4.52
  -6 -12   2   -0.74    0.80
  -5 -12   2   96.55    2.51
  -4 -12   2   21.58    1.22
  -3 -12   2    0.46    0.88
  -2 -12   2   18.24    1.48
  -1 -12   2   37.07    2.16
   0 -12   2   21.43    1.71
   1 -12   2   26.67    1.25
   2 -12   2   18.51    0.95
   3 -12   2  334.89   15.50
   4 -12   2    6.11    0.83
   5 -12   2   15.20    1.18
   6 -12   2   18.29    1.03
   7 -12   2   26.17    1.15
   8 -12   2   -0.62    1.12
   9 -12   2   36.48    3.76
  10 -12   2  122.28    3.21
  11 -12   2   26.85    1.22
  12 -12   2    0.08    0.94
 -13 -13   2    1.12    1.10
 -12 -13   2    5.09    0.99
 -11 -13   2   10.61    1.10
 -10 -13   2   51.01    1.67
  -9 -13   2   20.91    1.19
  -8 -13   2   23.61    1.16
  -7 -13   2   26.51    1.28
  -6 -13   2    1.03    0.82
  -5 -13   2   -0.96    1.00
  -4 -13   2   -0.49    0.95
  -3 -13   2    1.92    1.00
  -2 -13   2    9.30    0.99
  -1 -13   2   -0.32    1.20
   0 -13   2   27.10    1.50
   1 -13   2   20.20    1.46
   2 -13   2  113.69    5.71
   3 -13   2  127.90    7.11
   4 -13   2    0.12    0.92
   5 -13   2   88.17    4.69
   6 -13   2   13.40    0.96
   7 -13   2   51.85    1.45
   8 -13   2    0.25    1.33
   9 -13   2   38.30    1.75
  10 -13   2   -0.68    1.40
  11 -13   2    3.75    1.06
 -12 -14   2   12.16    1.30
 -11 -14   2   32.92    1.38
 -10 -14   2   -0.34    1.16
  -9 -14   2   20.00    2.75
  -8 -14   2    7.91    1.04
  -7 -14   2    0.18    0.95
  -6 -14   2   49.23    2.62
  -5 -14   2    1.67    2.42
  -4 -14   2   -0.35    2.14
  -3 -14   2    0.22    1.64
  -2 -14   2   18.66    1.48
  -1 -14   2    2.98    1.42
   0 -14   2  102.24    7.83
   1 -14   2   71.07    7.00
   2 -14   2   69.54    5.23
   3 -14   2    6.49    1.52
   4 -14   2   -0.26    1.45
   5 -14   2   66.06    5.83
   6 -14   2    1.12    1.34
   7 -14   2   31.86    1.88
   8 -14   2   -0.07    0.95
   9 -14   2    0.30    1.20
  10 -14   2    1.70    1.27
 -10 -15   2    4.64    2.08
  -9 -15   2   -2.63    1.93
  -8 -15   2   30.63    2.11
  -7 -15   2   15.07    1.57
  -6 -15   2    2.54    2.86
  -5 -15   2   25.06    3.17
  -4 -15   2   16.62    2.63
  -3 -15   2  121.47    5.50
  -2 -15   2    5.54    1.39
  -1 -15   2   44.12    2.06
   0 -15   2    4.28    1.50
   1 -15   2    5.51    1.59
   2 -15   2   35.55    1.90
   3 -15   2    5.37    1.54
   4 -15   2   84.12    3.99
   5 -15   2    4.21    1.61
   6 -15   2    1.59    1.39
   7 -15   2    3.34    1.80
   8 -15   2   -0.70    1.68
  -8 -16   2    6.52    2.00
  -7 -16   2    1.71    3.29
  -6 -16   2   10.44    2.99
  -5 -16   2    2.21    2.97
  -4 -16   2   -1.17    1.52
  -3 -16   2   26.53    2.16
  -2 -16   2    7.31    2.29
  -1 -16   2   10.11    1.96
   0 -16   2   11.34    1.68
   1 -16   2    1.38    1.57
   2 -16   2   -1.68    1.60
   3 -16   2   -0.84    1.91
   4 -16   2    9.63    1.68
   5 -16   2   16.71    1.83
   6 -16   2    1.36    2.31
  -5 -17   2    9.31    1.91
  -4 -17   2    0.60    1.73
  -3 -17   2   31.08    3.48
  -2 -17   2   40.72    6.23
  -1 -17   2    1.06    1.76
   0 -17   2    2.08    1.79
   1 -17   2    0.66    1.69
   2 -17   2    1.54    2.30
   3 -17   2    1.62    2.54
 -18   0   3    0.30    0.95
 -16   0   3   -1.71    0.89
 -14   0   3   -0.41    0.76
 -12   0   3   -0.53    0.81
 -10   0   3   -0.67    0.53
  -8   0   3   -0.24    0.50
  -6   0   3   -0.26    0.43
  -4   0   3   -0.53    0.88
  -2   0   3   -0.35    0.99
   0   0   3   -2.30    2.36
   2   0   3    0.30    1.52
   6   0   3   -2.62    1.65
   8   0   3   -0.30    1.11
  10   0   3    0.58    1.47
  12   0   3   -0.28    1.35
  14   0   3   -0.11    1.53
  16   0   3    0.26    1.67
 -19  -1   3   66.46    1.19
 -18  -1   3    2.09    0.67
 -17  -1   3   18.17    0.79
 -16  -1   3   23.61    1.00
 -15  -1   3   10.23    0.71
 -14  -1   3  275.52   11.01
 -13  -1   3  125.25    4.00
 -12  -1   3   14.34    0.68
 -11  -1   3   13.15    0.76
 -10  -1   3   68.20    1.14
  -9  -1   3  183.56    3.65
  -8  -1   3  642.36   14.35
  -7  -1   3   44.32    1.56
  -6  -1   3  353.77   10.40
  -5  -1   3   23.87    1.02
  -4  -1   3   67.98    2.61
  -3  -1   3   38.52    2.41
  -2  -1   3   42.63    1.67
  -1  -1   3  273.73    6.64
   0  -1   3  391.92   16.62
   1  -1   3  109.07    9.32
   2  -1   3    6.47    4.72
   3  -1   3   74.86    5.61
   4  -1   3    4.34    3.58
   5  -1   3  473.71   13.52
   6  -1   3  219.95    7.24
   7  -1   3   19.09    1.22
   8  -1   3    7.03    0.99
   9  -1   3   66.03    2.49
  10  -1   3  203.19    5.83
  11  -1   3  125.33    4.70
  12  -1   3    0.50    0.97
  13  -1   3    1.11    0.92
  14  -1   3    3.71    0.91
  15  -1   3    7.41    1.22
  16  -1   3    0.01    0.96
  17  -1   3    6.13    1.22
 -19  -2   3   26.21    1.02
 -18  -2   3    1.70    1.19
 -17  -2   3    3.14    0.78
 -16  -2   3    1.31    0.65
 -15  -2   3   26.76    0.88
 -14  -2   3   28.22    1.17
 -13  -2   3    0.42    0.74
 -12  -2   3    1.60    0.51
 -11  -2   3   87.26    2.23
 -10  -2   3   11.37    0.55
  -9  -2   3    0.49    0.39
  -8  -2   3    3.20    0.58
  -7  -2   3   -0.19    0.51
  -6  -2   3  256.40   11.50
  -5  -2   3  135.28    4.80
  -4  -2   3  173.26    6.52
  -3  -2   3  109.51    3.65
  -2  -2   3 2212.58   27.92
  -1  -2   3 1293.04   21.47
   0  -2   3  749.00   29.19
   1  -2   3  651.13   27.05
   2  -2   3   85.62    4.10
   3  -2   3  680.70   13.86
   4  -2   3   69.19    3.82
   5  -2   3   20.91    2.53
   6  -2   3    0.37    1.19
   7  -2   3   21.57    1.84
   8  -2   3   44.20    2.20
   9  -2   3   38.69    4.56
  10  -2   3  208.21    6.28
  11  -2   3  130.64    5.78
  12  -2   3   11.03    1.02
  13  -2   3    2.52    0.83
  14  -2   3   -1.13    1.56
  15  -2   3   34.42    1.26
  16  -2   3   19.09    1.29
  17  -2   3    9.88    1.30
 -19  -3   3    0.13    0.74
 -18  -3   3   29.66    1.00
 -17  -3   3    2.72    1.59
 -16  -3   3    3.88    0.67
 -15  -3   3    7.23    0.65
 -14  -3   3    0.62    0.62
 -13  -3   3    0.57    0.59
 -12  -3   3   25.79    0.94
 -11  -3   3   -0.38    0.57
 -10  -3   3   25.93    1.02
  -9  -3   3    5.58    0.47
  -8  -3   3   77.73    3.06
  -7  -3   3  191.01    6.38
  -6  -3   3  131.66    3.97
  -5  -3   3    7.35    0.49
  -4  -3   3  388.74   10.67
  -3  -3   3  494.18   18.79
  -2  -3   3 1671.64   25.35
  -1  -3   3 1852.69   57.45
   0  -3   3  114.38    4.01
   1  -3   3   71.52    5.55
   2  -3   3    8.59    0.91
   3  -3   3  715.53   25.35
   4  -3   3   34.99    2.30
   5  -3   3    0.14    0.71
   6  -3   3   15.02    1.38
   7  -3   3  111.68    3.42
   8  -3   3    0.56    1.16
   9  -3   3   49.30    1.94
  10  -3   3   -0.13    1.23
  11  -3   3  250.38   12.23
  12  -3   3   30.44    1.39
  13  -3   3    1.50    0.93
  14  -3   3    2.84    0.85
  15  -3   3   52.91    1.31
  16  -3   3    9.06    1.31
 -19  -4   3   -0.36    1.04
 -18  -4   3   10.91    1.22
 -17  -4   3   26.41    0.84
 -16  -4   3    0.59    0.60
 -15  -4   3   -0.57    0.64
 -14  -4   3   10.06    0.82
 -13  -4   3  250.34   12.26
 -12  -4   3   14.55    0.99
 -11  -4   3  131.00    4.96
 -10  -4   3   26.73    0.87
  -9  -4   3  150.53    4.35
  -8  -4   3   -0.13    0.37
  -7  -4   3   26.93    1.08
  -6  -4   3   96.98    2.92
  -5  -4   3  141.90    5.49
  -4  -4   3  297.00    8.83
  -3  -4   3    5.03    0.38
  -2  -4   3  205.76    4.24
  -1  -4   3  745.53   15.94
   0  -4   3  487.14   20.16
   1  -4   3    1.88    0.87
   2  -4   3  294.76   17.55
   3  -4   3  298.72   18.44
   4  -4   3   12.98    0.92
   5  -4   3   68.50    3.46
   6  -4   3    0.82    0.81
   7  -4   3    0.97    1.26
   8  -4   3    3.59    1.03
   9  -4   3   17.89    1.14
  10  -4   3  230.34    9.76
  11  -4   3   30.43    2.09
  12  -4   3   41.39    1.58
  13  -4   3    0.36    0.96
  14  -4   3    0.38    0.97
  15  -4   3    0.12    0.85
  16  -4   3    6.51    0.92
 -18  -5   3    5.14    0.73
 -17  -5   3   -0.54    0.81
 -16  -5   3    3.83    0.78
 -15  -5   3   -0.62    0.77
 -14  -5   3    4.80    0.76
 -13  -5   3  296.39   12.62
 -12  -5   3   11.57    0.62
 -11  -5   3   28.26    0.74
 -10  -5   3    2.14    0.51
  -9  -5   3    4.33    0.44
  -8  -5   3    4.50    0.39
  -7  -5   3   40.72    0.96
  -6  -5   3    0.05    0.32
  -5  -5   3  168.74    5.75
  -4  -5   3    3.03    0.43
  -3  -5   3  255.98    8.36
  -2  -5   3  740.00   30.73
  -1  -5   3 1271.54   29.12
   0  -5   3    1.87    0.60
   1  -5   3   23.71    3.53
   2  -5   3   13.04    1.16
   3  -5   3  195.72    9.50
   4  -5   3   47.86    2.25
   5  -5   3   19.35    0.99
   6  -5   3   73.70    2.33
   7  -5   3   42.95    3.03
   8  -5   3   45.30    2.21
   9  -5   3   33.09    2.10
  10  -5   3  166.68    7.41
  11  -5   3   16.55    1.01
  12  -5   3    3.10    0.84
  13  -5   3    5.41    0.81
  14  -5   3    2.49    1.24
  15  -5   3   16.20    1.33
  16  -5   3    1.72    1.17
 -18  -6   3    1.11    1.30
 -17  -6   3    4.87    0.88
 -16  -6   3    0.21    0.70
 -15  -6   3    1.50    0.61
 -14  -6   3    4.33    0.64
 -13  -6   3  262.82    4.35
 -12  -6   3   23.77    0.73
 -11  -6   3   68.43    1.53
 -10  -6   3   13.24    0.61
  -9  -6   3    4.67    0.47
  -8  -6   3    7.05    0.42
  -7  -6   3   23.15    0.67
  -6  -6   3   24.08    0.99
  -5  -6   3   52.45    2.52
  -4  -6   3  231.40   10.07
  -3  -6   3    0.50    1.06
  -2  -6   3    3.15    0.41
  -1  -6   3  231.75    9.99
   0  -6   3   60.51    2.45
   1  -6   3    3.13    0.89
   2  -6   3   53.07    3.12
   3  -6   3    3.83    0.54
   4  -6   3   58.41    2.03
   5  -6   3   94.18    2.41
   6  -6   3    0.23    0.64
   7  -6   3    9.86    1.23
   8  -6   3    2.55    1.22
   9  -6   3    1.88    1.10
  10  -6   3   38.79    2.06
  11  -6   3    1.02    0.81
  12  -6   3    9.92    0.95
  13  -6   3    4.14    0.80
  14  -6   3   24.59    1.22
  15  -6   3   34.05    1.11
  16  -6   3   45.79    1.45
 -18  -7   3    0.05    0.95
 -17  -7   3   12.26    1.04
 -16  -7   3    1.36    0.97
 -15  -7   3    3.72    0.73
 -14  -7   3   22.18    1.13
 -13  -7   3  178.60    6.43
 -12  -7   3    0.14    0.59
 -11  -7   3  111.81    3.52
 -10  -7   3   50.58    1.27
  -9  -7   3   62.39    1.94
  -8  -7   3    5.05    0.51
  -7  -7   3    1.51    0.39
  -6  -7   3   37.86    1.56
  -5  -7   3    3.83    0.34
  -4  -7   3    2.44    0.32
  -3  -7   3    7.53    0.41
  -2  -7   3  363.98   10.68
  -1  -7   3   19.93    0.97
   0  -7   3  125.51    5.10
   1  -7   3   51.99    1.15
   2  -7   3   12.81    0.92
   3  -7   3  290.44    9.22
   4  -7   3   18.43    1.02
   5  -7   3   21.05    1.08
   6  -7   3   47.50    1.82
   7  -7   3   25.53    1.38
   8  -7   3    6.50    1.29
   9  -7   3   -1.22    1.10
  10  -7   3    2.30    1.22
  11  -7   3   25.81    1.05
  12  -7   3    4.51    0.84
  13  -7   3   54.03    2.30
  14  -7   3    1.67    0.97
  15  -7   3   96.14    1.71
 -17  -8   3    0.61    1.04
 -16  -8   3    6.73    1.00
 -15  -8   3    3.80    0.97
 -14  -8   3   -0.48    0.82
 -13  -8   3   18.35    1.13
 -12  -8   3   27.18    0.83
 -11  -8   3    6.17    0.81
 -10  -8   3  162.99    4.97
  -9  -8   3    4.10    0.59
  -8  -8   3    3.97    0.55
  -7  -8   3   37.90    1.34
  -6  -8   3  255.44   14.92
  -5  -8   3    2.57    0.39
  -4  -8   3   66.47    1.83
  -3  -8   3    5.84    0.48
  -2  -8   3  216.15    9.73
  -1  -8   3   13.82    0.64
   0  -8   3    1.28    0.48
   1  -8   3   31.67    1.04
   2  -8   3    1.36    0.44
   3  -8   3   29.83    1.05
   4  -8   3   23.68    0.96
   5  -8   3  310.32   10.02
   6  -8   3    7.35    1.30
   7  -8   3   49.16    2.50
   8  -8   3   -0.20    0.85
   9  -8   3   39.74    1.87
  10  -8   3   12.28    1.22
  11  -8   3    0.90    0.77
  12  -8   3    9.83    1.61
  13  -8   3    1.12    1.03
  14  -8   3    0.71    1.14
  15  -8   3    8.88    1.34
 -16  -9   3    3.61    1.40
 -15  -9   3    5.13    1.44
 -14  -9   3   -0.35    0.92
 -13  -9   3    8.73    1.16
 -12  -9   3    0.35    0.83
 -11  -9   3    3.05    0.88
 -10  -9   3  168.12    7.33
  -9  -9   3   40.98    1.67
  -8  -9   3    7.97    0.66
  -7  -9   3  110.36    3.79
  -6  -9   3  787.88    9.91
  -5  -9   3   34.15    0.88
  -4  -9   3    5.30    0.54
  -3  -9   3    0.59    0.44
  -2  -9   3    6.93    0.42
  -1  -9   3   82.72    3.10
   0  -9   3  177.91    6.93
   1  -9   3  237.58   11.34
   2  -9   3    0.73    0.56
   3  -9   3   17.35    0.74
   4  -9   3   51.55    1.33
   5  -9   3  515.08   17.80
   6  -9   3   34.61    1.94
   7  -9   3   77.22    3.72
   8  -9   3   13.35    1.30
   9  -9   3   67.34    3.37
  10  -9   3    5.90    1.45
  11  -9   3   89.53    6.09
  12  -9   3   -0.15    1.08
  13  -9   3   20.53    1.23
  14  -9   3    8.98    1.19
 -16 -10   3    1.99    1.05
 -15 -10   3   24.07    1.23
 -14 -10   3    3.38    0.97
 -13 -10   3   11.68    1.03
 -12 -10   3    2.04    0.89
 -11 -10   3    2.55    0.88
 -10 -10   3    4.77    1.01
  -9 -10   3   34.05    1.23
  -8 -10   3  162.74    7.71
  -7 -10   3   72.67    2.99
  -6 -10   3  340.68    9.11
  -5 -10   3   26.47    1.03
  -4 -10   3    0.13    0.48
  -3 -10   3    0.68    0.49
  -2 -10   3    1.79    0.50
  -1 -10   3   63.98    1.65
   0 -10   3   63.97    2.38
   1 -10   3   28.33    0.93
   2 -10   3   54.20    2.23
   3 -10   3   16.43    0.77
   4 -10   3    5.64    1.02
   5 -10   3   94.24    3.97
   6 -10   3   42.99    2.22
   7 -10   3   53.99    1.51
   8 -10   3    2.43    1.45
   9 -10   3    1.38    1.37
  10 -10   3    4.54    2.74
  11 -10   3    5.52    0.91
  12 -10   3    4.22    1.15
  13 -10   3   -0.48    0.95
 -15 -11   3    1.83    1.10
 -14 -11   3    3.15    0.99
 -13 -11   3   -0.25    0.92
 -12 -11   3    2.51    0.95
 -11 -11   3   13.16    1.05
 -10 -11   3    5.51    0.91
  -9 -11   3   19.14    1.11
  -8 -11   3   83.08    2.26
  -7 -11   3  128.88    6.28
  -6 -11   3   -0.71    0.69
  -5 -11   3   21.33    0.99
  -4 -11   3    9.84    0.74
  -3 -11   3    2.25    0.81
  -2 -11   3   -0.36    0.73
  -1 -11   3   11.26    1.00
   0 -11   3   10.64    0.77
   1 -11   3   72.41    5.87
   2 -11   3   42.39    2.91
   3 -11   3   15.01    1.57
   4 -11   3   29.00    2.19
   5 -11   3    1.07    1.03
   6 -11   3    1.44    0.93
   7 -11   3   -0.93    0.92
   8 -11   3   12.20    1.01
   9 -11   3   11.23    1.41
  10 -11   3   -1.35    1.49
  11 -11   3   15.77    1.74
  12 -11   3    0.58    1.11
  13 -11   3    0.50    0.97
 -14 -12   3    7.01    1.12
 -13 -12   3   12.65    1.52
 -12 -12   3    9.56    1.90
 -11 -12   3    1.48    1.02
 -10 -12   3    8.13    1.45
  -9 -12   3   66.46    1.90
  -8 -12   3   38.70    1.36
  -7 -12   3  153.18    6.20
  -6 -12   3   12.07    0.88
  -5 -12   3   61.16    1.49
  -4 -12   3    0.45    1.23
  -3 -12   3    7.62    1.57
  -2 -12   3    0.95    1.15
  -1 -12   3  117.20   11.58
   0 -12   3    3.90    0.77
   1 -12   3    8.17    2.67
   2 -12   3   20.85    1.00
   3 -12   3   79.77    5.25
   4 -12   3  390.53   11.81
   5 -12   3   -0.64    0.87
   6 -12   3    0.60    0.87
   7 -12   3   13.39    0.97
   8 -12   3   -0.15    0.91
   9 -12   3   -0.03    0.94
  10 -12   3   35.02    2.66
  11 -12   3   31.86    2.44
  12 -12   3    7.15    1.05
 -13 -13   3    7.57    1.31
 -12 -13   3    1.51    2.39
 -11 -13   3    0.47    0.99
 -10 -13   3   -0.43    1.01
  -9 -13   3    6.54    1.08
  -8 -13   3   18.17    1.13
  -7 -13   3   15.52    1.57
  -6 -13   3   36.36    1.30
  -5 -13   3   54.61    2.68
  -4 -13   3   15.03    1.05
  -3 -13   3    1.76    1.23
  -2 -13   3   45.99    3.32
  -1 -13   3   64.13    3.48
   0 -13   3   14.88    1.53
   1 -13   3   11.49    2.06
   2 -13   3  100.96    6.70
   3 -13   3    2.84    0.90
   4 -13   3   82.48    2.11
   5 -13   3    1.19    0.90
   6 -13   3   68.19    2.42
   7 -13   3   17.84    1.17
   8 -13   3    7.95    0.95
   9 -13   3   17.79    1.25
  10 -13   3    4.37    1.42
 -12 -14   3   19.37    1.24
 -11 -14   3   -1.28    1.04
 -10 -14   3   12.19    1.22
  -9 -14   3    6.85    1.25
  -8 -14   3   -1.52    0.96
  -7 -14   3   -0.96    1.38
  -6 -14   3   14.37    1.63
  -5 -14   3    5.76    2.74
  -4 -14   3   19.17    2.18
  -3 -14   3   10.93    2.16
  -2 -14   3   22.87    2.46
  -1 -14   3   48.50    5.21
   0 -14   3   10.87    1.38
   1 -14   3   22.53    1.60
   2 -14   3  115.01    7.30
   3 -14   3    0.90    4.84
   4 -14   3    1.14    1.64
   5 -14   3   22.36    2.23
   6 -14   3    0.58    1.52
   7 -14   3    0.89    1.67
   8 -14   3    6.67    1.71
   9 -14   3    2.98    1.82
 -10 -15   3   33.31    2.56
  -9 -15   3    8.25    1.73
  -8 -15   3    3.40    2.34
  -7 -15   3    2.42    3.06
  -6 -15   3   -1.00    1.51
  -5 -15   3   -0.55    2.34
  -4 -15   3    2.43    2.09
  -3 -15   3   38.46    3.03
  -2 -15   3    4.20    2.05
  -1 -15   3   11.16    1.52
   0 -15   3    3.87    1.60
   1 -15   3   35.96    4.67
   2 -15   3   39.25    2.49
   3 -15   3    1.57    2.53
   4 -15   3   13.99    2.89
   5 -15   3   13.51    1.87
   6 -15   3    3.66    3.01
   7 -15   3   24.88    1.90
   8 -15   3   -0.85    1.80
  -8 -16   3    7.77    2.10
  -7 -16   3   -3.17    2.27
  -6 -16   3    4.57    3.13
  -5 -16   3   43.39    4.11
  -4 -16   3   19.08    3.60
  -3 -16   3   37.96    2.80
  -2 -16   3   20.50    1.83
  -1 -16   3   40.48    5.37
   0 -16   3    0.27    1.64
   1 -16   3    7.61    1.59
   2 -16   3   18.96    3.67
   3 -16   3   14.67    3.38
   4 -16   3    3.37    3.90
   5 -16   3    3.94    1.85
   6 -16   3    4.45    1.81
  -5 -17   3   17.79    3.34
  -4 -17   3   26.64    3.19
  -3 -17   3   44.87    2.37
  -2 -17   3   21.09    1.92
  -1 -17   3   -2.25    2.78
   0 -17   3    0.57    1.83
   1 -17   3   -0.57    3.13
   2 -17   3   -1.39    2.95
 -18   0   4   30.03    1.63
 -16   0   4   11.80    1.06
 -14   0   4    7.94    0.92
 -12   0   4   10.32    0.85
 -10   0   4   81.29    1.94
  -8   0   4  204.98    6.97
  -6   0   4   93.56    6.22
  -4   0   4   -0.01    0.79
  -2   0   4 2946.71  271.16
   0   0   4   36.35    4.60
   2   0   4  102.68    6.01
   4   0   4  682.17   42.48
   6   0   4  102.81    5.30
   8   0   4   18.04    2.66
  10   0   4  357.33   17.69
  12   0   4   -0.11    1.58
  14   0   4   -0.73    1.50
  16   0   4    7.65    3.30
 -19  -1   4   -0.07    0.92
 -18  -1   4   -1.26    0.95
 -17  -1   4    4.38    0.65
 -16  -1   4   10.20    0.69
 -15  -1   4    0.12    0.61
 -14  -1   4    9.42    0.62
 -13  -1   4   20.74    0.80
 -12  -1   4    3.37    0.55
 -11  -1   4    3.17    0.58
 -10  -1   4   38.84    0.97
  -9  -1   4   53.29    0.82
  -8  -1   4    2.76    0.36
  -7  -1   4  252.53    4.55
  -6  -1   4  307.20    8.97
  -5  -1   4  194.11    5.27
  -4  -1   4  167.88    6.73
  -3  -1   4   46.85    2.49
  -2  -1   4    3.94    0.81
  -1  -1   4   67.21    2.84
   0  -1   4   46.32    2.34
   1  -1   4    3.25    0.95
   2  -1   4    0.97    0.94
   3  -1   4   -1.59    1.58
   4  -1   4  284.38    9.20
   5  -1   4  116.05    7.59
   6  -1   4   11.33    1.42
   7  -1   4    1.69    1.04
   8  -1   4   24.86    1.74
   9  -1   4   33.14    1.68
  10  -1   4    6.10    1.15
  11  -1   4   26.08    1.56
  12  -1   4   12.04    1.06
  13  -1   4    1.62    0.99
  14  -1   4   12.93    1.04
  15  -1   4   13.75    1.08
  16  -1   4    3.45    1.57
 -19  -2   4   17.21    1.06
 -18  -2   4    0.61    0.77
 -17  -2   4    5.76    0.66
 -16  -2   4   -0.79    0.70
 -15  -2   4   88.98    3.10
 -14  -2   4   22.96    0.80
 -13  -2   4    8.99    0.64
 -12  -2   4   11.16    0.68
 -11  -2   4   35.60    0.85
 -10  -2   4  124.60    2.30
  -9  -2   4  120.40    2.56
  -8  -2   4  587.67   15.27
  -7  -2   4   19.54    0.96
  -6  -2   4   91.43    3.33
  -5  -2   4  314.40    4.69
  -4  -2   4    1.57    0.36
  -3  -2   4  117.06    3.94
  -2  -2   4 1146.44   32.58
  -1  -2   4 1711.12   33.77
   0  -2   4    0.78    0.78
   1  -2   4   64.31    3.59
   2  -2   4   58.06    2.91
   3  -2   4   34.21    2.65
   4  -2   4  141.82    5.66
   5  -2   4    3.67    1.39
   6  -2   4    0.21    1.35
   7  -2   4    5.48    1.76
   8  -2   4   16.34    1.61
   9  -2   4   41.64    1.97
  10  -2   4  151.48    5.89
  11  -2   4  125.67    3.13
  12  -2   4    1.54    1.06
  13  -2   4   24.66    2.06
  14  -2   4    1.33    1.04
  15  -2   4    0.68    0.99
  16  -2   4   10.77    1.10
 -19  -3   4   -0.94    0.96
 -18  -3   4   19.44    1.29
 -17  -3   4    1.06    0.72
 -16  -3   4    1.04    0.64
 -15  -3   4   98.28    3.44
 -14  -3   4  101.90    1.93
 -13  -3   4   97.20    4.02
 -12  -3   4   24.11    1.04
 -11  -3   4   12.27    0.64
 -10  -3   4    0.81    0.46
  -9  -3   4   17.20    0.67
  -8  -3   4  121.67    2.59
  -7  -3   4    0.08    0.37
  -6  -3   4    7.50    0.70
  -5  -3   4    3.23    0.41
  -4  -3   4  222.80    7.37
  -3  -3   4  372.39   11.87
  -2  -3   4  245.30    8.06
  -1  -3   4   82.64    2.75
   0  -3   4    6.69    0.69
   1  -3   4   42.19    2.69
   2  -3   4    8.53    1.07
   3  -3   4   45.42    2.63
   4  -3   4    2.33    1.12
   5  -3   4    7.72    1.00
   6  -3   4   81.88    2.43
   7  -3   4   17.12    3.01
   8  -3   4   24.42    3.28
   9  -3   4   68.43    4.63
  10  -3   4    0.44    1.15
  11  -3   4   79.41    2.53
  12  -3   4   11.35    1.05
  13  -3   4    0.32    1.47
  14  -3   4    4.82    0.99
  15  -3   4   24.31    1.15
  16  -3   4    6.75    1.04
 -19  -4   4   16.78    1.19
 -18  -4   4    0.77    0.93
 -17  -4   4   36.31    0.94
 -16  -4   4    1.51    0.62
 -15  -4   4    1.48    0.97
 -14  -4   4   10.12    0.79
 -13  -4   4    2.10    0.71
 -12  -4   4   25.20    1.02
 -11  -4   4    3.17    0.55
 -10  -4   4   -0.07    0.48
  -9  -4   4  102.61    1.59
  -8  -4   4   57.60    1.46
  -7  -4   4   52.24    1.86
  -6  -4   4   14.81    0.81
  -5  -4   4    0.99    0.36
  -4  -4   4  256.94    9.05
  -3  -4   4 1020.94   24.57
  -2  -4   4  603.62   20.22
  -1  -4   4 1432.92   54.65
   0  -4   4   58.97    2.39
   1  -4   4  159.91    7.92
   2  -4   4   56.73    2.82
   3  -4   4   55.13    5.30
   4  -4   4   68.20    2.07
   5  -4   4   -1.40    0.66
   6  -4   4    0.97    1.28
   7  -4   4   52.75    2.46
   8  -4   4   36.60    2.39
   9  -4   4   14.42    1.77
  10  -4   4   40.87    3.59
  11  -4   4  100.24    3.32
  12  -4   4   62.68    1.75
  13  -4   4   18.09    2.42
  14  -4   4   28.61    1.36
  15  -4   4    0.25    1.04
 -19  -5   4   42.09    1.93
 -18  -5   4    4.97    0.81
 -17  -5   4    0.85    0.81
 -16  -5   4    8.02    0.83
 -15  -5   4   54.45    1.33
 -14  -5   4    6.34    0.79
 -13  -5   4   18.78    0.77
 -12  -5   4   27.91    0.88
 -11  -5   4    0.16    0.48
 -10  -5   4   49.00    1.15
  -9  -5   4   -0.12    0.38
  -8  -5   4    8.14    0.42
  -7  -5   4  187.75    6.89
  -6  -5   4   39.37    1.41
  -5  -5   4   47.58    1.67
  -4  -5   4  248.21    6.85
  -3  -5   4  351.51    5.69
  -2  -5   4   22.01    0.92
  -1  -5   4 2028.74   51.12
   0  -5   4  135.96    5.58
   1  -5   4   21.14    1.54
   2  -5   4  261.50   18.20
   3  -5   4    6.45    1.60
   4  -5   4   10.00    0.87
   5  -5   4   44.35    1.73
   6  -5   4   34.50    1.75
   7  -5   4   13.58    1.10
   8  -5   4   11.49    1.62
   9  -5   4  134.25    6.92
  10  -5   4  242.41    9.77
  11  -5   4   69.87    2.91
  12  -5   4    4.24    0.93
  13  -5   4    1.16    0.91
  14  -5   4    1.31    1.16
  15  -5   4   18.83    1.31
 -18  -6   4    6.22    1.27
 -17  -6   4    6.30    1.11
 -16  -6   4   21.92    1.13
 -15  -6   4   18.64    0.78
 -14  -6   4   19.13    0.78
 -13  -6   4   44.96    1.02
 -12  -6   4   16.88    0.73
 -11  -6   4    2.43    0.56
 -10  -6   4  318.61   10.05
  -9  -6   4  103.05    2.25
  -8  -6   4    2.65    0.43
  -7  -6   4   12.37    0.45
  -6  -6   4   84.70    2.88
  -5  -6   4  217.75    7.90
  -4  -6   4  101.15    2.83
  -3  -6   4  404.32    9.80
  -2  -6   4  301.23    8.42
  -1  -6   4  458.90   12.49
   0  -6   4  342.32    8.30
   1  -6   4   85.41    3.95
   2  -6   4   10.88    0.96
   3  -6   4   28.60    2.14
   4  -6   4   24.72    1.85
   5  -6   4  107.72    4.62
   6  -6   4   -0.32    0.93
   7  -6   4   26.53    1.34
   8  -6   4   22.29    1.30
   9  -6   4   -0.01    2.78
  10  -6   4   19.77    1.53
  11  -6   4    3.64    1.23
  12  -6   4    2.42    0.84
  13  -6   4    6.10    0.99
  14  -6   4   11.64    0.95
  15  -6   4    4.35    0.96
 -18  -7   4   37.94    3.06
 -17  -7   4   11.58    1.68
 -16  -7   4   11.34    1.03
 -15  -7   4   18.37    0.81
 -14  -7   4    0.92    0.65
 -13  -7   4   45.93    1.04
 -12  -7   4   41.30    1.06
 -11  -7   4    0.92    0.62
 -10  -7   4  328.21    6.90
  -9  -7   4  162.72    5.16
  -8  -7   4    4.83    0.56
  -7  -7   4  143.57    4.55
  -6  -7   4   17.09    0.87
  -5  -7   4   27.31    1.26
  -4  -7   4    7.88    0.56
  -3  -7   4   94.29    2.92
  -2  -7   4   77.57    2.57
  -1  -7   4    6.09    0.45
   0  -7   4   12.60    0.77
   1  -7   4   86.57    2.37
   2  -7   4   12.17    0.79
   3  -7   4   27.64    2.67
   4  -7   4  144.35   10.51
   5  -7   4   97.41    4.48
   6  -7   4   50.52    1.73
   7  -7   4   -0.70    0.80
   8  -7   4    7.83    0.93
   9  -7   4  134.36    4.32
  10  -7   4    4.86    1.24
  11  -7   4    1.92    1.17
  12  -7   4    0.03    1.02
  13  -7   4   28.26    1.23
  14  -7   4    0.03    1.08
 -17  -8   4   15.38    1.15
 -16  -8   4   -0.09    1.08
 -15  -8   4    6.50    0.95
 -14  -8   4  100.41    3.42
 -13  -8   4   82.24    1.84
 -12  -8   4   67.22    2.06
 -11  -8   4   -0.01    0.67
 -10  -8   4   95.56    3.06
  -9  -8   4  194.57    4.74
  -8  -8   4   23.11    0.80
  -7  -8   4    1.18    0.45
  -6  -8   4   72.04    1.70
  -5  -8   4    3.01    0.36
  -4  -8   4    3.52    0.33
  -3  -8   4    0.49    0.33
  -2  -8   4  213.67    6.74
  -1  -8   4    1.62    0.41
   0  -8   4    0.00    0.44
   1  -8   4   33.55    1.45
   2  -8   4   80.75    3.48
   3  -8   4   41.20    1.47
   4  -8   4    1.15    0.65
   5  -8   4  144.42    4.36
   6  -8   4  100.93    3.42
   7  -8   4    1.27    0.79
   8  -8   4   22.83    1.12
   9  -8   4    6.88    0.90
  10  -8   4   32.21    1.71
  11  -8   4   20.82    1.37
  12  -8   4    1.85    1.69
  13  -8   4    4.69    1.07
  14  -8   4   -0.20    1.04
 -17  -9   4    0.74    1.79
 -16  -9   4    2.37    1.64
 -15  -9   4    2.39    0.96
 -14  -9   4   16.31    1.10
 -13  -9   4    9.77    0.93
 -12  -9   4   58.24    1.52
 -11  -9   4   18.68    1.05
 -10  -9   4    5.83    1.26
  -9  -9   4  199.48    6.90
  -8  -9   4   99.69    3.93
  -7  -9   4   25.10    0.93
  -6  -9   4  114.13    3.66
  -5  -9   4   54.70    1.58
  -4  -9   4    0.74    0.42
  -3  -9   4    3.88    0.49
  -2  -9   4   62.76    2.39
  -1  -9   4    2.85    0.57
   0  -9   4    4.90    0.59
   1  -9   4    7.42    0.73
   2  -9   4  134.19    7.66
   3  -9   4   16.45    1.01
   4  -9   4   97.46    4.14
   5  -9   4   63.21    2.85
   6  -9   4   15.27    1.18
   7  -9   4    3.85    1.22
   8  -9   4    5.35    1.26
   9  -9   4   22.11    1.12
  10  -9   4   10.97    1.00
  11  -9   4   -2.61    1.52
  12  -9   4    3.23    2.28
  13  -9   4    4.86    1.16
 -16 -10   4   24.36    1.28
 -15 -10   4   -0.44    1.07
 -14 -10   4   11.68    1.03
 -13 -10   4    3.01    0.94
 -12 -10   4   38.09    1.28
 -11 -10   4   -1.10    0.85
 -10 -10   4   21.49    1.07
  -9 -10   4   48.86    2.14
  -8 -10   4   49.85    2.11
  -7 -10   4    3.67    0.69
  -6 -10   4    4.38    0.71
  -5 -10   4    0.72    0.50
  -4 -10   4   56.92    2.88
  -3 -10   4    2.57    0.53
  -2 -10   4    9.83    0.55
  -1 -10   4   15.23    0.72
   0 -10   4   50.31    2.21
   1 -10   4  104.15    3.69
   2 -10   4   65.12    2.77
   3 -10   4  255.16   13.02
   4 -10   4   43.28    3.76
   5 -10   4   10.28    1.00
   6 -10   4    0.80    0.90
   7 -10   4   30.20    1.40
   8 -10   4    2.89    0.90
   9 -10   4    6.18    0.88
  10 -10   4    0.30    1.52
  11 -10   4   51.62    2.32
  12 -10   4   -1.22    1.73
  13 -10   4   14.69    3.10
 -15 -11   4    2.86    1.05
 -14 -11   4   35.73    1.48
 -13 -11   4    5.32    1.07
 -12 -11   4   27.00    1.18
 -11 -11   4   28.48    1.52
 -10 -11   4   35.10    1.23
  -9 -11   4   37.51    1.34
  -8 -11   4   47.12    1.42
  -7 -11   4   91.49    2.36
  -6 -11   4    5.72    0.91
  -5 -11   4   10.76    0.80
  -4 -11   4    9.43    0.69
  -3 -11   4  262.06   10.94
  -2 -11   4    4.55    0.58
  -1 -11   4    6.76    1.45
   0 -11   4   24.01    1.25
   2 -11   4   14.33    1.00
   3 -11   4  203.62   14.71
   4 -11   4  104.28    2.74
   5 -11   4    1.98    0.94
   6 -11   4    7.61    1.02
   7 -11   4    7.45    0.91
   8 -11   4   57.03    3.37
   9 -11   4    1.96    1.00
  10 -11   4   -1.51    1.34
  11 -11   4   -3.21    1.80
  12 -11   4   -3.46    1.90
 -14 -12   4    2.61    1.11
 -13 -12   4    8.02    1.10
 -12 -12   4    1.16    1.26
 -11 -12   4   19.06    1.12
 -10 -12   4   14.88    1.52
  -9 -12   4   17.54    1.11
  -8 -12   4   81.14    2.49
  -7 -12   4   34.16    1.31
  -6 -12   4    0.47    0.93
  -5 -12   4    0.51    0.85
  -4 -12   4   77.74    3.88
  -3 -12   4    2.19    1.44
  -2 -12   4   26.53    1.86
  -1 -12   4   41.21    8.79
   0 -12   4    3.74    1.39
   1 -12   4   -0.10    0.80
   2 -12   4   40.66    1.96
   3 -12   4  399.37   21.31
   4 -12   4   13.55    1.05
   5 -12   4   88.61    3.22
   6 -12   4    4.34    1.02
   7 -12   4    0.39    1.42
   8 -12   4   -1.26    0.90
   9 -12   4   -0.50    1.61
  10 -12   4   34.90    2.49
  11 -12   4   -0.34    1.60
 -13 -13   4   13.92    1.31
 -12 -13   4    3.70    1.08
 -11 -13   4    1.65    1.08
 -10 -13   4    1.37    1.01
  -9 -13   4    0.89    0.96
  -8 -13   4    6.92    1.03
  -7 -13   4    1.65    0.94
  -6 -13   4    2.91    1.05
  -5 -13   4    9.23    1.79
  -4 -13   4   21.64    1.56
  -3 -13   4   -0.67    0.94
  -2 -13   4    3.06    1.50
  -1 -13   4   17.01    1.98
   0 -13   4    3.67    1.69
   1 -13   4   13.24    1.64
   2 -13   4   12.87    4.78
   3 -13   4   14.83    1.34
   4 -13   4   10.36    1.23
   5 -13   4    0.18    0.95
   6 -13   4   13.32    1.04
   7 -13   4    3.58    1.86
   8 -13   4   26.54    1.22
   9 -13   4    1.18    1.03
  10 -13   4    0.78    1.12
 -12 -14   4   17.83    1.83
 -11 -14   4   16.11    2.84
 -10 -14   4    6.32    1.10
  -9 -14   4    4.38    1.08
  -8 -14   4    0.28    1.07
  -7 -14   4   -0.77    1.02
  -6 -14   4   48.34    2.13
  -5 -14   4   -1.20    1.28
  -4 -14   4   44.19    4.10
  -3 -14   4   18.05    2.07
  -2 -14   4   65.17    4.20
  -1 -14   4   19.15    2.22
   0 -14   4    3.94    1.40
   1 -14   4    4.87    1.38
   2 -14   4   12.32    1.57
   3 -14   4   13.91    1.69
   4 -14   4    0.80    2.79
   5 -14   4   12.04    1.75
   6 -14   4   77.57    2.75
   7 -14   4   15.58    1.75
   8 -14   4    8.92    1.85
 -10 -15   4    9.18    2.27
  -9 -15   4   -0.22    1.90
  -8 -15   4   -0.94    1.63
  -7 -15   4   11.34    1.65
  -6 -15   4   15.46    1.62
  -5 -15   4    8.75    2.06
  -4 -15   4   47.08    2.26
  -3 -15   4   -0.36    1.98
  -2 -15   4   19.78    2.30
  -1 -15   4    3.94    2.13
   0 -15   4   13.02    1.61
   1 -15   4    1.96    2.97
   2 -15   4   47.81    7.66
   3 -15   4   -1.50    1.61
   4 -15   4    5.09    2.14
   5 -15   4    6.43    1.97
   6 -15   4   70.91    2.74
   7 -15   4   -1.83    3.05
  -8 -16   4    3.35    2.44
  -7 -16   4    2.45    1.86
  -6 -16   4   32.67    3.71
  -5 -16   4    2.40    1.80
  -4 -16   4    2.55    2.95
  -3 -16   4    6.09    2.38
  -2 -16   4  107.79    4.72
  -1 -16   4   19.38    2.80
   0 -16   4    5.42    1.63
   1 -16   4    7.90    1.67
   2 -16   4   18.21    3.99
   3 -16   4    1.03    1.84
   4 -16   4   21.11    2.83
  -4 -17   4    7.43    2.80
  -3 -17   4    0.81    2.66
  -2 -17   4   13.96    1.86
  -1 -17   4    7.45    2.49
   0 -17   4    0.02    1.95
 -18   0   5   -1.31    1.27
 -16   0   5   -0.55    0.77
 -14   0   5   -0.02    0.74
 -12   0   5   -0.35    0.91
 -10   0   5   -0.32    0.55
  -8   0   5   -0.72    0.42
  -6   0   5    0.20    0.84
  -4   0   5    0.19    0.42
  -2   0   5   -0.49    1.35
   2   0   5   -1.03    2.46
   4   0   5   -0.42    1.45
   6   0   5    0.51    1.96
   8   0   5    0.62    2.26
  10   0   5   -0.19    1.72
  12   0   5    2.45    3.23
  14   0   5   -0.80    2.28
 -19  -1   5    6.40    0.97
 -18  -1   5    2.92    0.89
 -17  -1   5   -1.25    0.71
 -16  -1   5    2.41    0.61
 -15  -1   5  154.81    5.10
 -14  -1   5   15.48    0.67
 -13  -1   5   49.13    1.86
 -12  -1   5    8.85    0.55
 -11  -1   5   10.21    0.54
 -10  -1   5   21.78    0.51
  -9  -1   5   84.29    1.72
  -8  -1   5  169.19    3.89
  -7  -1   5   37.20    1.52
  -6  -1   5  208.35    5.66
  -5  -1   5    4.00    0.53
  -4  -1   5    6.13    0.74
  -3  -1   5  225.14    4.43
  -2  -1   5  141.76    4.89
  -1  -1   5    0.01    0.60
   0  -1   5   28.66    1.93
   1  -1   5   21.04    2.03
   2  -1   5  921.00   20.86
   3  -1   5    2.85    1.62
   4  -1   5   73.27    4.21
   5  -1   5    3.01    1.16
   6  -1   5   50.29    3.40
   7  -1   5    4.17    1.42
   8  -1   5    7.07    1.59
   9  -1   5  257.53   10.56
  10  -1   5   -0.99    1.26
  11  -1   5   11.09    1.88
  12  -1   5   -0.49    1.10
  13  -1   5   13.69    1.69
  14  -1   5    1.12    1.05
  15  -1   5   12.49    1.18
 -19  -2   5    1.18    1.41
 -18  -2   5    0.95    0.91
 -17  -2   5    5.56    2.22
 -16  -2   5    2.82    0.76
 -15  -2   5    3.93    0.58
 -14  -2   5    1.12    0.58
 -13  -2   5    5.97    0.58
 -12  -2   5   11.50    0.59
 -11  -2   5   32.61    0.80
 -10  -2   5   70.37    2.40
  -9  -2   5    2.69    0.39
  -8  -2   5   76.36    2.40
  -7  -2   5  304.58    9.30
  -6  -2   5  168.17    6.84
  -5  -2   5   26.98    1.23
  -4  -2   5   54.45    2.25
  -3  -2   5 1020.75   27.01
  -2  -2   5  243.35    8.24
  -1  -2   5    0.05    0.76
   0  -2   5   14.89    1.56
   1  -2   5    0.60    0.90
   2  -2   5   63.73    3.63
   3  -2   5  250.36   13.33
   4  -2   5  418.94   19.09
   5  -2   5    1.99    1.34
   6  -2   5   10.88    1.83
   7  -2   5   -2.08    1.68
   8  -2   5  120.30    5.51
   9  -2   5  347.18   14.76
  10  -2   5    5.06    1.42
  11  -2   5   14.57    1.25
  12  -2   5    0.49    1.10
  13  -2   5    2.84    1.08
  14  -2   5   35.25    1.64
  15  -2   5    4.33    1.05
 -19  -3   5   -0.59    1.08
 -18  -3   5    2.10    0.95
 -17  -3   5   27.71    1.28
 -16  -3   5    0.67    0.65
 -15  -3   5   59.80    2.16
 -14  -3   5   13.17    0.67
 -13  -3   5   76.19    2.85
 -12  -3   5   24.09    0.93
 -11  -3   5   23.76    0.81
 -10  -3   5   68.29    2.56
  -9  -3   5   47.20    1.12
  -8  -3   5   22.31    0.60
  -7  -3   5   45.65    1.88
  -6  -3   5   69.63    2.71
  -5  -3   5   82.39    2.69
  -4  -3   5    2.04    1.01
  -3  -3   5  221.30    4.28
  -2  -3   5  198.48    5.13
  -1  -3   5   12.62    1.03
   0  -3   5   10.02    1.70
   1  -3   5  676.43   23.99
   2  -3   5   34.23    2.14
   3  -3   5   11.93    1.19
   4  -3   5  210.98    6.19
   5  -3   5  204.42    5.75
   6  -3   5    6.75    1.20
   7  -3   5    2.50    1.46
   8  -3   5   29.82    2.40
   9  -3   5  113.90    8.72
  10  -3   5   21.02    2.38
  11  -3   5    1.05    1.30
  12  -3   5    7.10    1.35
  13  -3   5    8.05    1.00
  14  -3   5   10.98    1.12
  15  -3   5    7.22    1.13
 -19  -4   5    2.64    1.44
 -18  -4   5    0.79    0.94
 -17  -4   5    0.31    0.85
 -16  -4   5    0.31    0.97
 -15  -4   5   36.81    1.48
 -14  -4   5    6.10    0.73
 -13  -4   5   75.78    3.57
 -12  -4   5    7.51    1.08
 -11  -4   5   28.53    0.79
 -10  -4   5  137.71    3.41
  -9  -4   5   81.30    2.79
  -8  -4   5   -0.12    0.33
  -7  -4   5   45.57    0.81
  -6  -4   5    1.47    0.76
  -5  -4   5   59.10    2.08
  -4  -4   5  183.37    6.75
  -3  -4   5  251.86    5.53
  -2  -4   5 1033.93   26.14
  -1  -4   5  877.74   20.42
   0  -4   5   42.14    1.73
   1  -4   5   30.32    1.50
   2  -4   5  181.78    7.66
   3  -4   5   35.01    1.60
   4  -4   5   14.68    1.27
   5  -4   5   12.31    1.29
   6  -4   5    6.35    1.13
   7  -4   5   20.69    1.59
   8  -4   5   -0.13    1.03
   9  -4   5    1.56    1.67
  10  -4   5  395.37   22.08
  11  -4   5    8.18    1.96
  12  -4   5   17.67    1.50
  13  -4   5    1.59    1.24
  14  -4   5    6.11    1.29
  15  -4   5   31.70    1.23
 -19  -5   5    0.30    1.44
 -18  -5   5    2.02    1.69
 -17  -5   5    1.95    1.26
 -16  -5   5   13.41    1.36
 -15  -5   5   14.30    0.91
 -14  -5   5    5.20    0.77
 -13  -5   5   26.27    1.00
 -12  -5   5   16.02    0.93
 -11  -5   5   65.70    1.33
 -10  -5   5   14.71    0.55
  -9  -5   5   69.41    2.41
  -8  -5   5   33.90    0.62
  -7  -5   5    5.50    0.36
  -6  -5   5    1.63    0.39
  -5  -5   5  114.98    3.51
  -4  -5   5  190.49    9.18
  -3  -5   5   26.18    1.07
  -2  -5   5  582.15   23.05
  -1  -5   5  228.16   11.22
   0  -5   5   41.79    2.09
   1  -5   5    4.45    0.64
   2  -5   5   23.78    0.96
   3  -5   5   39.12    1.70
   4  -5   5   26.83    1.40
   5  -5   5   35.20    1.92
   6  -5   5    1.54    1.61
   7  -5   5   -0.85    1.19
   8  -5   5   14.47    1.19
   9  -5   5   -0.61    1.01
  10  -5   5   62.23    3.54
  11  -5   5    2.13    1.44
  12  -5   5    1.57    0.99
  13  -5   5    0.19    0.97
  14  -5   5    9.22    1.57
 -18  -6   5    0.32    1.42
 -17  -6   5    0.15    1.00
 -16  -6   5    7.94    0.72
 -15  -6   5   -0.26    0.66
 -14  -6   5   13.50    0.77
 -13  -6   5  129.80    3.15
 -12  -6   5   15.65    0.72
 -11  -6   5   81.92    2.83
 -10  -6   5    5.54    0.49
  -9  -6   5    2.88    0.45
  -8  -6   5   16.19    0.49
  -7  -6   5   70.97    2.20
  -6  -6   5  118.10    2.86
  -5  -6   5    0.00    0.31
  -4  -6   5    2.53    0.36
  -3  -6   5  954.48   19.20
  -2  -6   5  711.56   18.53
  -1  -6   5  977.42   20.04
   0  -6   5  208.10    8.18
   1  -6   5   26.44    0.87
   2  -6   5  213.86    4.79
   3  -6   5    7.03    0.73
   4  -6   5  268.38    7.66
   5  -6   5   68.47    2.52
   6  -6   5   84.71    2.92
   7  -6   5   12.51    1.03
   8  -6   5    6.77    1.36
   9  -6   5   16.49    1.33
  10  -6   5   43.71    3.29
  11  -6   5   20.54    1.59
  12  -6   5    9.71    1.45
  13  -6   5   32.60    1.28
  14  -6   5    3.18    1.03
 -18  -7   5    8.84    1.28
 -17  -7   5    1.59    1.72
 -16  -7   5    5.31    0.89
 -15  -7   5   29.83    1.07
 -14  -7   5   35.71    0.99
 -13  -7   5  221.32    7.85
 -12  -7   5   19.19    0.87
 -11  -7   5   93.69    3.76
 -10  -7   5   22.59    0.74
  -9  -7   5   91.46    3.00
  -8  -7   5  282.25    5.87
  -7  -7   5   12.75    0.59
  -6  -7   5    1.16    0.32
  -5  -7   5   77.91    2.72
  -4  -7   5   33.67    1.10
  -3  -7   5    6.19    0.48
  -2  -7   5 1478.88   51.97
  -1  -7   5  123.64    2.18
   0  -7   5   30.76    1.24
   1  -7   5  106.23    4.01
   2  -7   5    8.49    0.96
   3  -7   5   79.00    5.59
   4  -7   5   83.75    4.17
   5  -7   5   22.59    1.35
   6  -7   5   47.58    2.71
   7  -7   5    3.42    0.99
   8  -7   5   16.39    1.56
   9  -7   5  113.85    4.73
  10  -7   5    2.87    0.93
  11  -7   5   45.11    2.11
  12  -7   5    5.78    1.69
  13  -7   5   25.15    1.16
  14  -7   5   23.90    1.33
 -17  -8   5   -0.31    1.01
 -16  -8   5    8.18    1.04
 -15  -8   5   79.12    3.15
 -14  -8   5   96.21    3.56
 -13  -8   5  120.36    3.69
 -12  -8   5   69.40    2.82
 -11  -8   5   53.22    1.41
 -10  -8   5    6.75    0.70
  -9  -8   5    0.03    0.55
  -8  -8   5   20.29    0.68
  -7  -8   5  279.37    8.48
  -6  -8   5   -0.10    0.44
  -5  -8   5    2.95    0.41
  -4  -8   5  247.19   13.19
  -3  -8   5    1.39    0.42
  -2  -8   5  228.87    8.11
  -1  -8   5   11.58    0.76
   0  -8   5   53.44    2.18
   1  -8   5  118.86    4.95
   2  -8   5    1.88    0.82
   3  -8   5  130.01    9.13
   4  -8   5   50.41    3.01
   5  -8   5  112.46    4.47
   6  -8   5  158.07    6.64
   7  -8   5    4.39    0.91
   8  -8   5    0.00    0.97
   9  -8   5    8.20    1.00
  10  -8   5   25.29    1.17
  11  -8   5    8.70    1.39
  12  -8   5    6.75    1.81
  13  -8   5    6.75    1.83
 -17  -9   5    5.95    1.13
 -16  -9   5    7.81    1.47
 -15  -9   5    0.79    1.00
 -14  -9   5  247.91    9.28
 -13  -9   5   11.31    1.07
 -12  -9   5    2.59    0.95
 -11  -9   5  119.16    5.21
 -10  -9   5    9.11    1.03
  -9  -9   5   96.98    6.79
  -8  -9   5  381.55   10.42
  -7  -9   5  173.90    5.43
  -6  -9   5   21.10    0.67
  -5  -9   5   35.74    1.40
  -4  -9   5    0.32    0.46
  -3  -9   5    2.87    0.77
  -2  -9   5   34.85    2.15
  -1  -9   5   10.21    0.67
   0  -9   5   74.13    2.89
   1  -9   5  125.15    4.84
   2  -9   5    0.44    0.77
   3  -9   5  303.42    8.50
   4  -9   5   54.52    4.78
   5  -9   5   63.59    4.34
   6  -9   5   55.41    3.20
   7  -9   5   27.71    1.29
   8  -9   5   66.06    1.76
   9  -9   5   12.14    1.04
  10  -9   5    1.33    1.00
  11  -9   5   10.40    1.35
  12  -9   5    3.29    3.19
  13  -9   5   -2.20    2.43
 -16 -10   5    1.01    1.11
 -15 -10   5    1.83    1.13
 -14 -10   5   30.45    1.28
 -13 -10   5   -1.64    1.52
 -12 -10   5    3.54    0.99
 -11 -10   5    2.85    0.95
 -10 -10   5   22.54    1.10
  -9 -10   5    2.46    0.88
  -8 -10   5  100.55    4.96
  -7 -10   5   10.68    0.67
  -6 -10   5  141.47    4.16
  -5 -10   5    2.28    0.54
  -4 -10   5    0.20    0.48
  -3 -10   5    3.53    0.74
  -2 -10   5    2.99    0.94
  -1 -10   5    7.26    1.24
   0 -10   5    1.93    0.64
   1 -10   5  173.84   10.10
   2 -10   5  187.87   10.12
   3 -10   5   41.92    6.86
   4 -10   5   99.88    9.85
   5 -10   5  237.80    8.74
   6 -10   5    0.88    0.89
   7 -10   5    6.21    1.00
   8 -10   5   -0.35    0.93
   9 -10   5   -1.26    0.92
  10 -10   5   61.51    3.08
  11 -10   5   -1.50    1.87
  12 -10   5   14.48    2.23
 -15 -11   5   17.89    1.34
 -14 -11   5   14.28    1.23
 -13 -11   5    0.39    1.61
 -12 -11   5    1.12    1.68
 -11 -11   5    9.59    1.08
 -10 -11   5    3.98    1.18
  -9 -11   5   18.79    1.07
  -8 -11   5    0.45    0.89
  -7 -11   5  127.76    4.80
  -6 -11   5    2.86    0.87
  -5 -11   5   22.83    0.90
  -4 -11   5    3.30    1.10
  -3 -11   5   -0.66    0.59
  -2 -11   5    4.24    0.87
  -1 -11   5   30.96    3.19
   0 -11   5    0.54    0.97
   1 -11   5  159.23   11.28
   2 -11   5   10.63    1.93
   3 -11   5   13.00    2.71
   4 -11   5  224.14    9.32
   5 -11   5   22.89    1.41
   6 -11   5    8.04    1.04
   7 -11   5   -0.34    0.85
   8 -11   5    2.44    0.95
   9 -11   5    4.41    1.00
  10 -11   5    3.66    0.99
  11 -11   5   21.88    1.20
 -14 -12   5    0.61    1.52
 -13 -12   5   18.89    1.83
 -12 -12   5   30.75    1.95
 -11 -12   5   12.74    1.16
 -10 -12   5   43.86    1.54
  -9 -12   5   11.45    1.04
  -8 -12   5   10.09    0.96
  -7 -12   5  136.88    5.58
  -6 -12   5   74.71    3.25
  -5 -12   5    7.01    0.94
  -4 -12   5    0.68    0.92
  -3 -12   5   14.79    1.12
  -2 -12   5   52.89    6.96
  -1 -12   5   26.94    1.12
   0 -12   5   66.35    2.25
   1 -12   5   35.36    2.78
   2 -12   5   25.55    2.72
   3 -12   5    4.37    0.97
   4 -12   5    3.10    1.18
   5 -12   5    6.39    1.07
   6 -12   5   39.17    1.47
   7 -12   5    2.68    1.02
   8 -12   5   11.46    1.14
   9 -12   5    2.21    1.11
  10 -12   5   16.75    3.06
 -13 -13   5    0.66    2.14
 -12 -13   5    8.35    1.28
 -11 -13   5    2.78    1.93
 -10 -13   5    8.83    1.14
  -9 -13   5   -0.77    0.97
  -8 -13   5    8.30    1.03
  -7 -13   5   78.81    2.69
  -6 -13   5   10.55    1.05
  -5 -13   5    6.29    1.01
  -4 -13   5   13.84    1.35
  -3 -13   5   84.40    5.70
  -2 -13   5    1.06    1.07
  -1 -13   5    5.30    1.39
   0 -13   5    5.96    1.84
   1 -13   5   13.29    1.86
   2 -13   5    4.91    1.47
   3 -13   5    0.28    0.93
   4 -13   5   44.14    1.70
   5 -13   5   -0.74    1.00
   6 -13   5   -1.56    1.04
   7 -13   5   -1.20    1.00
   8 -13   5   29.91    1.45
   9 -13   5    8.59    1.18
 -12 -14   5    0.69    1.24
 -11 -14   5    0.36    1.20
 -10 -14   5    2.71    1.17
  -9 -14   5    3.26    1.17
  -8 -14   5   15.92    1.17
  -7 -14   5   68.86    2.03
  -6 -14   5   13.88    1.56
  -5 -14   5    1.56    1.64
  -4 -14   5   19.27    4.94
  -3 -14   5  120.16   11.93
  -2 -14   5   10.45    1.49
  -1 -14   5    6.52    2.25
   0 -14   5   -1.15    1.87
   1 -14   5   23.62    2.10
   2 -14   5   10.55    1.62
   3 -14   5   14.23    1.60
   4 -14   5    9.23    1.79
   5 -14   5    0.87    1.62
   6 -14   5   19.37    1.82
   7 -14   5   17.21    1.85
 -10 -15   5    2.32    2.41
  -9 -15   5    5.18    2.21
  -8 -15   5    5.51    2.49
  -7 -15   5    7.43    1.73
  -6 -15   5    6.62    1.79
  -5 -15   5    0.68    1.62
  -4 -15   5    1.04    1.52
  -3 -15   5   88.02    9.80
  -2 -15   5    0.20    2.16
  -1 -15   5    3.70    2.20
   0 -15   5   19.19    2.37
   1 -15   5   21.66    3.56
   2 -15   5    1.19    2.06
   3 -15   5   13.76    1.81
   4 -15   5    4.01    1.67
   5 -15   5    0.24    1.74
   6 -15   5    9.76    2.16
  -7 -16   5   13.57    2.50
  -6 -16   5    0.02    1.77
  -5 -16   5    6.44    1.75
  -4 -16   5    1.03    1.74
  -3 -16   5    4.80    1.87
  -2 -16   5   10.47    2.45
  -1 -16   5    5.75    2.23
   0 -16   5    0.95    2.57
   1 -16   5   -1.13    1.69
   2 -16   5    5.92    1.88
   3 -16   5    6.81    1.81
 -18   0   6    1.29    1.28
 -16   0   6  111.42    2.34
 -14   0   6   13.04    0.82
 -12   0   6    6.54    0.73
 -10   0   6   12.15    0.74
  -8   0   6   84.88    2.72
  -6   0   6   32.92    1.86
  -4   0   6  198.02    9.75
  -2   0   6   57.93    4.08
   0   0   6  143.96   12.05
   2   0   6  412.47   15.05
   4   0   6  142.20    5.71
   6   0   6    0.88    1.95
   8   0   6   46.07    5.16
  10   0   6  106.75    8.20
  12   0   6    5.75    1.80
  14   0   6   91.45    2.62
 -19  -1   6   10.92    3.21
 -18  -1   6   16.61    1.04
 -17  -1   6    0.23    0.88
 -16  -1   6   54.54    1.33
 -15  -1   6   21.32    1.26
 -14  -1   6   15.43    1.05
 -13  -1   6    0.80    0.53
 -12  -1   6    3.00    0.48
 -11  -1   6   14.33    0.70
 -10  -1   6   58.67    2.05
  -9  -1   6   74.17    1.73
  -8  -1   6    2.60    0.42
  -7  -1   6   49.13    2.00
  -6  -1   6   61.52    2.68
  -5  -1   6    1.24    0.46
  -4  -1   6    2.28    0.70
  -3  -1   6   53.27    2.30
  -2  -1   6    0.56    0.85
  -1  -1   6    9.17    1.16
   0  -1   6  159.11    6.34
   1  -1   6   -0.50    1.14
   2  -1   6   32.68    2.76
   3  -1   6   64.01    3.40
   4  -1   6   11.47    1.71
   5  -1   6   10.41    1.63
   6  -1   6   41.18    2.75
   7  -1   6    3.54    1.90
   8  -1   6    5.46    2.78
   9  -1   6   27.30    2.38
  10  -1   6    0.32    1.67
  11  -1   6    6.32    1.73
  12  -1   6    7.27    1.29
  13  -1   6    5.64    1.15
  14  -1   6    8.51    1.22
 -19  -2   6    0.65    0.97
 -18  -2   6    6.54    0.99
 -17  -2   6   51.55    1.51
 -16  -2   6    0.60    0.76
 -15  -2   6    1.18    0.56
 -14  -2   6   15.74    0.66
 -13  -2   6   39.23    1.59
 -12  -2   6   62.10    2.03
 -11  -2   6    0.93    0.51
 -10  -2   6   66.84    2.65
  -9  -2   6   67.42    1.82
  -8  -2   6    7.15    0.45
  -7  -2   6   79.80    2.21
  -6  -2   6   73.42    3.53
  -5  -2   6   43.47    1.98
  -4  -2   6  107.59    3.48
  -3  -2   6  861.78   22.71
  -2  -2   6  441.78   12.59
  -1  -2   6   28.11    1.56
   0  -2   6   44.75    2.33
   1  -2   6  303.07    9.18
   2  -2   6    5.97    1.13
   3  -2   6  187.58    6.90
   4  -2   6  140.93    4.50
   5  -2   6   51.07    4.40
   6  -2   6   31.30    2.52
   7  -2   6   18.75    2.83
   8  -2   6    1.23    1.33
   9  -2   6  149.64    6.22
  10  -2   6  151.52    6.91
  11  -2   6    0.49    1.50
  12  -2   6   -0.54    1.11
  13  -2   6   13.00    1.27
  14  -2   6    1.08    1.20
 -19  -3   6    2.04    1.62
 -18  -3   6    0.39    1.12
 -17  -3   6    9.54    0.96
 -16  -3   6    4.72    0.70
 -15  -3   6    4.87    0.70
 -14  -3   6   37.17    0.84
 -13  -3   6    7.39    0.71
 -12  -3   6    3.00    0.56
 -11  -3   6   94.43    3.42
 -10  -3   6   37.22    1.23
  -9  -3   6    1.30    0.45
  -8  -3   6   68.97    1.29
  -7  -3   6    1.19    0.41
  -6  -3   6   36.30    1.51
  -5  -3   6    4.26    0.50
  -4  -3   6    1.96    0.78
  -3  -3   6  508.23   12.77
  -2  -3   6   66.06    2.63
  -1  -3   6   10.92    0.79
   0  -3   6    9.63    1.13
   1  -3   6   11.49    0.95
   2  -3   6   47.03    1.94
   3  -3   6   31.69    1.87
   4  -3   6   26.06    1.77
   5  -3   6  156.76    6.53
   6  -3   6   44.72    2.62
   7  -3   6   14.71    2.65
   8  -3   6  165.31   10.68
   9  -3   6    3.92    1.67
  10  -3   6   36.96    3.43
  11  -3   6    5.44    2.05
  12  -3   6    0.57    1.38
  13  -3   6   28.09    1.34
  14  -3   6    2.18    1.22
 -19  -4   6   28.93    1.26
 -18  -4   6    4.00    1.56
 -17  -4   6    0.97    0.85
 -16  -4   6    0.64    0.68
 -15  -4   6    2.92    0.69
 -14  -4   6    0.74    0.67
 -13  -4   6   45.09    1.98
 -12  -4   6   42.25    1.92
 -11  -4   6  303.78    9.22
 -10  -4   6  134.10    3.10
  -9  -4   6    9.13    0.46
  -8  -4   6  177.20    5.64
  -7  -4   6    5.88    0.38
  -6  -4   6    1.83    0.34
  -5  -4   6   67.81    1.25
  -4  -4   6   71.63    2.62
  -3  -4   6  755.39   20.45
  -2  -4   6 1027.40   10.44
  -1  -4   6  166.80    5.28
   0  -4   6   70.98    2.84
   1  -4   6  108.25    4.33
   2  -4   6    8.48    0.79
   3  -4   6  171.27    3.89
   4  -4   6   54.74    3.28
   5  -4   6    8.84    1.63
   6  -4   6   42.11    2.06
   7  -4   6   -0.48    2.02
   8  -4   6  155.59    7.90
   9  -4   6  272.25    5.48
  10  -4   6   21.01    1.38
  11  -4   6   21.10    3.03
  12  -4   6   15.38    2.09
  13  -4   6   32.87    1.90
  14  -4   6    9.91    1.48
 -19  -5   6    3.60    1.45
 -18  -5   6    1.67    1.02
 -17  -5   6   15.00    1.46
 -16  -5   6    1.26    1.16
 -15  -5   6   36.76    1.36
 -14  -5   6    4.45    0.82
 -13  -5   6    8.76    0.72
 -12  -5   6    1.46    0.61
 -11  -5   6  155.95    3.14
 -10  -5   6  138.97    4.16
  -9  -5   6    0.43    0.39
  -8  -5   6   38.26    0.90
  -7  -5   6   60.69    1.34
  -6  -5   6   22.47    0.62
  -5  -5   6   34.90    1.13
  -4  -5   6  454.60    7.79
  -3  -5   6   69.83    1.48
  -2  -5   6  106.36    4.26
  -1  -5   6    1.10    0.51
   0  -5   6    8.15    0.65
   1  -5   6    0.97    0.65
   2  -5   6  146.14    4.83
   3  -5   6   15.10    1.08
   4  -5   6    0.97    1.16
   5  -5   6    4.91    1.40
   6  -5   6    2.80    1.16
   7  -5   6   24.38    1.60
   8  -5   6    0.70    1.17
   9  -5   6   42.42    2.00
  10  -5   6    1.70    1.07
  11  -5   6   19.46    2.02
  12  -5   6    2.90    1.34
  13  -5   6    8.15    2.11
  14  -5   6    0.41    1.57
 -17  -6   6   -0.13    0.92
 -16  -6   6    7.59    0.76
 -15  -6   6   16.06    1.16
 -14  -6   6    1.29    1.11
 -13  -6   6    0.37    0.64
 -12  -6   6   27.56    1.46
 -11  -6   6   19.01    0.70
 -10  -6   6  247.08    5.19
  -9  -6   6   62.46    0.83
  -8  -6   6   49.43    1.11
  -7  -6   6   27.65    0.61
  -6  -6   6    7.81    0.41
  -5  -6   6    8.48    0.56
  -4  -6   6   27.73    0.77
  -3  -6   6  284.16    7.25
  -2  -6   6   41.48    1.02
  -1  -6   6   11.68    0.70
   0  -6   6    1.80    0.51
   1  -6   6    7.39    0.71
   2  -6   6  179.68    6.88
   3  -6   6    4.28    0.81
   4  -6   6    6.04    0.95
   5  -6   6  133.53    6.30
   6  -6   6    2.52    1.03
   7  -6   6   12.25    1.27
   8  -6   6    1.24    0.93
   9  -6   6   99.88    2.27
  10  -6   6   36.66    1.62
  11  -6   6   -1.13    1.57
  12  -6   6    0.81    1.34
  13  -6   6    1.45    1.46
 -18  -7   6    9.54    1.49
 -17  -7   6   45.13    3.98
 -16  -7   6   11.11    1.03
 -15  -7   6   30.33    1.56
 -14  -7   6   11.95    0.83
 -13  -7   6    5.79    0.78
 -12  -7   6   26.52    0.99
 -11  -7   6    3.61    0.66
 -10  -7   6    1.12    0.61
  -9  -7   6  100.75    2.52
  -8  -7   6   10.20    0.61
  -7  -7   6    2.91    0.41
  -6  -7   6    2.09    0.36
  -5  -7   6    0.38    0.36
  -4  -7   6  195.10    8.60
  -3  -7   6    7.12    0.45
  -2  -7   6  238.29    7.53
  -1  -7   6   53.09    2.03
   0  -7   6  103.22    3.80
   1  -7   6   41.76    2.20
   2  -7   6  602.86   21.30
   3  -7   6   50.47    2.45
   4  -7   6    0.09    0.88
   5  -7   6   74.55    4.33
   6  -7   6    6.89    1.64
   7  -7   6   13.06    1.19
   8  -7   6    0.47    0.92
   9  -7   6   13.39    1.27
  10  -7   6    2.90    1.01
  11  -7   6    0.53    1.01
  12  -7   6    7.70    1.48
  13  -7   6   30.84    2.23
 -17  -8   6   41.07    1.39
 -16  -8   6    0.69    0.97
 -15  -8   6    6.86    1.00
 -14  -8   6   14.23    1.13
 -13  -8   6    1.23    0.93
 -12  -8   6    0.41    0.73
 -11  -8   6    0.22    0.74
 -10  -8   6   26.30    1.16
  -9  -8   6  359.04   12.08
  -8  -8   6   57.94    2.25
  -7  -8   6  166.00    5.27
  -6  -8   6    6.29    0.55
  -5  -8   6   34.30    1.57
  -4  -8   6   50.75    2.49
  -3  -8   6    6.23    0.53
  -2  -8   6   79.83    4.10
  -1  -8   6  103.82    3.93
   0  -8   6    8.53    1.38
   1  -8   6   36.76    1.15
   2  -8   6  565.43   34.25
   3  -8   6   97.11    6.12
   4  -8   6  165.58    6.33
   5  -8   6   21.03    1.16
   6  -8   6   11.03    1.34
   7  -8   6    7.51    1.06
   8  -8   6   23.46    1.34
   9  -8   6    4.14    0.94
  10  -8   6   76.24    1.99
  11  -8   6   -0.50    1.11
  12  -8   6    1.57    1.20
 -17  -9   6   32.76    1.40
 -16  -9   6   40.08    1.58
 -15  -9   6   -0.77    1.31
 -14  -9   6   13.76    1.13
 -13  -9   6    0.16    0.92
 -12  -9   6    3.13    1.11
 -11  -9   6    1.71    0.89
 -10  -9   6   13.57    1.02
  -9  -9   6    4.37    0.84
  -8  -9   6   10.25    1.23
  -7  -9   6    5.00    1.11
  -6  -9   6   85.06    3.45
  -5  -9   6   29.14    1.37
  -4  -9   6    0.88    0.66
  -3  -9   6   96.18    3.17
  -2  -9   6   85.07    2.95
  -1  -9   6   14.58    0.90
   0  -9   6  151.38    8.74
   1  -9   6    7.30    0.79
   2  -9   6  108.49    3.75
   3  -9   6   56.29    4.52
   4  -9   6   48.12    2.91
   5  -9   6    6.97    1.14
   6  -9   6   23.34    2.18
   7  -9   6    3.75    1.25
   8  -9   6    4.62    0.96
   9  -9   6   10.72    2.55
  10  -9   6    6.73    1.19
  11  -9   6   -0.43    1.18
  12  -9   6   -1.67    1.15
 -16 -10   6    0.88    1.05
 -15 -10   6   19.64    1.24
 -14 -10   6    0.81    1.44
 -13 -10   6   19.40    1.24
 -12 -10   6   23.18    1.31
 -11 -10   6    2.85    1.06
 -10 -10   6    1.49    0.95
  -9 -10   6   12.15    0.99
  -8 -10   6   14.05    1.24
  -7 -10   6    1.54    0.70
  -6 -10   6    3.46    0.68
  -5 -10   6    0.94    0.64
  -4 -10   6    1.37    0.50
  -3 -10   6    4.97    0.53
  -2 -10   6   77.97    3.83
  -1 -10   6   21.57    1.11
   0 -10   6   48.30    3.41
   1 -10   6   33.60    4.49
   2 -10   6   20.46    1.20
   3 -10   6   11.56    1.56
   4 -10   6    2.99    1.03
   5 -10   6    3.07    1.11
   6 -10   6    0.65    0.92
   7 -10   6    0.73    0.96
   8 -10   6    2.72    1.94
   9 -10   6   45.84    1.67
  10 -10   6   13.62    1.29
  11 -10   6   12.10    2.07
 -15 -11   6   19.52    1.26
 -14 -11   6    1.18    1.45
 -13 -11   6   17.84    1.24
 -12 -11   6   10.66    1.06
 -11 -11   6    0.88    1.04
 -10 -11   6    0.47    0.96
  -9 -11   6   16.98    1.10
  -8 -11   6   18.59    1.10
  -7 -11   6    1.34    1.20
  -6 -11   6    5.74    0.88
  -5 -11   6   12.24    1.08
  -4 -11   6   -0.13    0.88
  -3 -11   6    0.25    0.87
  -2 -11   6   11.67    2.20
  -1 -11   6   13.04    3.60
   0 -11   6   20.68    1.59
   1 -11   6    2.21    1.16
   2 -11   6    0.04    1.02
   3 -11   6   -0.81    1.10
   4 -11   6    1.00    1.05
   5 -11   6    6.89    1.04
   6 -11   6    2.50    1.04
   7 -11   6    0.56    1.06
   8 -11   6    4.06    1.05
   9 -11   6   12.46    1.40
  10 -11   6    8.14    1.13
 -14 -12   6  133.03    2.48
 -13 -12   6    1.29    1.16
 -12 -12   6    5.09    1.11
 -11 -12   6   -0.11    1.07
 -10 -12   6    0.89    1.19
  -9 -12   6    1.68    1.24
  -8 -12   6   -0.32    0.95
  -7 -12   6    0.77    1.80
  -6 -12   6    0.54    0.87
  -5 -12   6    9.56    1.03
  -4 -12   6   84.94    7.91
  -3 -12   6    8.05    1.11
  -2 -12   6   16.21    3.38
  -1 -12   6   11.39    2.71
   0 -12   6    3.34    1.10
   1 -12   6    0.28    1.06
   2 -12   6   -0.18    1.37
   3 -12   6    3.09    1.13
   4 -12   6    1.15    1.04
   5 -12   6    4.91    1.04
   6 -12   6   -0.50    1.65
   7 -12   6   36.42    1.41
   8 -12   6   10.55    1.25
   9 -12   6    2.54    1.50
 -13 -13   6    8.98    1.33
 -12 -13   6    0.61    1.11
 -11 -13   6   10.01    1.27
 -10 -13   6   11.25    1.22
  -9 -13   6    6.77    1.17
  -8 -13   6   24.69    1.34
  -7 -13   6   22.00    1.20
  -6 -13   6   15.84    1.08
  -5 -13   6   15.53    1.17
  -4 -13   6  122.12   13.30
  -3 -13   6    3.32    1.17
  -2 -13   6    1.77    1.63
  -1 -13   6   14.14    1.53
   0 -13   6    1.29    1.44
   1 -13   6    1.75    1.59
   2 -13   6    9.67    1.63
   3 -13   6   24.29    1.95
   4 -13   6    1.98    1.08
   5 -13   6   79.62    2.06
   6 -13   6    5.28    1.19
   7 -13   6   53.78    1.54
   8 -13   6   15.15    1.33
 -11 -14   6   24.34    1.60
 -10 -14   6   -0.20    1.28
  -9 -14   6    4.93    1.36
  -8 -14   6   11.68    1.41
  -7 -14   6   14.30    1.27
  -6 -14   6    0.74    1.49
  -5 -14   6   -1.12    1.59
  -4 -14   6    3.32    1.70
  -3 -14   6    3.93    1.42
  -2 -14   6   74.15    5.53
  -1 -14   6   17.08    1.74
   0 -14   6   56.86    2.99
   1 -14   6   13.00    1.98
   2 -14   6   -1.11    1.77
   3 -14   6   24.55    3.46
   4 -14   6    5.56    1.85
   5 -14   6    7.08    1.84
   6 -14   6    7.27    1.83
  -9 -15   6   16.71    2.63
  -8 -15   6   10.48    2.49
  -7 -15   6    6.52    2.38
  -6 -15   6    2.79    1.67
  -5 -15   6   12.73    1.61
  -4 -15   6   -1.22    1.53
  -3 -15   6    2.75    1.50
  -2 -15   6    0.08    1.48
  -1 -15   6    2.38    2.98
   0 -15   6    0.25    2.26
   1 -15   6   10.87    2.07
   2 -15   6    7.80    1.90
   3 -15   6    3.91    2.80
   4 -15   6   -0.57    1.68
  -6 -16   6   13.66    2.66
  -5 -16   6    7.12    2.49
  -4 -16   6    5.02    3.65
  -3 -16   6    0.60    2.25
  -2 -16   6  102.41    8.56
  -1 -16   6   -1.49    2.48
   0 -16   6    7.92    2.14
   1 -16   6   -3.90    2.32
 -18   0   7    0.32    1.37
 -16   0   7   -1.13    1.25
 -14   0   7    0.81    1.20
 -12   0   7   -0.57    0.76
 -10   0   7   -0.25    0.76
  -8   0   7    0.36    0.60
  -6   0   7   -0.62    0.55
  -4   0   7   -0.88    0.79
  -2   0   7   -1.44    1.27
   0   0   7   -1.26    2.11
   2   0   7    0.58    1.15
   4   0   7    0.43    2.51
   6   0   7   -1.28    2.08
   8   0   7    0.76    2.04
  10   0   7   -0.44    2.40
  12   0   7   -0.31    1.69
  14   0   7    1.01    1.81
 -19  -1   7   -1.64    1.02
 -18  -1   7   12.43    1.07
 -17  -1   7   10.05    1.06
 -16  -1   7    7.43    1.76
 -15  -1   7   91.33    4.37
 -14  -1   7   14.34    0.79
 -13  -1   7    4.47    0.56
 -12  -1   7    0.46    0.53
 -11  -1   7    4.48    0.60
 -10  -1   7   17.66    0.79
  -9  -1   7    6.62    0.49
  -8  -1   7    0.14    0.41
  -7  -1   7   76.52    1.74
  -6  -1   7    9.30    0.74
  -5  -1   7  185.48    4.74
  -4  -1   7  446.07   14.78
  -3  -1   7   34.22    1.97
  -2  -1   7   40.85    2.08
  -1  -1   7   15.48    1.08
   0  -1   7    0.32    0.84
   1  -1   7  209.50    6.70
   2  -1   7  317.42    8.43
   3  -1   7   25.35    1.88
   4  -1   7   -0.01    1.68
   5  -1   7   26.14    2.39
   6  -1   7   16.07    1.83
   7  -1   7    0.50    1.42
   8  -1   7   11.78    1.56
   9  -1   7   51.23    3.22
  10  -1   7    8.12    1.72
  11  -1   7    8.96    1.73
  12  -1   7   10.26    1.46
  13  -1   7   20.33    1.45
  14  -1   7   11.86    1.93
 -19  -2   7   -0.34    0.96
 -18  -2   7    0.65    1.13
 -17  -2   7    0.95    0.93
 -16  -2   7   78.82    2.84
 -15  -2   7    3.47    1.48
 -14  -2   7    2.95    0.66
 -13  -2   7   90.14    4.54
 -12  -2   7    4.97    0.70
 -11  -2   7   49.70    1.37
 -10  -2   7   74.46    2.22
  -9  -2   7   63.06    2.48
  -8  -2   7   15.26    0.67
  -7  -2   7    8.75    0.61
  -6  -2   7  135.02    3.53
  -5  -2   7  162.03    4.52
  -4  -2   7   15.79    0.72
  -3  -2   7  296.94    7.50
  -2  -2   7   71.66    3.12
  -1  -2   7   30.32    1.37
   0  -2   7   18.81    1.23
   1  -2   7   39.44    2.07
   2  -2   7   71.44    2.67
   3  -2   7    4.69    1.57
   4  -2   7    4.31    1.51
   5  -2   7    0.30    1.64
   6  -2   7    5.20    1.79
   7  -2   7   -2.92    2.10
   8  -2   7  315.13    8.77
   9  -2   7    0.14    1.45
  10  -2   7    2.97    1.39
  11  -2   7   15.34    1.68
  12  -2   7   -1.28    1.51
  13  -2   7    0.00    1.82
 -19  -3   7   14.55    1.16
 -18  -3   7    7.14    1.05
 -17  -3   7    9.21    0.99
 -16  -3   7   50.38    2.77
 -15  -3   7  127.25    3.11
 -14  -3   7    3.10    0.69
 -13  -3   7   66.01    3.00
 -12  -3   7   25.05    0.92
 -11  -3   7    5.79    0.65
 -10  -3   7   27.70    0.77
  -9  -3   7  167.30    4.83
  -8  -3   7   23.02    0.77
  -7  -3   7   13.68    0.61
  -6  -3   7   91.23    2.25
  -5  -3   7    6.95    0.46
  -4  -3   7  657.60   12.77
  -3  -3   7  203.86    5.10
  -2  -3   7   27.19    1.05
  -1  -3   7   35.85    1.28
   0  -3   7   15.91    1.03
   1  -3   7    1.79    0.74
   2  -3   7    0.14    0.79
   3  -3   7    1.13    0.93
   4  -3   7   82.44    4.06
   5  -3   7   30.46    1.92
   6  -3   7    2.44    1.30
   7  -3   7   -1.99    1.62
   8  -3   7    6.30    1.73
   9  -3   7   16.82    1.82
  10  -3   7    4.98    1.75
  11  -3   7   -1.92    2.20
  12  -3   7    6.29    1.72
  13  -3   7   24.46    1.61
 -19  -4   7   16.20    2.22
 -18  -4   7    5.00    1.00
 -17  -4   7    9.44    1.29
 -16  -4   7   23.67    1.14
 -15  -4   7    9.09    1.30
 -14  -4   7   46.27    3.11
 -13  -4   7    0.73    0.87
 -12  -4   7  121.52    4.98
 -11  -4   7   52.13    1.73
 -10  -4   7  150.07    5.65
  -9  -4   7  488.55   11.26
  -8  -4   7   -0.44    0.44
  -7  -4   7    8.87    0.62
  -6  -4   7   35.67    0.91
  -5  -4   7    3.71    0.50
  -4  -4   7   18.91    0.76
  -3  -4   7   -0.46    0.44
  -2  -4   7  378.78    9.49
  -1  -4   7   38.27    1.13
   0  -4   7    4.38    0.69
   1  -4   7   93.17    3.57
   2  -4   7   34.04    1.69
   3  -4   7   96.23    4.34
   4  -4   7   24.07    1.87
   5  -4   7    1.49    1.47
   6  -4   7    6.55    1.28
   7  -4   7    2.38    1.53
   8  -4   7   94.61    3.48
   9  -4   7   60.86    2.32
  10  -4   7  136.12    4.39
  11  -4   7   -0.77    1.47
  12  -4   7   26.05    3.46
  13  -4   7    3.31    2.46
 -19  -5   7    8.27    1.71
 -18  -5   7    0.51    1.01
 -17  -5   7   13.09    1.62
 -16  -5   7    1.28    1.36
 -15  -5   7    0.24    0.95
 -14  -5   7    1.00    0.89
 -13  -5   7   10.76    0.83
 -12  -5   7  182.14    7.37
 -11  -5   7   37.66    1.50
 -10  -5   7   52.10    1.34
  -9  -5   7    1.20    0.47
  -8  -5   7   -0.34    0.43
  -7  -5   7   60.94    2.30
  -6  -5   7    1.36    0.37
  -5  -5   7    0.89    0.37
  -4  -5   7  186.24    4.27
  -3  -5   7   73.27    2.49
  -2  -5   7   18.26    0.72
  -1  -5   7   14.43    0.72
   0  -5   7  103.90    5.29
   1  -5   7   20.31    1.02
   2  -5   7    1.41    0.85
   3  -5   7   46.69    2.49
   4  -5   7    7.73    1.16
   5  -5   7   48.73    3.24
   6  -5   7   17.56    1.42
   7  -5   7   73.76    2.98
   8  -5   7  141.53    6.49
   9  -5   7   13.36    1.34
  10  -5   7    8.27    1.28
  11  -5   7   -0.90    1.47
  12  -5   7    7.37    1.27
  13  -5   7    2.05    1.52
 -17  -6   7    2.30    1.24
 -16  -6   7    1.04    0.78
 -15  -6   7    1.45    0.80
 -14  -6   7    4.33    0.79
 -13  -6   7   10.64    0.82
 -12  -6   7   96.23    3.13
 -11  -6   7   12.50    0.82
 -10  -6   7  479.06   12.81
  -9  -6   7  192.11    6.80
  -8  -6   7   66.16    1.13
  -7  -6   7    5.84    0.49
  -6  -6   7   14.88    0.58
  -5  -6   7    2.84    0.56
  -4  -6   7   11.13    0.49
  -3  -6   7    0.66    0.44
  -2  -6   7   44.10    1.51
  -1  -6   7   24.78    0.96
   0  -6   7   14.53    0.82
   1  -6   7  157.57    5.08
   2  -6   7   14.64    1.06
   3  -6   7   11.40    1.19
   4  -6   7   61.42    2.61
   5  -6   7    4.77    1.14
   6  -6   7   27.42    1.64
   7  -6   7  150.70    6.99
   8  -6   7    6.55    1.14
   9  -6   7    5.96    1.17
  10  -6   7   32.60    1.51
  11  -6   7    1.99    1.22
  12  -6   7    0.33    1.12
 -18  -7   7   10.21    1.57
 -17  -7   7   12.70    1.52
 -16  -7   7   -0.14    1.00
 -15  -7   7    9.15    1.13
 -14  -7   7   19.95    0.96
 -13  -7   7    0.34    0.80
 -12  -7   7    4.20    0.78
 -11  -7   7  150.68    2.86
 -10  -7   7  104.11    4.13
  -9  -7   7  134.97    3.90
  -8  -7   7  520.27   15.94
  -7  -7   7    6.25    0.60
  -6  -7   7    0.80    0.54
  -5  -7   7    3.95    0.62
  -4  -7   7   77.28    2.33
  -3  -7   7   47.36    1.49
  -2  -7   7  200.32    6.88
  -1  -7   7   36.00    1.11
   0  -7   7  328.47   18.50
   1  -7   7  175.47    6.31
   2  -7   7   31.66    1.52
   3  -7   7  658.84   28.88
   4  -7   7   92.42    4.75
   5  -7   7    0.02    1.06
   6  -7   7    4.00    1.10
   7  -7   7   40.21    1.80
   8  -7   7   31.57    1.54
   9  -7   7   58.75    1.80
  10  -7   7   67.50    1.85
  11  -7   7   24.18    2.25
  12  -7   7   12.84    1.19
 -17  -8   7    0.13    1.47
 -16  -8   7   37.52    1.44
 -15  -8   7   11.93    1.13
 -14  -8   7   66.19    1.88
 -13  -8   7    8.13    1.15
 -12  -8   7    1.11    0.79
 -11  -8   7    2.34    0.88
 -10  -8   7    2.67    0.79
  -9  -8   7   -0.10    0.61
  -8  -8   7   22.49    0.89
  -7  -8   7   77.80    1.63
  -6  -8   7   12.44    0.80
  -5  -8   7    4.48    0.64
  -4  -8   7   71.76    4.90
  -3  -8   7    1.87    0.58
  -2  -8   7  428.47   18.30
  -1  -8   7   13.47    0.78
   0  -8   7  178.50    4.67
   1  -8   7   21.28    1.00
   2  -8   7   -0.05    0.80
   3  -8   7  242.30   10.82
   4  -8   7   54.30    3.26
   5  -8   7   32.52    1.68
   6  -8   7    0.08    1.34
   7  -8   7    1.01    1.05
   8  -8   7  127.87    4.35
   9  -8   7   13.75    1.24
  10  -8   7    3.35    1.36
  11  -8   7    8.77    1.30
 -16  -9   7   14.71    1.77
 -15  -9   7   -2.30    1.01
 -14  -9   7   68.53    2.42
 -13  -9   7   51.10    2.51
 -12  -9   7    1.40    1.01
 -11  -9   7   12.30    1.15
 -10  -9   7    1.64    0.99
  -9  -9   7    2.29    0.99
  -8  -9   7    0.44    0.87
  -7  -9   7   55.41    2.89
  -6  -9   7   28.50    1.06
  -5  -9   7    5.37    0.69
  -4  -9   7   51.64    2.57
  -3  -9   7  177.58    5.78
  -2  -9   7  483.39   22.28
  -1  -9   7   76.49    5.79
   0  -9   7  105.64    4.40
   1  -9   7  299.83   14.01
   2  -9   7   17.01    1.20
   3  -9   7    1.95    0.91
   4  -9   7   12.43    1.15
   5  -9   7   40.40    1.69
   6  -9   7    4.98    1.69
   7  -9   7    0.33    1.04
   8  -9   7    5.28    1.10
   9  -9   7   75.76    3.99
  10  -9   7   31.63    1.52
  11  -9   7    5.05    1.40
 -16 -10   7   29.68    1.49
 -15 -10   7   49.95    1.68
 -14 -10   7   97.08    2.26
 -13 -10   7   19.44    1.41
 -12 -10   7   21.70    1.24
 -11 -10   7    5.42    1.58
 -10 -10   7    3.07    1.00
  -9 -10   7   -1.22    0.89
  -8 -10   7    0.78    0.93
  -7 -10   7   23.76    1.34
  -6 -10   7    1.84    0.82
  -5 -10   7    4.36    0.94
  -4 -10   7  175.28   12.20
  -3 -10   7   51.51    3.74
  -2 -10   7    3.46    1.22
  -1 -10   7   83.08    5.55
   0 -10   7    9.39    1.02
   1 -10   7   43.02    1.63
   2 -10   7    6.58    1.08
   3 -10   7    4.27    1.08
   4 -10   7    5.06    1.18
   5 -10   7    1.02    1.07
   6 -10   7    4.45    2.37
   7 -10   7   22.72    2.69
   8 -10   7    0.13    1.13
   9 -10   7    1.64    1.25
  10 -10   7    1.75    1.28
 -15 -11   7   51.40    2.55
 -14 -11   7  146.21    4.00
 -13 -11   7    6.23    1.20
 -12 -11   7   23.08    2.41
 -11 -11   7    1.96    1.40
 -10 -11   7   15.95    1.62
  -9 -11   7    2.76    1.06
  -8 -11   7    8.80    1.03
  -7 -11   7   19.38    1.13
  -6 -11   7   20.40    1.27
  -5 -11   7   41.29    5.60
  -4 -11   7   31.18    3.21
  -3 -11   7  216.95   22.80
  -2 -11   7   14.81    2.18
  -1 -11   7   26.40    3.97
   0 -11   7   10.60    1.24
   1 -11   7    4.51    1.07
   2 -11   7    5.54    1.11
   3 -11   7    0.93    1.04
   4 -11   7   12.74    1.23
   5 -11   7   20.05    1.40
   6 -11   7   -0.92    1.05
   7 -11   7    1.77    1.11
   8 -11   7   16.37    1.28
   9 -11   7   -0.90    1.15
 -14 -12   7   15.14    1.92
 -13 -12   7   76.31    2.03
 -12 -12   7    9.43    1.22
 -11 -12   7   -0.39    1.20
 -10 -12   7    1.51    1.16
  -9 -12   7    2.59    1.05
  -8 -12   7   43.93    2.20
  -7 -12   7   60.83    3.83
  -6 -12   7   10.93    1.04
  -5 -12   7   25.34    3.17
  -4 -12   7   28.95    5.85
  -3 -12   7   16.42    2.84
  -2 -12   7    1.20    1.14
  -1 -12   7    4.48    1.24
   0 -12   7   -0.74    1.06
   1 -12   7    0.08    1.11
   2 -12   7   40.17    2.92
   3 -12   7    4.63    1.28
   4 -12   7   39.97    1.69
   5 -12   7   31.17    1.54
   6 -12   7    0.64    1.06
   7 -12   7   18.76    1.48
   8 -12   7    9.69    1.19
 -12 -13   7    3.24    1.53
 -11 -13   7    1.23    1.16
 -10 -13   7    4.67    1.19
  -9 -13   7    7.05    1.52
  -8 -13   7   83.70    3.56
  -7 -13   7   40.04    2.32
  -6 -13   7    0.05    1.22
  -5 -13   7    0.62    1.34
  -4 -13   7   13.75    1.59
  -3 -13   7   74.29    6.66
  -2 -13   7   -1.24    1.34
  -1 -13   7    0.78    1.48
   0 -13   7    8.06    1.40
   1 -13   7   17.03    1.67
   2 -13   7    1.01    1.60
   3 -13   7    0.97    1.54
   4 -13   7  112.95    3.41
   5 -13   7    2.60    1.11
   6 -13   7   15.82    1.28
   7 -13   7    1.87    1.15
 -11 -14   7    1.95    1.42
 -10 -14   7    0.69    1.34
  -9 -14   7    0.26    1.29
  -8 -14   7   10.36    1.65
  -7 -14   7  118.69    4.06
  -6 -14   7    1.75    2.15
  -5 -14   7    7.51    1.62
  -4 -14   7    0.60    1.53
  -3 -14   7    0.39    1.46
  -2 -14   7   -0.69    1.46
  -1 -14   7   -1.86    2.03
   0 -14   7   13.29    1.72
   1 -14   7    4.33    1.62
   2 -14   7   12.74    2.07
   3 -14   7    4.24    1.98
   4 -14   7   82.57    4.20
   5 -14   7   32.03    2.18
  -9 -15   7   61.30    3.26
  -8 -15   7   11.78    2.40
  -7 -15   7    9.42    2.57
  -6 -15   7    2.57    2.46
  -5 -15   7    7.09    2.53
  -4 -15   7   16.92    5.18
  -3 -15   7   21.73    1.92
  -2 -15   7   17.56    1.85
  -1 -15   7   41.22    3.06
   0 -15   7   13.82    3.05
   1 -15   7   12.59    2.37
   2 -15   7   14.87    2.23
   3 -15   7    3.44    2.03
  -4 -16   7   -3.76    2.62
  -3 -16   7   -0.14    2.03
  -2 -16   7   17.94    2.61
 -18   0   8   18.25    1.54
 -16   0   8    1.29    1.33
 -14   0   8  165.88    5.41
 -12   0   8   47.78    2.96
 -10   0   8   39.91    1.87
  -8   0   8    6.86    0.95
  -6   0   8  178.56    6.30
  -4   0   8  231.98    9.48
  -2   0   8  103.82    4.89
   0   0   8    5.17    2.22
   2   0   8   33.08    2.71
   4   0   8   63.37    4.81
   6   0   8   15.61    2.44
   8   0   8  139.41    8.50
  10   0   8    7.41    1.85
  12   0   8  103.30    4.13
 -19  -1   8    3.75    1.52
 -18  -1   8   14.46    1.12
 -17  -1   8   11.50    1.04
 -16  -1   8    0.83    0.85
 -15  -1   8   26.30    1.15
 -14  -1   8    8.77    1.11
 -13  -1   8   12.95    1.02
 -12  -1   8   88.36    3.97
 -11  -1   8    4.98    0.83
 -10  -1   8   52.57    1.27
  -9  -1   8   22.92    0.96
  -8  -1   8   15.64    0.72
  -7  -1   8  123.91    4.75
  -6  -1   8    1.08    0.44
  -5  -1   8    0.53    0.53
  -4  -1   8  113.06    4.79
  -3  -1   8   12.28    0.99
  -2  -1   8    3.13    0.68
  -1  -1   8    9.15    0.91
   0  -1   8    1.02    1.41
   1  -1   8    6.38    1.45
   2  -1   8   69.93    5.06
   3  -1   8   -1.56    1.97
   4  -1   8   -2.38    1.87
   5  -1   8   -0.83    1.42
   6  -1   8   21.08    2.19
   7  -1   8    1.08    2.05
   8  -1   8    6.11    2.08
   9  -1   8    8.40    1.47
  10  -1   8    0.62    1.70
  11  -1   8    3.30    1.52
  12  -1   8    1.23    2.11
  13  -1   8    0.53    1.59
 -19  -2   8    2.69    1.03
 -18  -2   8    6.59    1.06
 -17  -2   8    2.98    1.00
 -16  -2   8    3.81    0.87
 -15  -2   8   51.64    1.88
 -14  -2   8   14.64    1.05
 -13  -2   8   -0.51    0.91
 -12  -2   8  160.47    6.24
 -11  -2   8   12.98    0.91
 -10  -2   8   49.96    1.47
  -9  -2   8    1.65    0.58
  -8  -2   8   37.81    1.08
  -7  -2   8   49.40    2.28
  -6  -2   8    3.34    0.54
  -5  -2   8  142.65    4.16
  -4  -2   8   16.26    0.79
  -3  -2   8   66.48    1.91
  -2  -2   8  146.41    5.53
  -1  -2   8  128.65    3.90
   0  -2   8   14.89    1.53
   1  -2   8   28.66    1.69
   2  -2   8  132.59    5.23
   3  -2   8    0.41    1.23
   4  -2   8    2.82    1.73
   5  -2   8    5.13    1.75
   6  -2   8   11.31    2.09
   7  -2   8   25.73    2.43
   8  -2   8   93.38    4.54
   9  -2   8  291.11    7.41
  10  -2   8    1.97    1.58
  11  -2   8   24.97    1.63
  12  -2   8   15.74    2.03
 -19  -3   8    0.23    1.08
 -18  -3   8    2.05    1.06
 -17  -3   8   47.50    1.38
 -16  -3   8    7.94    1.06
 -15  -3   8    8.17    2.74
 -14  -3   8    0.91    0.88
 -13  -3   8    1.93    0.73
 -12  -3   8   57.35    2.67
 -11  -3   8   85.38    3.56
 -10  -3   8   38.89    1.22
  -9  -3   8    2.99    0.74
  -8  -3   8   -0.30    0.47
  -7  -3   8   39.62    1.52
  -6  -3   8   30.64    0.97
  -5  -3   8   13.23    0.58
  -4  -3   8   61.78    1.56
  -3  -3   8   12.62    0.73
  -2  -3   8   33.01    1.26
  -1  -3   8   31.40    1.23
   0  -3   8    4.09    1.14
   1  -3   8   15.28    1.48
   2  -3   8    7.44    1.51
   3  -3   8   41.88    2.65
   4  -3   8    5.27    1.37
   5  -3   8   21.43    1.96
   6  -3   8   14.31    1.93
   7  -3   8  107.51    3.95
   8  -3   8   -0.44    2.39
   9  -3   8   15.66    1.94
  10  -3   8    0.42    1.81
  11  -3   8    7.87    2.31
  12  -3   8   70.71    1.96
 -19  -4   8   17.57    1.17
 -18  -4   8   28.17    2.87
 -17  -4   8    0.84    1.00
 -16  -4   8    4.48    1.99
 -15  -4   8   23.14    1.17
 -14  -4   8    0.08    1.15
 -13  -4   8    4.00    1.00
 -12  -4   8   47.51    3.49
 -11  -4   8    0.48    0.82
 -10  -4   8  354.12   10.74
  -9  -4   8   11.46    0.96
  -8  -4   8   30.05    0.95
  -7  -4   8    0.14    0.49
  -6  -4   8    0.66    0.51
  -5  -4   8    8.69    0.56
  -4  -4   8   27.58    0.77
  -3  -4   8   21.70    0.76
  -2  -4   8    2.97    0.61
  -1  -4   8   12.33    0.95
   0  -4   8   14.94    1.08
   1  -4   8  340.62   10.59
   2  -4   8   27.29    1.91
   3  -4   8    7.01    2.98
   4  -4   8    9.89    1.70
   5  -4   8    8.51    1.88
   6  -4   8    1.04    1.49
   7  -4   8   -0.50    1.19
   8  -4   8   76.98    2.28
   9  -4   8  119.01    4.45
  10  -4   8   14.89    1.91
  11  -4   8    1.61    1.65
  12  -4   8   -1.19    1.69
 -18  -5   8   35.03    2.15
 -17  -5   8   -0.34    1.46
 -16  -5   8   25.99    1.61
 -15  -5   8   30.97    1.70
 -14  -5   8   24.45    1.26
 -13  -5   8    0.09    1.08
 -12  -5   8   18.63    0.91
 -11  -5   8    6.17    0.76
 -10  -5   8  107.13    3.98
  -9  -5   8  652.41   15.31
  -8  -5   8   17.84    1.06
  -7  -5   8   -0.05    0.53
  -6  -5   8   80.47    2.87
  -5  -5   8   18.60    0.77
  -4  -5   8   16.79    0.76
  -3  -5   8   10.18    0.67
  -2  -5   8    0.50    0.66
  -1  -5   8    7.07    0.89
   0  -5   8   13.02    1.15
   1  -5   8  119.78    5.52
   2  -5   8  657.02   20.28
   3  -5   8   12.84    1.30
   4  -5   8   75.77    4.17
   5  -5   8    1.13    1.22
   6  -5   8    0.99    1.18
   7  -5   8   80.55    3.80
   8  -5   8    7.55    1.34
   9  -5   8   14.53    1.53
  10  -5   8   -0.12    1.26
  11  -5   8    1.68    1.33
  12  -5   8   23.21    1.54
 -16  -6   8   -1.30    0.97
 -15  -6   8   10.44    0.90
 -14  -6   8   -0.15    0.81
 -13  -6   8    2.20    0.82
 -12  -6   8    3.37    0.84
 -11  -6   8   23.48    1.06
 -10  -6   8    3.99    0.62
  -9  -6   8  152.54    4.77
  -8  -6   8    6.16    0.61
  -7  -6   8  124.52    3.85
  -6  -6   8   11.09    0.65
  -5  -6   8   15.72    0.72
  -4  -6   8   37.53    1.04
  -3  -6   8   14.09    0.89
  -2  -6   8    2.77    0.73
  -1  -6   8   65.90    2.08
   0  -6   8   19.42    1.35
   1  -6   8    9.57    1.15
   2  -6   8  391.76   12.26
   3  -6   8    6.42    1.33
   4  -6   8  237.49   11.02
   5  -6   8    7.23    1.08
   6  -6   8   35.85    1.82
   7  -6   8    1.14    2.17
   8  -6   8   40.17    1.99
   9  -6   8    0.87    1.59
  10  -6   8   -0.81    1.22
  11  -6   8   -0.55    1.29
 -17  -7   8   15.97    1.69
 -16  -7   8    1.23    1.36
 -15  -7   8    0.20    1.00
 -14  -7   8   17.56    0.93
 -13  -7   8   10.70    1.36
 -12  -7   8   31.43    1.13
 -11  -7   8   10.64    0.94
 -10  -7   8   -0.21    0.66
  -9  -7   8    2.65    0.67
  -8  -7   8    8.20    0.68
  -7  -7   8   -0.35    0.57
  -6  -7   8    6.25    0.67
  -5  -7   8   24.19    1.04
  -4  -7   8  273.68   12.08
  -3  -7   8  113.05    6.65
  -2  -7   8   87.16    4.13
  -1  -7   8  121.48    8.45
   0  -7   8   99.34    3.97
   1  -7   8   28.67    1.60
   2  -7   8    8.45    1.16
   3  -7   8    2.79    1.07
   4  -7   8    2.26    1.11
   5  -7   8    0.99    1.19
   6  -7   8    3.85    1.10
   7  -7   8   23.54    1.34
   8  -7   8   25.96    2.30
   9  -7   8    1.88    1.24
  10  -7   8    3.12    1.26
  11  -7   8   15.86    1.34
 -17  -8   8    7.25    1.67
 -16  -8   8   64.52    2.44
 -15  -8   8    1.50    1.03
 -14  -8   8    4.38    1.62
 -13  -8   8    0.41    1.06
 -12  -8   8   -0.09    1.03
 -11  -8   8   11.21    0.99
 -10  -8   8   44.76    1.70
  -9  -8   8   60.03    3.66
  -8  -8   8    1.86    0.67
  -7  -8   8    4.94    0.70
  -6  -8   8    0.49    0.72
  -5  -8   8  169.20   10.53
  -4  -8   8   46.06    1.91
  -3  -8   8   32.60    3.56
  -2  -8   8   12.97    0.97
  -1  -8   8   36.74    2.99
   0  -8   8  126.34    5.40
   1  -8   8   26.93    1.37
   2  -8   8   29.88    2.02
   3  -8   8   59.49    2.33
   4  -8   8   22.30    1.34
   5  -8   8    1.74    1.08
   6  -8   8    0.23    1.03
   7  -8   8   -0.03    1.04
   8  -8   8    3.79    1.18
   9  -8   8   18.67    1.34
  10  -8   8    6.90    1.38
 -16  -9   8   62.25    2.44
 -15  -9   8    3.26    1.37
 -14  -9   8   25.48    1.41
 -13  -9   8    4.75    2.26
 -12  -9   8    2.77    1.00
 -11  -9   8    1.80    1.01
 -10  -9   8   11.70    1.14
  -9  -9   8   48.47    2.17
  -8  -9   8   16.20    1.06
  -7  -9   8    4.64    0.92
  -6  -9   8    0.36    0.90
  -5  -9   8   81.26    3.78
  -4  -9   8  279.79   13.92
  -3  -9   8   37.90    2.50
  -2  -9   8   10.21    1.29
  -1  -9   8   28.58    1.40
   0  -9   8    2.85    1.01
   1  -9   8   12.25    1.19
   2  -9   8   32.62    1.46
   3  -9   8    7.60    1.06
   4  -9   8    0.45    0.99
   5  -9   8    1.98    1.12
   6  -9   8   45.15    1.76
   7  -9   8   99.07    2.49
   8  -9   8   72.24    2.16
   9  -9   8    2.37    1.29
  10  -9   8    4.71    1.34
 -15 -10   8    6.42    2.05
 -14 -10   8    7.48    1.16
 -13 -10   8    3.31    1.10
 -12 -10   8   11.10    1.13
 -11 -10   8    8.01    1.58
 -10 -10   8   10.77    1.27
  -9 -10   8    0.21    1.03
  -8 -10   8    6.72    1.24
  -7 -10   8    7.81    1.01
  -6 -10   8    7.21    1.30
  -5 -10   8   18.68    1.06
  -4 -10   8    5.95    0.95
  -3 -10   8    2.03    0.94
  -2 -10   8   15.74    1.94
  -1 -10   8    1.12    1.02
   0 -10   8    0.51    1.03
   1 -10   8   -2.07    1.07
   2 -10   8   36.68    1.71
   3 -10   8   10.09    1.03
   4 -10   8    1.23    1.07
   5 -10   8   -0.30    1.74
   6 -10   8    1.13    1.72
   7 -10   8   15.18    1.45
   8 -10   8    1.60    1.23
   9 -10   8   -1.70    1.34
 -14 -11   8   21.50    1.45
 -13 -11   8   20.69    1.41
 -12 -11   8    4.24    1.72
 -11 -11   8    3.05    1.13
 -10 -11   8   -0.44    1.33
  -9 -11   8    1.54    1.12
  -8 -11   8   29.23    1.39
  -7 -11   8   17.25    1.39
  -6 -11   8   -1.02    1.52
  -5 -11   8    0.65    1.03
  -4 -11   8    1.57    1.14
  -3 -11   8   38.99    3.92
  -2 -11   8   22.31    3.24
  -1 -11   8    6.42    1.20
   0 -11   8   -0.59    1.26
   1 -11   8   22.74    1.40
   2 -11   8    1.11    1.00
   3 -11   8   45.21    2.23
   4 -11   8   84.17    2.80
   5 -11   8   -0.27    1.19
   6 -11   8    3.28    1.22
   7 -11   8    9.83    1.29
   8 -11   8   62.89    3.67
 -13 -12   8    7.50    1.34
 -12 -12   8    0.84    1.27
 -11 -12   8   -0.56    1.13
 -10 -12   8    1.54    1.23
  -9 -12   8    3.60    1.13
  -8 -12   8    2.49    1.70
  -7 -12   8   21.36    2.19
  -6 -12   8   18.84    2.18
  -5 -12   8   22.23    2.48
  -4 -12   8   48.42    7.60
  -3 -12   8   45.18    8.20
  -2 -12   8   39.48    4.98
  -1 -12   8    4.74    1.35
   0 -12   8    8.65    1.18
   1 -12   8   11.16    1.33
   2 -12   8   10.07    1.87
   3 -12   8    3.53    1.57
   4 -12   8    0.62    1.33
   5 -12   8    0.97    1.25
   6 -12   8    3.37    1.49
   7 -12   8   10.28    1.44
 -12 -13   8   -0.47    1.77
 -11 -13   8   -1.17    1.24
 -10 -13   8    2.42    2.08
  -9 -13   8    1.74    1.76
  -8 -13   8    2.82    2.22
  -7 -13   8   19.36    1.79
  -6 -13   8   -1.10    2.37
  -5 -13   8    2.80    1.36
  -4 -13   8    3.18    1.24
  -3 -13   8    1.83    1.37
  -2 -13   8   15.80    2.94
  -1 -13   8    4.21    1.47
   0 -13   8    1.52    1.44
   1 -13   8    5.21    1.52
   2 -13   8   -1.81    1.44
   3 -13   8   -0.08    1.69
   4 -13   8    1.96    1.52
   5 -13   8   10.67    1.67
 -10 -14   8    0.94    1.34
  -9 -14   8    0.61    1.42
  -8 -14   8   31.43    2.87
  -7 -14   8   10.75    2.40
  -6 -14   8   14.04    2.28
  -5 -14   8    6.95    2.37
  -4 -14   8   15.19    2.77
  -3 -14   8   41.77    5.67
  -2 -14   8    1.29    1.57
  -1 -14   8   15.64    1.88
   0 -14   8    8.54    1.88
   1 -14   8    5.56    1.75
   2 -14   8   13.73    1.79
   3 -14   8   40.32    2.32
  -7 -15   8   33.04    3.03
  -6 -15   8   -0.74    2.48
  -5 -15   8   -0.21    2.73
  -4 -15   8   11.73    3.26
  -3 -15   8   -1.61    3.02
  -2 -15   8    4.78    1.73
  -1 -15   8    5.39    1.80
   0 -15   8    4.56    1.76
 -18   0   9    1.52    1.38
 -16   0   9   -0.96    1.37
 -14   0   9   -0.19    1.35
 -12   0   9   -2.25    1.29
 -10   0   9    1.58    1.27
  -8   0   9   -0.11    0.85
  -6   0   9   -0.19    0.93
  -4   0   9   -0.64    1.31
  -2   0   9    0.11    1.86
   0   0   9   -2.78    2.27
   2   0   9   -2.45    1.98
   4   0   9   -0.46    2.16
   6   0   9   -1.99    1.90
   8   0   9    0.34    2.39
  10   0   9    1.94    2.17
 -19  -1   9    1.16    1.96
 -18  -1   9   18.11    1.18
 -17  -1   9    9.92    1.30
 -16  -1   9   24.02    1.31
 -15  -1   9   -0.65    0.79
 -14  -1   9   13.59    0.97
 -13  -1   9   12.13    1.14
 -12  -1   9   15.34    1.46
 -11  -1   9  189.22    7.55
 -10  -1   9   38.22    1.39
  -9  -1   9    0.25    0.67
  -8  -1   9    5.53    0.70
  -7  -1   9    4.15    0.72
  -6  -1   9  132.59    3.36
  -5  -1   9    4.89    0.73
  -4  -1   9  444.10   16.38
  -3  -1   9    0.34    1.16
  -2  -1   9  174.89    7.73
  -1  -1   9    7.70    1.58
   0  -1   9   20.62    2.00
   1  -1   9   67.69    4.08
   2  -1   9    0.97    2.03
   3  -1   9   10.30    1.94
   4  -1   9   23.20    2.45
   5  -1   9    3.11    2.11
   6  -1   9    3.89    1.52
   7  -1   9  167.30    3.95
   8  -1   9    0.31    1.53
   9  -1   9   96.63    2.73
  10  -1   9   -1.41    1.49
  11  -1   9    0.26    2.09
 -19  -2   9   15.74    1.24
 -18  -2   9    2.72    1.14
 -17  -2   9    8.81    1.08
 -16  -2   9   10.37    1.07
 -15  -2   9    3.15    0.94
 -14  -2   9   12.74    1.12
 -13  -2   9  107.58    3.56
 -12  -2   9   25.27    1.05
 -11  -2   9  123.02    5.01
 -10  -2   9    6.25    0.76
  -9  -2   9    3.25    0.74
  -8  -2   9   31.38    1.94
  -7  -2   9   79.09    2.92
  -6  -2   9    0.35    0.59
  -5  -2   9  117.00    4.38
  -4  -2   9  247.88   10.05
  -3  -2   9    0.26    0.97
  -2  -2   9   11.78    1.14
  -1  -2   9   13.86    1.46
   0  -2   9   49.81    2.88
   1  -2   9   81.10    4.50
   2  -2   9   77.51    4.40
   3  -2   9   11.32    1.60
   4  -2   9    3.80    2.80
   5  -2   9   -1.00    1.60
   6  -2   9   27.50    3.11
   7  -2   9  139.94    4.04
   8  -2   9    1.00    1.47
   9  -2   9    0.78    1.54
  10  -2   9   -0.05    1.53
  11  -2   9   14.94    1.59
 -19  -3   9    1.38    1.13
 -18  -3   9    5.54    1.12
 -17  -3   9    8.64    1.16
 -16  -3   9  138.22    2.14
 -15  -3   9   14.59    1.11
 -14  -3   9   32.61    1.24
 -13  -3   9   43.87    1.40
 -12  -3   9   50.83    2.44
 -11  -3   9  307.58   16.62
 -10  -3   9   89.54    3.99
  -9  -3   9   28.86    1.72
  -8  -3   9    6.47    1.13
  -7  -3   9   41.56    1.50
  -6  -3   9   -0.27    0.57
  -5  -3   9   78.58    2.31
  -4  -3   9  334.46    9.72
  -3  -3   9   -1.07    0.80
  -2  -3   9    5.40    1.25
  -1  -3   9    0.28    1.14
   0  -3   9   16.08    2.02
   1  -3   9   86.35    5.42
   2  -3   9   -1.03    1.52
   3  -3   9   65.58    4.09
   4  -3   9   43.96    3.10
   5  -3   9    4.13    1.35
   6  -3   9   29.41    2.04
   7  -3   9   11.73    2.14
   8  -3   9    9.75    2.02
   9  -3   9   21.15    2.88
  10  -3   9   17.70    2.26
  11  -3   9    3.61    1.71
 -18  -4   9    0.72    1.11
 -17  -4   9   -0.51    1.11
 -16  -4   9   17.01    1.16
 -15  -4   9    0.10    0.95
 -14  -4   9   31.43    1.97
 -13  -4   9   11.74    1.16
 -12  -4   9   13.16    1.23
 -11  -4   9  182.97   10.45
 -10  -4   9   49.00    2.51
  -9  -4   9  152.67    5.53
  -8  -4   9   25.34    1.08
  -7  -4   9   18.22    0.94
  -6  -4   9   85.75    3.22
  -5  -4   9    0.76    1.02
  -4  -4   9   54.76    1.60
  -3  -4   9   70.96    2.46
  -2  -4   9    8.85    0.96
  -1  -4   9  249.77   10.81
   0  -4   9   41.65    2.25
   1  -4   9  646.24   18.06
   2  -4   9   20.81    1.92
   3  -4   9  162.45    7.96
   4  -4   9    2.14    1.31
   5  -4   9    4.83    1.34
   6  -4   9   -0.14    1.28
   7  -4   9   19.42    1.73
   8  -4   9    3.12    1.39
   9  -4   9   -3.08    1.40
  10  -4   9    2.29    1.39
  11  -4   9    8.59    2.27
 -18  -5   9    0.56    1.15
 -17  -5   9   63.89    2.50
 -16  -5   9   46.63    2.13
 -15  -5   9   10.97    1.58
 -14  -5   9   18.48    1.71
 -13  -5   9    4.23    0.80
 -12  -5   9   53.97    2.25
 -11  -5   9    8.20    0.92
 -10  -5   9    1.71    0.68
  -9  -5   9   91.40    3.82
  -8  -5   9    7.51    0.77
  -7  -5   9   88.49    4.85
  -6  -5   9   76.09    2.78
  -5  -5   9    0.35    0.61
  -4  -5   9   -0.93    1.12
  -3  -5   9    0.30    0.71
  -2  -5   9   -0.13    0.85
  -1  -5   9  153.40    6.51
   0  -5   9  139.98    4.75
   1  -5   9    0.78    1.50
   2  -5   9  154.95    7.05
   3  -5   9   49.00    2.85
   4  -5   9    2.16    1.19
   5  -5   9    6.22    1.35
   6  -5   9    9.25    1.37
   7  -5   9   38.35    2.03
   8  -5   9    7.38    1.36
   9  -5   9    5.16    1.36
  10  -5   9   -0.34    1.48
  11  -5   9   -0.72    1.46
 -16  -6   9   28.08    1.30
 -15  -6   9   22.10    1.28
 -14  -6   9   -0.85    0.96
 -13  -6   9    4.01    0.84
 -12  -6   9   13.02    1.03
 -11  -6   9   11.07    0.92
 -10  -6   9    2.99    0.89
  -9  -6   9    0.15    0.65
  -8  -6   9   74.94    3.14
  -7  -6   9   -0.12    0.62
  -6  -6   9    1.11    0.76
  -5  -6   9   60.56    2.49
  -4  -6   9    0.02    0.87
  -3  -6   9   20.68    2.33
  -2  -6   9    8.07    1.00
  -1  -6   9   72.12    3.03
   0  -6   9  140.59    6.35
   1  -6   9   79.73    4.43
   2  -6   9   56.79    3.53
   3  -6   9   -1.52    1.13
   4  -6   9    2.08    1.12
   5  -6   9    0.22    1.14
   6  -6   9   -0.87    1.12
   7  -6   9   20.34    2.13
   8  -6   9    2.39    1.25
   9  -6   9   23.37    2.59
  10  -6   9   -0.16    1.29
 -17  -7   9    7.54    1.63
 -16  -7   9   35.58    2.17
 -15  -7   9    3.45    1.60
 -14  -7   9   18.78    1.31
 -13  -7   9   -0.27    0.99
 -12  -7   9    9.29    1.00
 -11  -7   9   -0.90    1.10
 -10  -7   9   19.29    1.13
  -9  -7   9   17.77    1.30
  -8  -7   9   28.47    1.33
  -7  -7   9    1.36    0.72
  -6  -7   9   63.35    2.48
  -5  -7   9   94.53    3.25
  -4  -7   9    3.35    0.89
  -3  -7   9  147.86   10.93
  -2  -7   9   29.99    2.06
  -1  -7   9   81.87    4.70
   0  -7   9   64.34    3.85
   1  -7   9    4.69    1.23
   2  -7   9    1.52    1.20
   3  -7   9   74.39    3.60
   4  -7   9   67.61    2.29
   5  -7   9   -0.62    1.15
   6  -7   9   53.27    2.61
   7  -7   9   79.05    2.32
   8  -7   9   12.29    1.46
   9  -7   9    9.74    1.38
  10  -7   9   -3.03    1.61
 -17  -8   9   25.48    1.85
 -16  -8   9   15.54    1.63
 -15  -8   9   30.62    1.86
 -14  -8   9    0.44    1.05
 -13  -8   9   17.71    1.34
 -12  -8   9   39.67    2.28
 -11  -8   9    8.02    1.13
 -10  -8   9   73.71    3.51
  -9  -8   9   26.38    1.36
  -8  -8   9  130.42    6.59
  -7  -8   9   15.45    0.85
  -6  -8   9  144.30    5.72
  -5  -8   9   52.14    2.40
  -4  -8   9  108.80    8.73
  -3  -8   9   52.50    3.59
  -2  -8   9   28.71    2.46
  -1  -8   9    6.43    1.10
   0  -8   9    3.34    1.90
   1  -8   9    0.10    0.97
   2  -8   9   42.50    1.87
   3  -8   9    1.14    0.96
   4  -8   9    0.00    1.38
   5  -8   9   40.10    1.67
   6  -8   9    6.88    1.28
   7  -8   9    3.75    2.00
   8  -8   9   40.04    1.73
   9  -8   9    8.59    1.77
 -16  -9   9    6.24    1.72
 -15  -9   9   13.44    1.62
 -14  -9   9   11.22    1.31
 -13  -9   9   10.77    1.92
 -12  -9   9   -0.25    1.08
 -11  -9   9   24.88    1.33
 -10  -9   9   11.90    1.94
  -9  -9   9    8.03    1.11
  -8  -9   9   16.64    1.25
  -7  -9   9   18.10    1.57
  -6  -9   9   16.07    1.28
  -5  -9   9    0.31    1.04
  -4  -9   9  194.81    8.51
  -3  -9   9    8.46    1.08
  -2  -9   9   13.64    1.49
  -1  -9   9   -0.71    1.04
   0  -9   9   49.28    2.57
   1  -9   9   26.81    1.35
   2  -9   9    4.26    2.67
   3  -9   9    1.46    1.20
   4  -9   9   -0.19    1.05
   5  -9   9    1.49    1.31
   6  -9   9   23.71    1.41
   7  -9   9   28.78    1.54
   8  -9   9    0.39    1.85
 -15 -10   9    3.06    1.53
 -14 -10   9   15.30    1.41
 -13 -10   9    3.42    1.24
 -12 -10   9   15.96    1.36
 -11 -10   9   -0.44    1.13
 -10 -10   9   -0.15    1.63
  -9 -10   9   -0.32    1.14
  -8 -10   9   56.99    3.44
  -7 -10   9   19.77    1.50
  -6 -10   9   15.79    2.41
  -5 -10   9   11.17    1.15
  -4 -10   9  112.21    8.69
  -3 -10   9   16.56    1.42
  -2 -10   9   15.61    1.16
  -1 -10   9    0.07    1.06
   0 -10   9   81.94    2.10
   1 -10   9   24.31    2.18
   2 -10   9    0.10    1.14
   3 -10   9    5.71    1.11
   4 -10   9   19.62    1.29
   5 -10   9   21.90    3.80
   6 -10   9    1.25    1.24
   7 -10   9   30.79    1.63
 -14 -11   9   17.25    1.53
 -13 -11   9   -0.30    1.26
 -12 -11   9   -0.68    1.17
 -11 -11   9    0.25    1.87
 -10 -11   9    5.70    1.28
  -9 -11   9    4.97    1.28
  -8 -11   9    1.81    1.15
  -7 -11   9    2.84    1.47
  -6 -11   9   39.36    4.22
  -5 -11   9    0.62    1.15
  -4 -11   9    1.72    1.39
  -3 -11   9   96.68    4.01
  -2 -11   9   52.47    7.46
  -1 -11   9    8.38    1.25
   0 -11   9    8.50    1.13
   1 -11   9    0.78    1.11
   2 -11   9    1.19    1.22
   3 -11   9   16.30    1.28
   4 -11   9    3.68    1.27
   5 -11   9   44.85    1.96
   6 -11   9    1.81    1.27
 -13 -12   9   -0.97    1.31
 -12 -12   9    2.00    1.35
 -11 -12   9   14.36    1.48
 -10 -12   9   16.15    1.44
  -9 -12   9    5.72    1.35
  -8 -12   9   27.35    2.22
  -7 -12   9    4.94    1.44
  -6 -12   9    0.96    3.21
  -5 -12   9   73.33    8.75
  -4 -12   9    4.69    1.38
  -3 -12   9  248.43    8.29
  -2 -12   9   21.49    5.54
  -1 -12   9   29.12    1.76
   0 -12   9    2.83    1.42
   1 -12   9    3.34    1.23
   2 -12   9    6.07    1.29
   3 -12   9    7.10    1.29
   4 -12   9   46.90    1.86
   5 -12   9   55.48    2.16
 -11 -13   9   -1.39    1.41
 -10 -13   9   -0.56    1.37
  -9 -13   9    3.33    1.54
  -8 -13   9   18.86    1.72
  -7 -13   9    0.74    1.46
  -6 -13   9   -0.62    2.57
  -5 -13   9    9.05    1.76
  -4 -13   9    7.24    2.19
  -3 -13   9   47.14    7.57
  -2 -13   9   -0.15    1.92
  -1 -13   9    7.61    1.58
   0 -13   9    3.56    1.69
   1 -13   9    4.05    1.58
   2 -13   9    0.79    1.63
   3 -13   9   67.14    2.48
  -9 -14   9   13.15    2.98
  -8 -14   9   21.85    3.12
  -7 -14   9    5.53    2.37
  -6 -14   9    2.63    2.76
  -5 -14   9    6.95    2.99
  -4 -14   9   20.53    3.06
  -3 -14   9   -2.04    3.09
  -2 -14   9   17.34    3.35
  -1 -14   9   19.40    2.43
   0 -14   9    5.36    1.59
   1 -14   9    3.94    1.71
 -18   0  10    5.38    1.75
 -16   0  10    6.84    1.45
 -14   0  10   19.88    1.79
 -12   0  10  138.84    5.01
 -10   0  10   14.46    1.80
  -8   0  10   90.62    6.11
  -6   0  10  101.71    5.66
  -4   0  10  125.20    6.77
  -2   0  10   36.54    3.03
   0   0  10   27.77    5.27
   2   0  10   83.94    8.19
   4   0  10   15.22    2.53
   6   0  10  294.97    7.35
   8   0  10   65.27    3.61
  10   0  10    3.06    2.51
 -19  -1  10    1.12    1.20
 -18  -1  10    0.04    1.87
 -17  -1  10    2.50    1.10
 -16  -1  10    0.34    0.93
 -15  -1  10    3.59    2.41
 -14  -1  10    4.57    1.02
 -13  -1  10    5.27    1.33
 -12  -1  10   -1.20    0.95
 -11  -1  10   -0.22    1.75
 -10  -1  10   75.89    3.88
  -9  -1  10   49.95    1.96
  -8  -1  10   11.48    0.90
  -7  -1  10    0.09    0.65
  -6  -1  10   26.66    1.14
  -5  -1  10    1.15    0.80
  -4  -1  10   29.42    1.49
  -3  -1  10  130.43    5.42
  -2  -1  10   26.27    1.84
  -1  -1  10   11.68    1.81
   0  -1  10    4.34    2.45
   1  -1  10    0.84    3.20
   2  -1  10   13.48    2.39
   3  -1  10   -1.59    1.82
   4  -1  10   10.56    2.53
   5  -1  10    1.36    1.56
   6  -1  10   14.04    1.76
   7  -1  10   -1.42    2.79
   8  -1  10   77.02    3.41
   9  -1  10   -2.99    1.68
  10  -1  10    7.24    1.53
 -18  -2  10   -1.36    1.26
 -17  -2  10    2.32    1.36
 -16  -2  10   -0.53    1.03
 -15  -2  10   46.39    2.00
 -14  -2  10   51.29    2.64
 -13  -2  10  155.82    7.32
 -12  -2  10   24.97    1.29
 -11  -2  10    7.80    1.14
 -10  -2  10  187.30    7.64
  -9  -2  10   -0.59    0.69
  -8  -2  10   50.11    1.91
  -7  -2  10    5.98    1.00
  -6  -2  10   20.94    1.75
  -5  -2  10   26.78    1.64
  -4  -2  10   41.18    1.49
  -3  -2  10  169.84    6.65
  -2  -2  10    7.61    1.35
  -1  -2  10   16.37    1.76
   0  -2  10   19.83    2.71
   1  -2  10  179.85    8.18
   2  -2  10   19.51    2.11
   3  -2  10    2.23    1.39
   4  -2  10    4.70    1.85
   5  -2  10   12.85    2.13
   6  -2  10    0.18    2.39
   7  -2  10    3.08    1.94
   8  -2  10   47.55    1.97
   9  -2  10   19.75    1.75
  10  -2  10   -1.50    1.85
 -18  -3  10   35.97    3.99
 -17  -3  10   -0.27    1.19
 -16  -3  10   10.03    1.04
 -15  -3  10   18.96    1.59
 -14  -3  10    4.11    1.05
 -13  -3  10   41.02    3.02
 -12  -3  10   16.43    1.17
 -11  -3  10   72.04    3.03
 -10  -3  10  160.90    9.42
  -9  -3  10   32.84    3.72
  -8  -3  10   12.37    1.03
  -7  -3  10   27.93    1.45
  -6  -3  10   30.21    1.52
  -5  -3  10   14.61    0.87
  -4  -3  10   24.74    1.11
  -3  -3  10  110.40    3.36
  -2  -3  10    1.88    1.53
  -1  -3  10   25.91    1.92
   0  -3  10    6.49    2.18
   1  -3  10  131.98    6.35
   2  -3  10  200.92   11.21
   3  -3  10   64.78    3.01
   4  -3  10   13.78    1.52
   5  -3  10   13.55    2.29
   6  -3  10   22.50    1.81
   7  -3  10    1.36    1.77
   8  -3  10   22.42    2.14
   9  -3  10    0.60    1.86
  10  -3  10    1.23    1.81
 -18  -4  10    2.14    1.34
 -17  -4  10    8.02    1.22
 -16  -4  10    4.80    1.10
 -15  -4  10   10.42    1.15
 -14  -4  10    7.99    1.65
 -13  -4  10   27.01    1.92
 -12  -4  10   11.70    1.74
 -11  -4  10   -0.20    1.23
 -10  -4  10    2.91    1.40
  -9  -4  10    0.14    0.71
  -8  -4  10    1.96    0.73
  -7  -4  10    0.02    0.74
  -6  -4  10   22.63    1.01
  -5  -4  10   14.43    0.81
  -4  -4  10    6.66    0.80
  -3  -4  10   47.76    2.11
  -2  -4  10   37.64    2.06
  -1  -4  10  106.56    5.03
   0  -4  10    6.73    1.31
   1  -4  10   42.09    2.80
   2  -4  10   14.64    1.57
   3  -4  10   56.40    2.32
   4  -4  10   46.34    2.19
   5  -4  10    2.46    1.35
   6  -4  10   28.22    1.76
   7  -4  10    4.45    1.48
   8  -4  10   44.56    2.02
   9  -4  10    1.51    1.50
  10  -4  10   10.61    1.69
 -18  -5  10    3.66    1.30
 -17  -5  10    2.29    2.14
 -16  -5  10    2.64    1.52
 -15  -5  10   -1.17    1.59
 -14  -5  10   -0.95    1.49
 -13  -5  10    9.55    1.85
 -12  -5  10    1.70    1.42
 -11  -5  10    4.60    0.93
 -10  -5  10    5.89    1.23
  -9  -5  10   64.92    2.73
  -8  -5  10    1.17    0.77
  -7  -5  10    3.63    0.85
  -6  -5  10   75.41    2.78
  -5  -5  10   22.82    1.20
  -4  -5  10   11.96    0.93
  -3  -5  10   12.74    1.16
  -2  -5  10   32.00    2.10
  -1  -5  10   62.53    3.17
   0  -5  10   19.00    2.59
   1  -5  10   26.37    1.76
   2  -5  10  265.58    6.52
   3  -5  10   43.75    2.13
   4  -5  10    9.60    1.39
   5  -5  10    0.45    1.60
   6  -5  10   64.13    2.43
   7  -5  10    2.34    1.47
   8  -5  10   26.70    1.67
   9  -5  10    9.64    1.58
 -16  -6  10    9.95    1.69
 -15  -6  10    2.52    1.19
 -14  -6  10   16.14    1.30
 -13  -6  10   -0.93    1.10
 -12  -6  10   -1.50    1.13
 -11  -6  10  185.17    7.30
 -10  -6  10   39.51    1.49
  -9  -6  10    1.14    1.11
  -8  -6  10   63.06    3.28
  -7  -6  10    3.56    1.36
  -6  -6  10   14.77    1.17
  -5  -6  10   15.48    1.07
  -4  -6  10   14.66    1.05
  -3  -6  10   -0.69    0.82
  -2  -6  10   72.88    4.37
  -1  -6  10   -0.18    0.93
   0  -6  10  225.42    6.99
   1  -6  10   60.63    2.26
   2  -6  10    1.36    1.20
   3  -6  10    6.10    1.11
   4  -6  10    3.12    1.16
   5  -6  10    5.98    1.44
   6  -6  10   20.76    1.58
   7  -6  10   70.82    2.23
   8  -6  10   30.14    1.76
   9  -6  10    5.93    1.98
 -17  -7  10    1.70    1.54
 -16  -7  10    9.59    1.57
 -15  -7  10   10.77    1.65
 -14  -7  10    4.06    1.23
 -13  -7  10   -0.59    1.19
 -12  -7  10    7.11    1.08
 -11  -7  10   24.67    1.34
 -10  -7  10    0.84    1.01
  -9  -7  10    2.13    1.13
  -8  -7  10   14.83    1.33
  -7  -7  10    2.89    1.25
  -6  -7  10    8.24    1.07
  -5  -7  10   42.90    2.38
  -4  -7  10    7.48    1.01
  -3  -7  10    3.06    1.00
  -2  -7  10   11.02    0.96
  -1  -7  10    3.56    1.19
   0  -7  10    4.38    1.11
   1  -7  10    5.74    1.04
   2  -7  10    4.80    1.18
   3  -7  10   13.92    1.60
   4  -7  10    4.13    1.16
   5  -7  10   21.27    1.63
   6  -7  10    5.44    1.27
   7  -7  10   15.02    1.39
   8  -7  10   35.19    1.69
 -16  -8  10   28.35    2.28
 -15  -8  10    0.47    1.64
 -14  -8  10    8.02    1.64
 -13  -8  10    7.79    1.23
 -12  -8  10   28.51    1.59
 -11  -8  10   25.94    1.68
 -10  -8  10    8.15    1.19
  -9  -8  10    3.57    1.17
  -8  -8  10    1.51    1.57
  -7  -8  10   20.84    2.31
  -6  -8  10   -1.35    1.36
  -5  -8  10   21.57    1.35
  -4  -8  10    3.12    1.02
  -3  -8  10    0.46    0.91
  -2  -8  10   10.09    1.35
  -1  -8  10   11.31    1.74
   0  -8  10    7.43    1.07
   1  -8  10    4.27    1.14
   2  -8  10   24.72    1.39
   3  -8  10    1.08    1.63
   4  -8  10    2.16    1.15
   5  -8  10   16.44    1.29
   6  -8  10   36.57    1.61
   7  -8  10   -0.22    1.27
   8  -8  10   11.97    1.36
 -15  -9  10    5.24    1.62
 -14  -9  10    6.80    1.61
 -13  -9  10    4.31    1.33
 -12  -9  10    1.02    1.22
 -11  -9  10   -0.42    1.29
 -10  -9  10    3.06    1.90
  -9  -9  10    8.37    1.31
  -8  -9  10   37.34    1.95
  -7  -9  10    3.75    1.59
  -6  -9  10    2.51    1.35
  -5  -9  10  133.67    8.45
  -4  -9  10   38.59    1.93
  -3  -9  10   10.42    1.58
  -2  -9  10   -1.37    0.89
  -1  -9  10    3.20    1.07
   0  -9  10    2.94    1.08
   1  -9  10   21.79    1.30
   2  -9  10   11.16    1.11
   3  -9  10    0.28    1.04
   4  -9  10    0.44    1.13
   5  -9  10    1.38    1.25
   6  -9  10   10.97    1.27
   7  -9  10   72.27    2.17
 -14 -10  10   14.42    1.73
 -13 -10  10   20.63    1.59
 -12 -10  10   36.87    2.45
 -11 -10  10   10.81    1.38
 -10 -10  10    1.41    1.53
  -9 -10  10    7.54    1.29
  -8 -10  10    3.23    1.37
  -7 -10  10    2.41    1.42
  -6 -10  10   11.40    1.50
  -5 -10  10   45.34    4.04
  -4 -10  10   91.45    6.19
  -3 -10  10   23.51    1.54
  -2 -10  10   69.68    2.68
  -1 -10  10    7.02    1.14
   0 -10  10    0.14    1.15
   1 -10  10    3.36    1.06
   2 -10  10    3.60    1.01
   3 -10  10    2.49    1.08
   4 -10  10    0.39    2.74
   5 -10  10    4.21    1.36
   6 -10  10    1.18    1.37
 -13 -11  10    0.79    1.38
 -12 -11  10    0.79    1.35
 -11 -11  10    6.18    1.82
 -10 -11  10   56.51    2.18
  -9 -11  10    8.30    1.48
  -8 -11  10    9.13    2.02
  -7 -11  10    5.90    2.43
  -6 -11  10   -0.59    1.67
  -5 -11  10   41.90    6.96
  -4 -11  10   16.41    2.19
  -3 -11  10   23.89    3.17
  -2 -11  10   16.40    2.14
  -1 -11  10    1.82    1.51
   0 -11  10   -0.10    1.04
   1 -11  10    0.53    1.26
   2 -11  10    6.72    1.33
   3 -11  10   38.56    2.65
   4 -11  10   19.58    1.46
   5 -11  10    5.73    1.34
 -12 -12  10    2.59    1.50
 -11 -12  10    5.35    1.58
 -10 -12  10   13.97    1.54
  -9 -12  10   16.16    1.57
  -8 -12  10    7.26    1.67
  -7 -12  10    2.23    2.05
  -6 -12  10    3.63    2.59
  -5 -12  10   75.56    5.76
  -4 -12  10    5.52    2.13
  -3 -12  10    0.58    2.75
  -2 -12  10    2.74    1.72
  -1 -12  10    3.49    1.29
   0 -12  10   21.08    2.84
   1 -12  10    3.89    1.56
   2 -12  10    1.52    2.00
   3 -12  10    1.84    1.39
 -10 -13  10    7.96    1.72
  -9 -13  10   40.70    2.45
  -8 -13  10    4.22    1.72
  -7 -13  10    3.54    1.69
  -6 -13  10    0.54    1.81
  -5 -13  10   34.53    3.09
  -4 -13  10   96.23    4.18
  -3 -13  10   22.06    3.56
  -2 -13  10    7.84    4.05
  -1 -13  10    2.38    1.49
   0 -13  10    8.66    1.63
   1 -13  10    6.28    1.96
  -6 -14  10    3.54    2.98
  -5 -14  10    0.85    3.19
  -4 -14  10   13.10    4.32
  -3 -14  10    0.82    3.52
  -2 -14  10    7.14    4.04
 -18   0  11   -0.30    1.57
 -16   0  11    0.82    1.47
 -14   0  11   -0.77    1.44
 -12   0  11   -0.51    1.67
 -10   0  11    0.93    1.64
  -8   0  11    0.15    1.70
  -6   0  11    0.90    1.47
  -4   0  11   -1.00    1.45
  -2   0  11   -1.68    1.83
   0   0  11   -2.46    4.28
   2   0  11   -0.09    1.86
   4   0  11   -2.61    2.10
   6   0  11    1.02    5.87
   8   0  11   -3.91    3.46
 -18  -1  11    2.10    1.16
 -17  -1  11   10.93    1.22
 -16  -1  11   25.49    1.35
 -15  -1  11   17.91    4.13
 -14  -1  11   26.30    3.72
 -13  -1  11   20.28    2.18
 -12  -1  11  165.30    7.83
 -11  -1  11  371.36    9.41
 -10  -1  11   19.31    1.41
  -9  -1  11   10.17    1.54
  -8  -1  11   16.42    1.39
  -7  -1  11    1.15    0.76
  -6  -1  11   24.84    1.15
  -5  -1  11  106.30    3.71
  -4  -1  11   10.77    1.20
  -3  -1  11   47.01    2.62
  -2  -1  11    7.44    1.70
  -1  -1  11   39.94    3.83
   0  -1  11  407.56   22.07
   1  -1  11   10.47    2.60
   2  -1  11  140.22    5.38
   3  -1  11    3.40    1.85
   4  -1  11   14.72    2.59
   5  -1  11    1.79    1.54
   6  -1  11    2.45    2.27
   7  -1  11    3.15    1.87
   8  -1  11    4.06    1.72
   9  -1  11   -2.65    1.82
 -18  -2  11    0.33    1.31
 -17  -2  11    0.59    1.23
 -16  -2  11    0.73    2.22
 -15  -2  11   -0.27    1.07
 -14  -2  11   12.78    1.27
 -13  -2  11   36.58    1.52
 -12  -2  11  143.89    7.01
 -11  -2  11   -1.00    1.16
 -10  -2  11    1.74    1.60
  -9  -2  11  128.25    6.38
  -8  -2  11    0.70    1.27
  -7  -2  11   52.52    2.42
  -6  -2  11    4.20    0.83
  -5  -2  11   54.32    2.62
  -4  -2  11   75.04    3.32
  -3  -2  11    2.64    1.25
  -2  -2  11  133.34    5.41
  -1  -2  11   40.64    3.41
   0  -2  11   14.92    2.27
   1  -2  11    0.38    1.42
   2  -2  11  164.33    7.09
   3  -2  11    0.87    1.41
   4  -2  11    3.24    1.80
   5  -2  11   26.36    5.05
   6  -2  11   94.69    3.68
   7  -2  11   61.20    4.52
   8  -2  11    0.78    1.56
   9  -2  11    2.41    1.69
 -18  -3  11   11.87    1.52
 -17  -3  11    5.63    1.60
 -16  -3  11    9.32    1.24
 -15  -3  11    6.65    1.20
 -14  -3  11    0.11    1.08
 -13  -3  11    6.56    1.23
 -12  -3  11    2.59    2.04
 -11  -3  11    0.92    1.18
 -10  -3  11   11.22    1.98
  -9  -3  11    5.48    1.77
  -8  -3  11   -3.09    1.52
  -7  -3  11    4.87    1.18
  -6  -3  11   36.07    1.85
  -5  -3  11   97.80    3.08
  -4  -3  11   85.16    3.31
  -3  -3  11   17.64    1.58
  -2  -3  11   19.73    1.97
  -1  -3  11  142.48    7.61
   0  -3  11   32.17    2.26
   1  -3  11  121.97    4.56
   2  -3  11   -0.23    1.26
   3  -3  11    0.51    1.47
   4  -3  11   13.44    1.60
   5  -3  11   17.26    1.73
   6  -3  11    2.02    1.54
   7  -3  11   62.08    2.53
   8  -3  11    1.69    1.92
   9  -3  11   11.78    3.23
 -17  -4  11    1.65    1.25
 -16  -4  11    6.29    1.26
 -15  -4  11   17.09    1.30
 -14  -4  11    0.70    1.73
 -13  -4  11   17.19    1.96
 -12  -4  11    7.76    3.05
 -11  -4  11  112.67    7.91
 -10  -4  11   12.66    1.71
  -9  -4  11    6.96    1.19
  -8  -4  11   17.60    1.47
  -7  -4  11    2.73    0.97
  -6  -4  11    1.57    0.99
  -5  -4  11   73.31    3.20
  -4  -4  11   27.34    1.46
  -3  -4  11    4.61    1.35
  -2  -4  11  176.37    7.90
  -1  -4  11   -1.37    1.57
   0  -4  11  109.17    4.10
   1  -4  11   35.26    2.30
   2  -4  11    2.29    1.22
   3  -4  11    1.61    1.26
   4  -4  11   -0.09    1.34
   5  -4  11    9.72    1.51
   6  -4  11   12.25    1.53
   7  -4  11    8.62    1.91
   8  -4  11    1.18    1.54
 -17  -5  11    7.53    2.08
 -16  -5  11   80.68    2.88
 -15  -5  11    1.13    2.11
 -14  -5  11   14.13    2.02
 -13  -5  11   15.94    2.21
 -12  -5  11    0.24    1.19
 -11  -5  11   -0.62    1.34
 -10  -5  11   51.18    2.38
  -9  -5  11   18.38    1.69
  -8  -5  11   87.38    2.90
  -7  -5  11    0.42    1.36
  -6  -5  11    2.68    0.99
  -5  -5  11  354.04   17.20
  -4  -5  11   12.85    1.18
  -3  -5  11    2.38    1.01
  -2  -5  11   58.54    1.97
  -1  -5  11   46.93    1.88
   0  -5  11    0.62    1.68
   1  -5  11   14.33    1.36
   2  -5  11    8.68    1.25
   3  -5  11    9.44    1.44
   4  -5  11   -1.41    1.27
   5  -5  11    2.82    1.93
   6  -5  11    3.65    1.41
   7  -5  11   54.28    2.30
   8  -5  11    2.26    1.65
 -16  -6  11   14.47    1.31
 -15  -6  11   -0.53    1.48
 -14  -6  11    8.81    1.36
 -13  -6  11   18.66    1.40
 -12  -6  11    1.46    1.25
 -11  -6  11    0.43    1.05
 -10  -6  11    3.90    1.27
  -9  -6  11   34.65    2.30
  -8  -6  11    6.58    1.34
  -7  -6  11   -0.96    1.59
  -6  -6  11   14.57    1.97
  -5  -6  11   13.45    1.51
  -4  -6  11    4.10    1.96
  -3  -6  11   79.10    2.48
  -2  -6  11   11.10    1.04
  -1  -6  11    1.02    0.97
   0  -6  11    6.82    1.17
   1  -6  11    1.70    1.14
   2  -6  11    0.84    1.10
   3  -6  11    2.60    1.15
   4  -6  11   -1.38    1.25
   5  -6  11    7.77    1.34
   6  -6  11   17.98    1.46
   7  -6  11   18.41    1.74
 -16  -7  11   -2.45    1.84
 -15  -7  11   14.58    1.77
 -14  -7  11    7.83    1.68
 -13  -7  11    7.67    1.34
 -12  -7  11    0.22    1.42
 -11  -7  11   42.38    1.77
 -10  -7  11    4.49    1.19
  -9  -7  11    6.99    1.98
  -8  -7  11   84.46    3.03
  -7  -7  11   28.54    2.06
  -6  -7  11   23.20    2.06
  -5  -7  11    6.19    1.11
  -4  -7  11    5.84    0.99
  -3  -7  11    3.22    0.92
  -2  -7  11   11.98    1.05
  -1  -7  11   54.95    1.92
   0  -7  11    3.61    1.06
   1  -7  11   18.48    1.31
   2  -7  11    3.20    1.17
   3  -7  11    1.17    1.17
   4  -7  11   24.81    1.70
   5  -7  11    2.19    1.30
   6  -7  11   78.14    2.49
   7  -7  11    3.24    1.73
 -15  -8  11    3.81    1.68
 -14  -8  11   -1.77    1.90
 -13  -8  11    0.50    1.58
 -12  -8  11   -1.53    1.74
 -11  -8  11   -0.60    1.14
 -10  -8  11   -0.30    1.16
  -9  -8  11    2.32    1.25
  -8  -8  11    3.06    1.51
  -7  -8  11    2.60    1.54
  -6  -8  11    2.74    1.74
  -5  -8  11    2.83    1.75
  -4  -8  11   -0.35    0.90
  -3  -8  11    5.30    0.99
  -2  -8  11    1.15    0.89
  -1  -8  11    0.95    2.02
   0  -8  11    0.97    0.97
   1  -8  11    8.25    1.15
   2  -8  11   37.71    1.70
   3  -8  11   35.96    1.62
   4  -8  11    5.52    1.18
   5  -8  11    6.17    1.31
   6  -8  11   11.52    1.36
 -14  -9  11    6.84    1.92
 -13  -9  11    2.54    1.80
 -12  -9  11   10.97    1.79
 -11  -9  11    6.69    1.44
 -10  -9  11    1.91    1.39
  -9  -9  11   13.00    1.51
  -8  -9  11    6.12    1.60
  -7  -9  11   11.23    1.63
  -6  -9  11    4.05    1.70
  -5  -9  11    3.61    1.54
  -4  -9  11    7.74    1.65
  -3  -9  11    0.35    0.97
  -2  -9  11    1.47    1.06
  -1  -9  11    9.06    1.22
   0  -9  11   15.31    1.25
   1  -9  11    6.11    2.99
   2  -9  11   11.03    1.57
   3  -9  11   -0.74    1.25
   4  -9  11   14.46    1.42
   5  -9  11    7.44    1.41
 -13 -10  11   22.61    2.43
 -12 -10  11    0.01    1.72
 -11 -10  11    4.38    1.61
 -10 -10  11    4.84    1.50
  -9 -10  11   14.56    1.69
  -8 -10  11   11.49    1.68
  -7 -10  11   -1.35    1.68
  -6 -10  11   65.86    2.71
  -5 -10  11    6.30    2.30
  -4 -10  11   28.94    3.07
  -3 -10  11    1.81    2.02
  -2 -10  11    0.01    1.08
  -1 -10  11    3.28    1.17
   0 -10  11    0.11    0.99
   1 -10  11    0.04    1.15
   2 -10  11    1.11    1.25
   3 -10  11   62.59    2.42
   4 -10  11    9.53    3.82
 -12 -11  11    7.61    1.54
 -11 -11  11   11.81    1.61
 -10 -11  11    0.10    1.75
  -9 -11  11   11.29    1.74
  -8 -11  11    1.46    1.68
  -7 -11  11   23.97    2.06
  -6 -11  11    4.44    3.82
  -5 -11  11   -3.77    2.26
  -4 -11  11   59.64    6.77
  -3 -11  11   33.97    3.32
  -2 -11  11   -0.93    2.09
  -1 -11  11    0.55    1.30
   0 -11  11   42.82    2.05
   1 -11  11    3.90    1.29
   2 -11  11   18.44    1.45
   3 -11  11    3.63    1.28
 -10 -12  11    2.41    1.68
  -9 -12  11   44.54    4.47
  -8 -12  11    3.55    1.80
  -7 -12  11   13.95    2.20
  -6 -12  11   39.02    2.28
  -5 -12  11   45.52    3.00
  -4 -12  11   29.23    5.64
  -3 -12  11   16.77    3.10
  -2 -12  11   17.87    4.11
  -1 -12  11   13.67    5.46
   0 -12  11    7.58    1.71
   1 -12  11   43.16    2.00
  -7 -13  11    1.33    1.86
  -6 -13  11    0.93    2.25
  -5 -13  11   10.57    3.46
  -4 -13  11   -1.81    3.69
  -3 -13  11   31.79    4.33
  -2 -13  11    6.82    4.34
 -16   0  12   21.73    1.90
 -14   0  12  192.49    4.77
 -12   0  12  172.18    4.48
 -10   0  12  337.50   22.30
  -8   0  12   36.13    3.88
  -6   0  12   38.20    2.48
  -4   0  12    0.27    2.49
  -2   0  12   52.45    5.39
   0   0  12   40.25    5.31
   2   0  12    2.62    2.13
   4   0  12    2.29    2.30
   6   0  12   46.38    3.26
 -17  -1  12    2.57    1.29
 -16  -1  12   14.83    1.34
 -15  -1  12   18.33    2.18
 -14  -1  12   41.02    1.60
 -13  -1  12    3.66    2.99
 -12  -1  12   88.06    2.38
 -11  -1  12   29.86    1.61
 -10  -1  12    5.54    1.38
  -9  -1  12   20.88    1.68
  -8  -1  12   12.90    2.48
  -7  -1  12   -0.79    1.35
  -6  -1  12   15.68    1.49
  -5  -1  12   12.32    1.64
  -4  -1  12    9.74    1.35
  -3  -1  12    5.75    2.46
  -2  -1  12   25.01    2.77
  -1  -1  12  164.55    7.09
   0  -1  12   -2.02    2.44
   1  -1  12    1.20    1.75
   2  -1  12    4.46    1.82
   3  -1  12   10.45    1.93
   4  -1  12    8.94    1.94
   5  -1  12    9.53    1.70
   6  -1  12    4.11    1.67
   7  -1  12    2.03    1.84
 -17  -2  12    8.17    2.13
 -16  -2  12   19.66    2.05
 -15  -2  12   11.34    1.91
 -14  -2  12   15.75    1.33
 -13  -2  12   50.41    2.31
 -12  -2  12   32.51    1.57
 -11  -2  12   17.72    1.85
 -10  -2  12   18.79    1.67
  -9  -2  12    1.57    1.38
  -8  -2  12    3.14    2.68
  -7  -2  12   -1.73    2.07
  -6  -2  12    7.68    2.90
  -5  -2  12    5.44    3.43
  -4  -2  12    1.64    1.54
  -3  -2  12   78.14    3.37
  -2  -2  12    8.54    1.63
  -1  -2  12   13.29    2.14
   0  -2  12    2.74    1.54
   1  -2  12   30.20    2.71
   2  -2  12   23.78    1.93
   3  -2  12   -0.08    1.49
   4  -2  12    4.02    2.11
   5  -2  12   42.38    2.46
   6  -2  12    4.17    1.94
   7  -2  12   -0.12    1.98
 -17  -3  12    5.26    1.51
 -16  -3  12    3.19    1.35
 -15  -3  12   26.19    2.49
 -14  -3  12    7.70    1.28
 -13  -3  12   23.40    2.32
 -12  -3  12    1.25    1.31
 -11  -3  12   12.86    1.84
 -10  -3  12   56.86    5.25
  -9  -3  12   33.61    2.64
  -8  -3  12    0.97    1.93
  -7  -3  12    1.49    2.38
  -6  -3  12   34.63    2.94
  -5  -3  12    7.76    1.08
  -4  -3  12    9.48    1.27
  -3  -3  12   24.67    1.92
  -2  -3  12   -1.68    1.76
  -1  -3  12  220.60    9.83
   0  -3  12   -0.27    1.47
   1  -3  12    1.94    1.51
   2  -3  12   -0.08    2.05
   3  -3  12    6.66    1.45
   4  -3  12    8.51    1.56
   5  -3  12   43.29    2.95
   6  -3  12    4.28    1.53
   7  -3  12    1.03    1.70
 -17  -4  12   48.19    1.81
 -16  -4  12    9.50    1.45
 -15  -4  12   20.79    1.53
 -14  -4  12    3.38    2.26
 -13  -4  12    8.45    2.08
 -12  -4  12    1.65    2.10
 -11  -4  12    5.35    2.15
 -10  -4  12   -0.10    2.59
  -9  -4  12   11.75    2.00
  -8  -4  12   19.77    1.90
  -7  -4  12   49.77    2.55
  -6  -4  12    4.20    1.75
  -5  -4  12    2.37    2.09
  -4  -4  12  106.66    4.86
  -3  -4  12   49.03    2.14
  -2  -4  12    2.46    2.42
  -1  -4  12   15.84    1.50
   0  -4  12   52.47    2.05
   1  -4  12   -0.66    1.25
   2  -4  12   35.61    3.71
   3  -4  12    0.36    1.31
   4  -4  12   11.87    1.51
   5  -4  12    4.29    1.56
   6  -4  12   37.71    2.16
   7  -4  12   19.90    2.88
 -16  -5  12    4.05    2.31
 -15  -5  12   51.55    3.05
 -14  -5  12   -5.01    2.52
 -13  -5  12    2.44    2.25
 -12  -5  12   16.32    1.62
 -11  -5  12   11.21    1.41
 -10  -5  12    1.04    2.39
  -9  -5  12    2.84    1.59
  -8  -5  12   28.93    2.23
  -7  -5  12   14.48    1.67
  -6  -5  12   -0.13    1.64
  -5  -5  12    1.69    2.19
  -4  -5  12   21.24    2.85
  -3  -5  12    0.09    0.88
  -2  -5  12    0.72    1.39
  -1  -5  12   -0.36    1.23
   0  -5  12   75.66    2.52
   1  -5  12    1.36    1.37
   2  -5  12   -0.67    1.19
   3  -5  12    1.45    1.24
   4  -5  12    2.42    1.37
   5  -5  12    2.98    2.39
   6  -5  12    2.94    1.44
 -16  -6  12    0.61    1.74
 -15  -6  12    0.54    1.47
 -14  -6  12    2.14    1.39
 -13  -6  12   -1.39    1.54
 -12  -6  12   62.67    4.31
 -11  -6  12   42.33    2.02
 -10  -6  12    1.18    1.56
  -9  -6  12    0.33    1.49
  -8  -6  12   20.70    2.13
  -7  -6  12   26.22    1.97
  -6  -6  12    6.24    1.80
  -5  -6  12   30.16    3.65
  -4  -6  12   32.12    3.95
  -3  -6  12    0.36    0.82
  -2  -6  12    1.74    1.07
  -1  -6  12   40.19    2.02
   0  -6  12   28.16    1.59
   1  -6  12   12.71    1.39
   2  -6  12    1.29    1.13
   3  -6  12    2.52    1.28
   4  -6  12    2.14    1.90
   5  -6  12   -0.70    1.50
   6  -6  12    5.59    1.48
 -15  -7  12   13.12    2.09
 -14  -7  12   41.87    2.69
 -13  -7  12   13.53    1.47
 -12  -7  12    0.34    1.61
 -11  -7  12   -0.47    2.02
 -10  -7  12   21.07    2.96
  -9  -7  12    4.00    1.59
  -8  -7  12    5.51    1.53
  -7  -7  12   -0.47    2.07
  -6  -7  12   68.96    4.08
  -5  -7  12    0.48    1.94
  -4  -7  12    9.54    2.29
  -3  -7  12   17.42    2.04
  -2  -7  12    0.81    0.87
  -1  -7  12   10.58    1.12
   0  -7  12    3.34    1.06
   1  -7  12    1.46    1.15
   2  -7  12   12.42    1.25
   3  -7  12   14.95    1.44
   4  -7  12    0.28    1.23
   5  -7  12   40.30    1.80
 -14  -8  12   11.34    2.06
 -13  -8  12    9.76    1.93
 -12  -8  12   21.28    2.07
 -11  -8  12   -0.53    1.76
 -10  -8  12    1.02    1.42
  -9  -8  12    0.74    1.49
  -8  -8  12    3.00    1.56
  -7  -8  12    1.26    1.77
  -6  -8  12    4.94    1.80
  -5  -8  12    3.17    1.91
  -4  -8  12    5.06    2.11
  -3  -8  12   18.29    2.07
  -2  -8  12    1.24    0.92
  -1  -8  12    0.90    1.01
   0  -8  12   32.02    2.52
   1  -8  12    0.81    1.11
   2  -8  12    3.55    1.17
   3  -8  12    0.74    1.19
   4  -8  12    1.45    1.35
 -13  -9  12    0.80    2.07
 -12  -9  12    0.76    2.03
 -11  -9  12    0.77    2.18
 -10  -9  12   28.17    2.06
  -9  -9  12    4.75    1.91
  -8  -9  12    4.95    1.75
  -7  -9  12    0.67    1.65
  -6  -9  12    7.93    2.00
  -5  -9  12   41.71    2.62
  -4  -9  12    9.00    1.95
  -3  -9  12    4.75    2.10
  -2  -9  12    6.90    2.22
  -1  -9  12   10.92    1.45
   0  -9  12   -0.14    1.16
   1  -9  12    6.32    1.25
   2  -9  12   23.17    1.56
   3  -9  12   17.71    1.36
 -12 -10  12   68.50    3.25
 -11 -10  12    3.19    2.44
 -10 -10  12   51.17    2.97
  -9 -10  12   19.02    2.63
  -8 -10  12   12.04    1.83
  -7 -10  12    3.99    4.59
  -6 -10  12    3.55    2.00
  -5 -10  12   39.44    2.89
  -4 -10  12    8.96    1.97
  -3 -10  12    4.01    2.75
  -2 -10  12   10.14    3.67
  -1 -10  12   59.81    5.30
   0 -10  12   76.28    2.45
   1 -10  12    3.25    1.23
   2 -10  12    0.89    1.34
 -10 -11  12   27.97    3.18
  -9 -11  12   29.33    2.16
  -8 -11  12    5.44    1.94
  -7 -11  12    3.35    2.15
  -6 -11  12   24.67    5.01
  -5 -11  12   -0.92    2.95
  -4 -11  12   17.53    3.48
  -3 -11  12    4.04    5.19
  -2 -11  12    1.84    3.66
  -1 -11  12    5.28    3.47
   0 -11  12    4.00    5.12
  -7 -12  12    9.05    2.43
  -6 -12  12    3.71    2.84
  -5 -12  12    6.51    2.67
  -4 -12  12    0.78    2.92
  -3 -12  12   63.66    4.95
 -16   0  13    0.87    1.98
 -14   0  13    3.85    1.99
 -12   0  13   -2.08    2.03
 -10   0  13    0.87    2.20
  -8   0  13   -3.07    2.25
  -6   0  13   -4.47    2.98
  -4   0  13   -1.29    2.44
  -2   0  13   -2.21    2.69
   0   0  13   -1.03    3.51
   2   0  13   -2.06    2.20
   4   0  13    0.30    2.42
   6   0  13    2.17    2.56
 -17  -1  13   36.53    1.75
 -16  -1  13   13.47    1.48
 -15  -1  13    3.31    1.37
 -14  -1  13   25.95    1.56
 -13  -1  13    9.94    1.50
 -12  -1  13   62.97    3.42
 -11  -1  13  127.25    6.01
 -10  -1  13   13.66    1.68
  -9  -1  13    4.98    2.27
  -8  -1  13   44.14    2.27
  -7  -1  13    2.92    1.85
  -6  -1  13    8.90    2.06
  -5  -1  13    2.57    1.93
  -4  -1  13    8.35    2.98
  -3  -1  13   61.95    3.34
  -2  -1  13   20.58    2.32
  -1  -1  13    5.42    2.49
   0  -1  13  192.11    9.34
   1  -1  13    5.44    1.88
   2  -1  13   -2.57    1.92
   3  -1  13    6.21    2.05
   4  -1  13   12.86    2.14
   5  -1  13    8.17    1.82
   6  -1  13   24.44    1.99
 -16  -2  13   -0.49    1.47
 -15  -2  13   11.94    2.73
 -14  -2  13    1.44    2.85
 -13  -2  13   10.11    1.90
 -12  -2  13   25.12    2.71
 -11  -2  13   95.27    3.74
 -10  -2  13   16.77    2.00
  -9  -2  13   23.94    2.06
  -8  -2  13   27.77    2.25
  -7  -2  13   28.51    3.35
  -6  -2  13   10.81    2.78
  -5  -2  13    0.64    3.11
  -4  -2  13    5.84    1.72
  -3  -2  13   72.41    2.97
  -2  -2  13    0.96    1.98
  -1  -2  13   -1.72    2.41
   0  -2  13   81.23    3.71
   1  -2  13   23.46    1.96
   2  -2  13    3.20    1.48
   3  -2  13   -2.49    1.51
   4  -2  13   -0.84    2.17
   5  -2  13   -1.57    2.67
   6  -2  13    1.19    2.07
 -16  -3  13    2.61    1.53
 -15  -3  13    0.58    4.24
 -14  -3  13    0.34    1.54
 -13  -3  13   11.96    1.70
 -12  -3  13   41.22    2.13
 -11  -3  13    7.87    1.47
 -10  -3  13   -2.49    2.48
  -9  -3  13    7.32    2.56
  -8  -3  13   -1.31    2.99
  -7  -3  13   18.95    3.07
  -6  -3  13   -0.47    1.96
  -5  -3  13   50.11    4.03
  -4  -3  13    7.53    2.56
  -3  -3  13    7.56    1.51
  -2  -3  13   54.22    2.31
  -1  -3  13    3.76    1.40
   0  -3  13   11.01    1.69
   1  -3  13   29.81    2.76
   2  -3  13   -1.81    1.37
   3  -3  13   -0.93    1.36
   4  -3  13    2.11    1.76
   5  -3  13    7.20    2.02
 -16  -4  13    1.90    1.44
 -15  -4  13    0.43    1.39
 -14  -4  13    0.76    2.55
 -13  -4  13   18.53    2.59
 -12  -4  13   12.09    3.07
 -11  -4  13   22.95    2.76
 -10  -4  13   -3.21    3.99
  -9  -4  13   34.80    2.27
  -8  -4  13   12.44    2.04
  -7  -4  13   32.30    3.21
  -6  -4  13  111.53    4.48
  -5  -4  13    0.46    2.14
  -4  -4  13   18.62    3.30
  -3  -4  13   -4.03    2.82
  -2  -4  13   11.61    1.42
  -1  -4  13   12.15    1.33
   0  -4  13    0.12    1.36
   1  -4  13   12.24    1.98
   2  -4  13    1.65    1.40
   3  -4  13    3.03    1.41
   4  -4  13   -1.03    1.45
   5  -4  13   26.56    1.93
 -15  -5  13   -1.24    2.41
 -14  -5  13    6.41    2.54
 -13  -5  13   39.02    2.38
 -12  -5  13   50.78    2.32
 -11  -5  13    2.34    1.54
 -10  -5  13    1.67    2.06
  -9  -5  13   12.32    1.86
  -8  -5  13    5.66    2.07
  -7  -5  13    6.31    1.81
  -6  -5  13    2.94    2.19
  -5  -5  13   61.06    4.12
  -4  -5  13    5.41    2.71
  -3  -5  13   10.18    2.95
  -2  -5  13    3.43    2.05
  -1  -5  13   -0.08    1.26
   0  -5  13    9.64    1.38
   1  -5  13    4.77    1.38
   2  -5  13   -0.74    1.35
   3  -5  13   10.48    1.62
   4  -5  13   14.31    1.67
   5  -5  13    4.49    1.50
 -15  -6  13    3.98    1.69
 -14  -6  13    1.50    1.54
 -13  -6  13    0.50    2.27
 -12  -6  13    3.18    1.86
 -11  -6  13    0.28    1.67
 -10  -6  13    3.52    1.82
  -9  -6  13   11.07    1.91
  -8  -6  13    3.40    2.09
  -7  -6  13   19.88    2.38
  -6  -6  13    2.89    2.42
  -5  -6  13   46.23    4.41
  -4  -6  13   29.98    3.48
  -3  -6  13    6.69    3.22
  -2  -6  13    1.47    2.14
  -1  -6  13    4.82    1.08
   0  -6  13    0.38    1.18
   1  -6  13    4.97    1.40
   2  -6  13    0.01    1.20
   3  -6  13    1.08    1.29
   4  -6  13   19.30    1.96
 -14  -7  13   16.95    2.13
 -13  -7  13   16.26    2.26
 -12  -7  13    2.60    1.62
 -11  -7  13    6.19    1.67
 -10  -7  13   -1.31    2.16
  -9  -7  13   40.85    2.72
  -8  -7  13   22.97    2.34
  -7  -7  13   11.62    2.61
  -6  -7  13   21.70    2.31
  -5  -7  13    9.85    2.69
  -4  -7  13   -1.72    2.73
  -3  -7  13   25.24    2.87
  -2  -7  13    8.57    2.38
  -1  -7  13    9.38    4.77
   0  -7  13    4.24    1.29
   1  -7  13    0.50    1.26
   2  -7  13    2.29    1.29
   3  -7  13   20.31    1.52
 -13  -8  13    8.50    2.21
 -12  -8  13    0.57    1.93
 -11  -8  13   23.83    2.51
 -10  -8  13    2.04    2.10
  -9  -8  13    3.94    2.14
  -8  -8  13   15.65    2.00
  -7  -8  13    1.63    2.72
  -6  -8  13   60.16    3.75
  -5  -8  13    9.08    2.68
  -4  -8  13    2.06    2.07
  -3  -8  13   -0.37    2.43
  -2  -8  13    9.50    2.50
  -1  -8  13   -1.70    2.39
   0  -8  13    9.34    5.66
   1  -8  13    0.87    2.22
   2  -8  13    1.47    1.23
 -12  -9  13    2.50    1.95
 -11  -9  13   58.03    3.46
 -10  -9  13   11.55    2.51
  -9  -9  13    3.89    2.09
  -8  -9  13    0.93    2.06
  -7  -9  13   -0.71    2.15
  -6  -9  13    3.85    2.40
  -5  -9  13   -1.18    2.49
  -4  -9  13   43.68    6.47
  -3  -9  13   31.61    2.97
  -2  -9  13   -0.50    2.44
  -1  -9  13    2.19    4.25
   0  -9  13   56.14    5.99
   1  -9  13  115.33    5.20
 -10 -10  13    8.64    2.41
  -9 -10  13   -0.59    2.36
  -8 -10  13   26.48    5.30
  -7 -10  13   -1.57    4.72
  -6 -10  13    3.89    2.43
  -5 -10  13    1.51    2.91
  -4 -10  13    1.69    2.26
  -3 -10  13    4.64    2.43
  -2 -10  13   -0.31    3.19
  -1 -10  13    5.42    2.98
  -6 -11  13    5.21    2.72
  -5 -11  13   35.16    3.92
  -4 -11  13    6.92    3.61
 -14   0  14    0.55    2.30
 -12   0  14   19.95    5.24
 -10   0  14    5.21    2.86
  -8   0  14   -0.57    2.56
  -6   0  14    2.98    3.48
  -4   0  14  127.94   13.09
  -2   0  14  186.69    7.11
   0   0  14    8.86    4.00
   2   0  14    4.64    2.40
   4   0  14   11.44    2.67
 -15  -1  14   -0.27    1.59
 -14  -1  14    4.24    1.62
 -13  -1  14    5.98    1.74
 -12  -1  14   37.56    2.05
 -11  -1  14   -2.54    1.90
 -10  -1  14   15.36    1.87
  -9  -1  14   11.43    4.61
  -8  -1  14    4.35    2.07
  -7  -1  14    4.05    2.15
  -6  -1  14    4.68    4.69
  -5  -1  14   12.27    5.40
  -4  -1  14   -1.00    2.50
  -3  -1  14    2.09    3.49
  -2  -1  14    1.19    2.15
  -1  -1  14   96.51    4.59
   0  -1  14   48.37    2.91
   1  -1  14   25.03    2.23
   2  -1  14    0.93    1.95
   3  -1  14    8.79    2.09
   4  -1  14   -1.02    2.10
 -15  -2  14   -0.33    3.56
 -14  -2  14   46.40    2.08
 -13  -2  14   17.25    1.86
 -12  -2  14   33.13    5.26
 -11  -2  14   11.06    1.93
 -10  -2  14    2.87    1.87
  -9  -2  14    3.86    1.94
  -8  -2  14    2.57    3.66
  -7  -2  14   27.00    3.74
  -6  -2  14    6.19    3.72
  -5  -2  14    2.22    3.88
  -4  -2  14   57.82    5.39
  -3  -2  14   20.16    5.23
  -2  -2  14  223.53   10.84
  -1  -2  14   21.72    3.37
   0  -2  14   -0.89    1.71
   1  -2  14    7.26    1.51
   2  -2  14    1.85    1.61
   3  -2  14    4.20    1.63
   4  -2  14   22.95    3.59
 -15  -3  14    2.77    1.52
 -14  -3  14  139.70    3.28
 -13  -3  14   29.26    2.10
 -12  -3  14   43.24    3.02
 -11  -3  14    5.19    1.68
 -10  -3  14    2.09    2.84
  -9  -3  14   -1.63    3.21
  -8  -3  14    3.65    3.40
  -7  -3  14    2.73    4.04
  -6  -3  14   10.17    2.94
  -5  -3  14    0.10    2.54
  -4  -3  14    8.90    3.09
  -3  -3  14    3.23    3.01
  -2  -3  14   12.46    3.20
  -1  -3  14    9.82    1.70
   0  -3  14   27.51    1.88
   1  -3  14   -0.70    1.35
   2  -3  14   17.31    1.74
   3  -3  14   -0.36    1.53
 -15  -4  14   75.79    2.53
 -14  -4  14   87.22    3.64
 -13  -4  14   -2.77    2.40
 -11  -4  14   72.49    3.86
 -10  -4  14    8.87    3.06
  -9  -4  14    4.43    2.43
  -8  -4  14    1.77    2.02
  -7  -4  14    2.98    2.29
  -6  -4  14    6.30    2.75
  -5  -4  14    1.49    2.42
  -4  -4  14   -0.27    2.76
  -3  -4  14    0.93    3.24
  -2  -4  14    5.88    3.46
  -1  -4  14   -1.83    3.55
   0  -4  14   49.10    2.02
   1  -4  14    7.37    1.45
   2  -4  14    5.13    1.44
   3  -4  14    1.10    1.52
 -14  -5  14    5.46    3.54
 -13  -5  14   41.65    4.40
 -12  -5  14   10.29    1.73
 -11  -5  14    0.02    2.02
 -10  -5  14   17.65    2.15
  -9  -5  14   -0.04    1.97
  -8  -5  14   16.04    3.48
  -7  -5  14   13.87    2.86
  -6  -5  14   -3.69    2.79
  -5  -5  14   17.36    3.44
  -4  -5  14    8.97    3.51
  -3  -5  14   -0.39    3.74
  -2  -5  14   -0.97    2.75
  -1  -5  14    3.21    2.61
   0  -5  14   15.51    2.72
   1  -5  14   -1.19    1.35
   2  -5  14    9.42    1.62
 -13  -6  14    0.32    1.84
 -12  -6  14   15.33    2.05
 -11  -6  14   -1.67    2.13
 -10  -6  14   -0.84    2.18
  -9  -6  14    5.20    2.31
  -8  -6  14   -1.41    2.13
  -7  -6  14    2.75    3.58
  -6  -6  14    2.42    2.38
  -5  -6  14    5.38    2.75
  -4  -6  14    0.99    2.94
  -3  -6  14    7.03    2.26
  -2  -6  14    5.27    2.85
  -1  -6  14   20.53    3.13
   0  -6  14    9.09    2.67
   1  -6  14   13.61    2.26
   2  -6  14    1.01    1.27
 -12  -7  14    6.85    3.12
 -11  -7  14    2.33    1.94
 -10  -7  14   -3.01    3.52
  -9  -7  14   -1.38    2.18
  -8  -7  14   10.23    2.53
  -7  -7  14   10.32    5.71
  -6  -7  14   15.93    2.71
  -5  -7  14    2.78    3.29
  -4  -7  14   48.33    3.55
  -3  -7  14   20.86    2.86
  -2  -7  14    4.47    2.91
  -1  -7  14   15.97    4.85
   0  -7  14    6.33    3.77
   1  -7  14   26.81    3.10
 -11  -8  14    0.88    2.45
 -10  -8  14   22.41    2.94
  -9  -8  14    6.10    2.49
  -8  -8  14    9.02    2.79
  -7  -8  14   -0.82    3.85
  -6  -8  14    9.09    2.88
  -5  -8  14   18.02    2.37
  -4  -8  14    2.60    2.20
  -3  -8  14    0.26    3.63
  -2  -8  14    3.58    4.98
  -1  -8  14  128.38    5.18
  -9  -9  14    7.59    3.09
  -8  -9  14    2.59    2.95
  -7  -9  14   -0.82    2.97
  -6  -9  14    2.50    2.11
  -5  -9  14    0.57    2.46
  -4  -9  14   11.95    3.60
  -3  -9  14   30.27    3.15
 -14   0  15   -1.44    2.63
 -12   0  15    1.56    2.40
 -10   0  15   -1.08    2.94
  -8   0  15    1.01    3.01
  -6   0  15    3.01    4.24
  -4   0  15   -3.48    4.72
  -2   0  15    2.87    6.31
   0   0  15   -2.00    3.94
 -14  -1  15    2.54    1.94
 -13  -1  15   13.36    1.94
 -12  -1  15    4.67    2.05
 -11  -1  15    1.75    2.80
 -10  -1  15   30.91    2.99
  -9  -1  15   28.48    2.43
  -8  -1  15   -2.56    2.60
  -7  -1  15    6.95    6.74
  -6  -1  15   49.25    4.14
  -5  -1  15   10.93    4.20
  -4  -1  15   16.66    4.09
  -3  -1  15   37.17    6.66
  -2  -1  15   -5.05    6.50
  -1  -1  15   10.57    2.33
   0  -1  15   33.22    2.68
   1  -1  15    5.06    2.19
 -14  -2  15    6.41    1.85
 -13  -2  15   14.82    4.23
 -12  -2  15    2.40    3.28
 -11  -2  15    1.54    2.43
 -10  -2  15   10.53    3.11
  -9  -2  15   11.86    2.55
  -8  -2  15    9.05    2.38
  -7  -2  15    5.97    5.24
  -6  -2  15   11.38    4.84
  -5  -2  15   11.70    6.50
  -4  -2  15   23.85    6.00
  -3  -2  15    4.18    6.08
  -2  -2  15    1.94    4.50
  -1  -2  15   20.15    2.63
   0  -2  15    4.06    1.87
   1  -2  15    6.01    1.53
 -13  -3  15    2.09    2.15
 -12  -3  15   -3.40    1.97
 -11  -3  15    6.20    2.06
 -10  -3  15   16.46    3.71
  -9  -3  15    5.81    3.44
  -8  -3  15    2.84    4.37
  -7  -3  15   13.76    4.24
  -6  -3  15    5.53    2.99
  -5  -3  15    8.61    4.49
  -4  -3  15    1.99    3.30
  -3  -3  15    7.48    3.86
  -2  -3  15    1.26    2.28
  -1  -3  15    2.27    2.39
   0  -3  15    6.00    2.34
   1  -3  15   13.01    2.10
 -13  -4  15    6.75    5.54
 -12  -4  15   66.38    4.44
 -11  -4  15   -5.46    5.23
 -10  -4  15   29.66    4.18
  -9  -4  15    3.79    2.26
  -8  -4  15   -2.39    2.09
  -7  -4  15   -2.84    2.65
  -6  -4  15   11.69    3.17
  -5  -4  15   -0.56    4.68
  -4  -4  15   11.45    4.80
  -3  -4  15   -5.89    4.64
  -2  -4  15    0.30    3.46
  -1  -4  15   12.84    2.83
   0  -4  15   10.83    5.09
 -12  -5  15    5.60    4.40
 -11  -5  15   28.32    2.83
 -10  -5  15   -3.17    2.10
  -9  -5  15   -2.28    2.42
  -8  -5  15    2.17    4.29
  -7  -5  15   -6.28    2.92
  -6  -5  15    2.39    5.10
  -5  -5  15    0.23    3.55
  -4  -5  15   21.85    4.38
  -3  -5  15   -2.51    2.39
  -2  -5  15    4.55    3.21
  -1  -5  15   33.87    5.14
   0  -5  15    0.11    2.98
 -11  -6  15   -1.97    2.30
 -10  -6  15    1.18    2.51
  -9  -6  15    3.09    2.53
  -8  -6  15    4.35    2.86
  -7  -6  15    1.57    2.84
  -6  -6  15   16.88    3.80
  -5  -6  15    0.27    3.31
  -4  -6  15   17.01    4.47
  -3  -6  15   -0.15    3.25
  -2  -6  15   31.51    3.38
  -9  -7  15   12.93    3.05
  -8  -7  15   15.87    3.51
  -7  -7  15   16.28    3.20
  -6  -7  15   -1.63    3.20
  -5  -7  15   12.29    4.94
  -4  -7  15    8.07    2.46
  -3  -7  15    2.89    2.45
 -10   0  16   -4.12    3.34
  -8   0  16   24.53    6.52
  -2   0  16   14.25    7.47
 -11  -1  16    3.86    2.23
 -10  -1  16    5.66    2.56
  -9  -1  16   -0.28    2.99
  -8  -1  16   10.30    3.56
  -7  -1  16   21.73    3.19
  -6  -1  16    2.20    3.43
  -5  -1  16    5.81    4.03
  -4  -1  16   -0.26    6.53
  -3  -1  16   39.84    6.64
 -11  -2  16    1.40    2.39
 -10  -2  16    9.91    2.62
  -9  -2  16    4.61    4.49
  -8  -2  16   -3.25    4.29
  -7  -2  16    1.20    7.00
  -6  -2  16   24.26    6.55
  -5  -2  16   19.56    7.01
  -4  -2  16    6.52    8.82
  -3  -2  16   30.49   13.85
  -2  -2  16   56.71    4.49
 -10  -3  16   -2.69    4.62
  -9  -3  16   -2.14    4.10
  -8  -3  16    2.49    6.67
  -7  -3  16   11.05    5.97
  -6  -3  16   -0.77    7.28
  -5  -3  16   23.32    4.41
  -4  -3  16   12.70    5.85
  -3  -3  16   15.92    7.58
  -9  -4  16   -0.50    2.71
  -8  -4  16   -4.70    3.20
  -7  -4  16   15.00    3.30
  -6  -4  16    1.90    4.39
  -5  -4  16   -1.12    4.15
  -4  -4  16   -2.21    5.77
   0   0   0    0.00    0.00

_computing_structure_solution     'SHELXT 2014/5 (Sheldrick, 2014)'
;

_shelx_hkl_checksum   88758

#==============================================================================
#     End of CIF
#==============================================================================
