# Supplementary material for: Chemoselective oxidative generation of ortho-quinone methides and tandem transformations
Source: Springer Nature journal article supplement (doi:10.1038/s41557-020-0433-4), 2020-03-23
Supplement: 41557_2020_433_MOESM96_ESM.mol [file 41557_2020_433_MOESM96_ESM.mol]

nchem.19030504B-comp8a.mol
  ChemDraw01232014502D

 37 41  0  0  1  0  0  0  0  0999 V2000
   -2.1434    0.6187    0.0000 C   0  0  0  0  0  0  0  0  0  0  0  0
   -2.1434   -0.2063    0.0000 C   0  0  0  0  0  0  0  0  0  0  0  0
   -1.4289   -0.6188    0.0000 C   0  0  0  0  0  0  0  0  0  0  0  0
   -0.7145   -0.2063    0.0000 C   0  0  0  0  0  0  0  0  0  0  0  0
   -0.7145    0.6187    0.0000 C   0  0  0  0  0  0  0  0  0  0  0  0
   -1.4289    1.0312    0.0000 C   0  0  0  0  0  0  0  0  0  0  0  0
   -1.4289    1.8562    0.0000 O   0  0  0  0  0  0  0  0  0  0  0  0
   -2.8579   -0.6188    0.0000 C   0  0  0  0  0  0  0  0  0  0  0  0
   -2.8579    1.0312    0.0000 C   0  0  0  0  0  0  0  0  0  0  0  0
   -2.0123   -1.2021    0.0000 O   0  0  0  0  0  0  0  0  0  0  0  0
   -0.0000    0.2062    0.0000 C   0  0  0  0  0  0  0  0  0  0  0  0
    0.7145    0.6187    0.0000 C   0  0  0  0  0  0  0  0  0  0  0  0
    0.7145    1.4437    0.0000 C   0  0  0  0  0  0  0  0  0  0  0  0
   -0.0000    1.8562    0.0000 C   0  0  0  0  0  0  0  0  0  0  0  0
   -0.7145    1.4437    0.0000 O   0  0  0  0  0  0  0  0  0  0  0  0
    1.4289    1.8562    0.0000 C   0  0  0  0  0  0  0  0  0  0  0  0
    1.4289    2.6813    0.0000 C   0  0  0  0  0  0  0  0  0  0  0  0
    0.7145    3.0938    0.0000 C   0  0  0  0  0  0  0  0  0  0  0  0
   -0.0000    2.6813    0.0000 C   0  0  0  0  0  0  0  0  0  0  0  0
   -0.7145    3.0938    0.0000 C   0  0  0  0  0  0  0  0  0  0  0  0
    0.7145    3.9188    0.0000 C   0  0  0  0  0  0  0  0  0  0  0  0
    2.1434    3.0938    0.0000 O   0  0  0  0  0  0  0  0  0  0  0  0
   -1.4289   -1.4438    0.0000 O   0  0  0  0  0  0  0  0  0  0  0  0
   -0.7145   -1.8563    0.0000 C   0  0  0  0  0  0  0  0  0  0  0  0
   -0.0000   -1.4438    0.0000 C   0  0  0  0  0  0  0  0  0  0  0  0
   -0.0000   -0.6188    0.0000 C   0  0  0  0  0  0  0  0  0  0  0  0
   -0.7145   -2.6813    0.0000 C   0  0  0  0  0  0  0  0  0  0  0  0
   -0.0000   -3.0938    0.0000 C   0  0  0  0  0  0  0  0  0  0  0  0
    0.7145   -2.6813    0.0000 C   0  0  0  0  0  0  0  0  0  0  0  0
    0.7145   -1.8563    0.0000 C   0  0  0  0  0  0  0  0  0  0  0  0
   -1.4289   -3.0938    0.0000 C   0  0  0  0  0  0  0  0  0  0  0  0
   -0.0000   -3.9188    0.0000 C   0  0  0  0  0  0  0  0  0  0  0  0
    1.4289   -3.0938    0.0000 O   0  0  0  0  0  0  0  0  0  0  0  0
    0.1105   -0.2063    0.0000 H   0  0  0  0  0  0  0  0  0  0  0  0
    2.8579    2.6812    0.0000 C   0  0  0  0  0  0  0  0  0  0  0  0
   -2.0123   -2.0271    0.0000 C   0  0  0  0  0  0  0  0  0  0  0  0
    2.1434   -2.6813    0.0000 C   0  0  0  0  0  0  0  0  0  0  0  0
  1  2  2  0      
  2  3  1  0      
  3  4  1  0      
  4  5  1  0      
  5  6  1  0      
  6  1  1  0      
  6  7  2  0      
  2  8  1  0      
  1  9  1  0      
  3 10  1  1      
  5 11  1  1      
 11 12  1  0      
 12 13  1  0      
 13 14  2  0      
 14 15  1  0      
  5 15  1  6      
 13 16  1  0      
 16 17  2  0      
 17 18  1  0      
 18 19  2  0      
 19 14  1  0      
 19 20  1  0      
 18 21  1  0      
 17 22  1  0      
  3 23  1  0      
 23 24  1  0      
 24 25  2  0      
 25 26  1  0      
 26  4  1  0      
 24 27  1  0      
 27 28  2  0      
 28 29  1  0      
 29 30  2  0      
 30 25  1  0      
 27 31  1  0      
 28 32  1  0      
 29 33  1  0      
  4 34  1  1      
 22 35  1  0      
 10 36  1  0      
 33 37  1  0      
M  END
