# Supplementary material for: Chemoselective oxidative generation of ortho-quinone methides and tandem transformations
Source: Springer Nature journal article supplement (doi:10.1038/s41557-020-0433-4), 2020-03-23
Supplement: 41557_2020_433_MOESM204_ESM.mol [file 41557_2020_433_MOESM204_ESM.mol]

nchem.19030504B-comp14a.mol
  ChemDraw01232014502D

 29 33  0  0  1  0  0  0  0  0999 V2000
   -0.7141   -0.5631    0.0000 C   0  0  0  0  0  0  0  0  0  0  0  0
    0.0004   -0.1506    0.0000 C   0  0  0  0  0  0  0  0  0  0  0  0
   -1.4285   -0.1506    0.0000 C   0  0  0  0  0  0  0  0  0  0  0  0
   -1.4285    0.6744    0.0000 C   0  0  0  0  0  0  0  0  0  0  0  0
   -0.7141    1.0869    0.0000 C   0  0  0  0  0  0  0  0  0  0  0  0
    0.0004    0.6744    0.0000 C   0  0  0  0  0  0  0  0  0  0  0  0
    0.7149    1.0869    0.0000 C   0  0  0  0  0  0  0  0  0  0  0  0
   -0.7141    1.9119    0.0000 O   0  0  0  0  0  0  0  0  0  0  0  0
    0.0004    2.3244    0.0000 C   0  0  0  0  0  0  0  0  0  0  0  0
    0.7149    1.9119    0.0000 C   0  0  0  0  0  0  0  0  0  0  0  0
   -0.4116    3.0381    0.0000 C   0  0  0  0  0  0  0  0  0  0  0  0
   -2.1430   -0.5631    0.0000 C   0  0  0  0  0  0  0  0  0  0  0  0
   -2.8575   -0.1506    0.0000 C   0  0  0  0  0  0  0  0  0  0  0  0
   -2.8575    0.6744    0.0000 C   0  0  0  0  0  0  0  0  0  0  0  0
   -2.1430    1.0869    0.0000 C   0  0  0  0  0  0  0  0  0  0  0  0
    0.4124    3.0381    0.0000 C   0  0  0  0  0  0  0  0  0  0  0  0
    1.4294    2.3244    0.0000 C   0  0  0  0  0  0  0  0  0  0  0  0
    2.1438    1.9119    0.0000 C   0  0  0  0  0  0  0  0  0  0  0  0
    2.1438    1.0869    0.0000 C   0  0  0  0  0  0  0  0  0  0  0  0
    1.4294    0.6744    0.0000 C   0  0  0  0  0  0  0  0  0  0  0  0
    2.8575    0.6749    0.0000 C   0  0  0  0  0  0  0  0  0  0  0  0
    0.7149    2.7360    0.0000 H   0  0  0  0  0  0  0  0  0  0  0  0
    0.7149    0.2629    0.0000 H   0  0  0  0  0  0  0  0  0  0  0  0
   -0.7141   -1.3881    0.0000 C   0  0  0  0  0  0  0  0  0  0  0  0
   -1.4285   -1.8006    0.0000 C   0  0  0  0  0  0  0  0  0  0  0  0
   -1.4285   -2.6256    0.0000 C   0  0  0  0  0  0  0  0  0  0  0  0
   -0.7141   -3.0381    0.0000 C   0  0  0  0  0  0  0  0  0  0  0  0
    0.0004   -2.6256    0.0000 C   0  0  0  0  0  0  0  0  0  0  0  0
    0.0004   -1.8006    0.0000 C   0  0  0  0  0  0  0  0  0  0  0  0
  1  2  2  0      
  1  3  1  0      
  3  4  2  0      
  4  5  1  0      
  5  6  2  0      
  6  2  1  0      
  6  7  1  0      
  5  8  1  0      
  9 10  1  0      
  9 11  1  0      
  3 12  1  0      
 12 13  2  0      
 13 14  1  0      
 14 15  2  0      
 15  4  1  0      
  1 24  1  0      
  9 16  1  0      
 10 17  1  0      
 17 18  1  0      
 18 19  1  0      
  7 20  1  0      
 20 19  1  0      
 19 21  1  6      
  8  9  1  0      
 10  7  1  0      
 10 22  1  6      
  7 23  1  1      
 28 29  2  0      
 27 28  1  0      
 26 27  2  0      
 25 26  1  0      
 24 25  2  0      
 24 29  1  0      
M  END
